# Supplementary material for: SnAr Reactions of 2,4-Diazidopyrido[3,2-d]pyrimidine and Azide-Tetrazole Equilibrium Studies of the Obtained 5-Substituted Tetrazolo[1,5-a]pyrido[2,3-e]pyrimidines
Source: MDPI journal article supplement (doi:10.3390/molecules27227675), 2022-11-08

## Supplementary material

### **S<sub>N</sub>Ar Reactions of 2,4-Diazidopyrido[3,2-*e*]pyrimidine and Azide-Tetrazole Equilibrium Studies of the Obtained 5-Substituted Tetrazolo[1,5-*a*]pyrido[2,3-*e*]pyrimidines**

Kristaps Leškovskis<sup>1</sup>, Anatoly Mishnev<sup>2</sup> and Irina Novosjolova<sup>1,\*</sup>, Māris Turks<sup>1,\*</sup>

<sup>1</sup>Institute of Technology of Organic Chemistry, Faculty of Materials Science and Applied Chemistry, Riga Technical University, P. Valdena str. 3, Riga, LV 1048, Latvia

<sup>2</sup>Latvian Institute of Organic Synthesis, Aizkraukles str. 21, Riga, LV-1006, Latvia

\*Correspondence: [Irina.Novosjolova@rtu.lv](mailto:Irina.Novosjolova@rtu.lv) (I.N.); [Maris.Turks@rtu.lv](mailto:Maris.Turks@rtu.lv) (M.T.)

## Contents

|                                                                                                              |    |
|--------------------------------------------------------------------------------------------------------------|----|
| Gibbs and van't Hoff plots .....                                                                             | 3  |
| Gibbs and van' t Hoff plot derived thermodynamic values of tautomerization for<br>compounds <b>3-5</b> ..... | 7  |
| <sup>1</sup> H NMR spectra of tetrazoles <b>3-5</b> in CDCl <sub>3</sub> at variable temperatures.....       | 8  |
| <sup>1</sup> H, <sup>13</sup> C and <sup>31</sup> P NMR for obtained compounds .....                         | 15 |

## Gibbs and van't Hoff plots

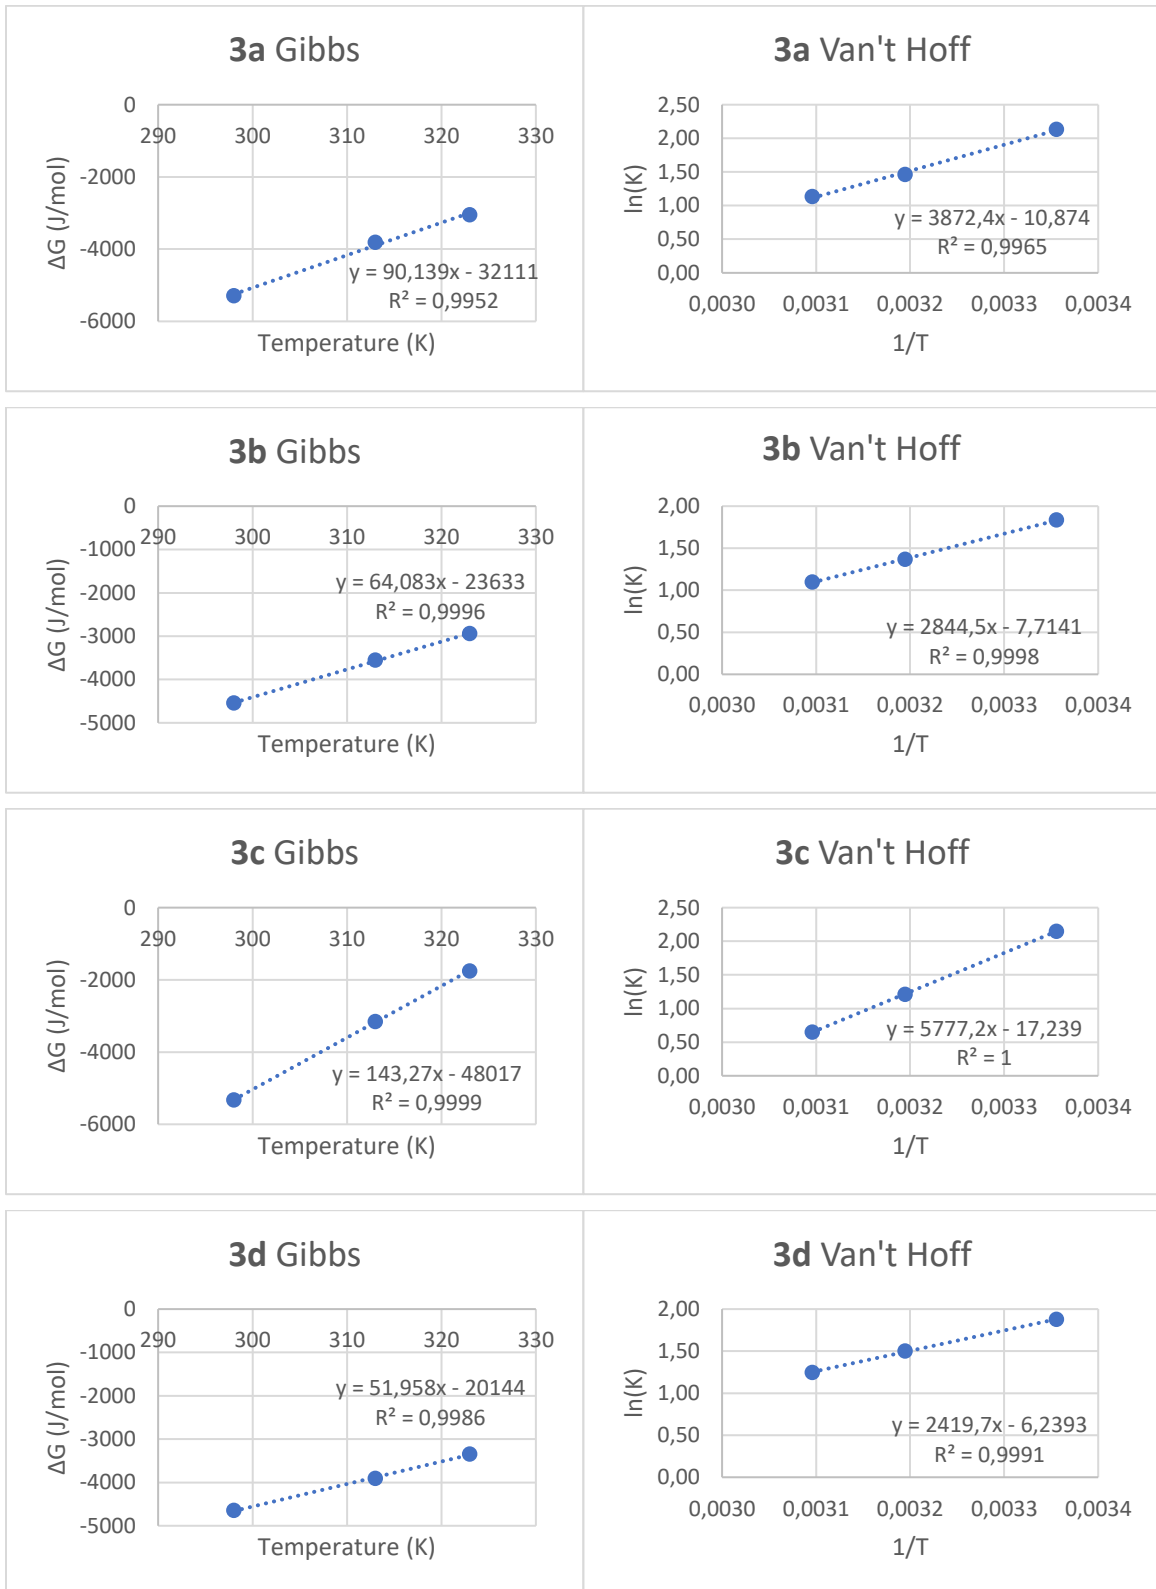

**3e Gibbs**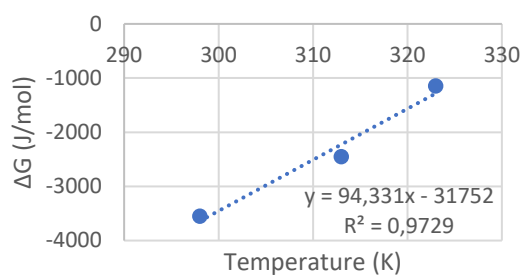**3e Van't Hoff**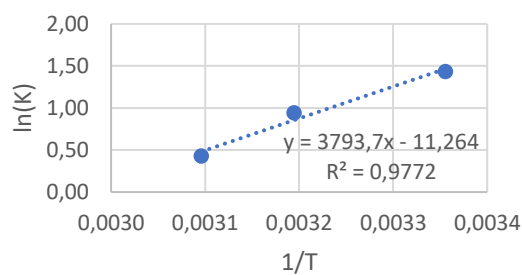**3f Gibbs**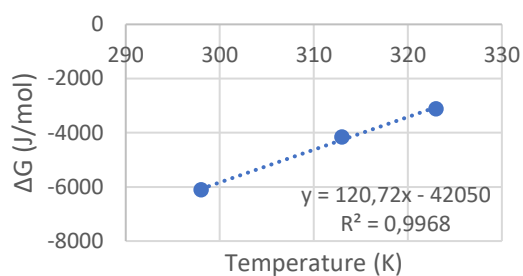**3f Van't Hoff**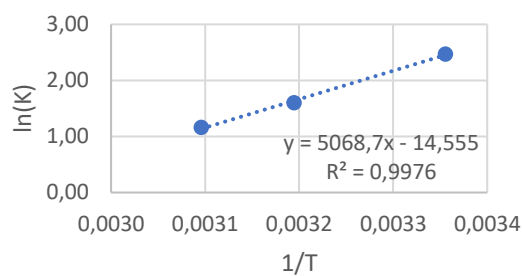**4a Gibbs**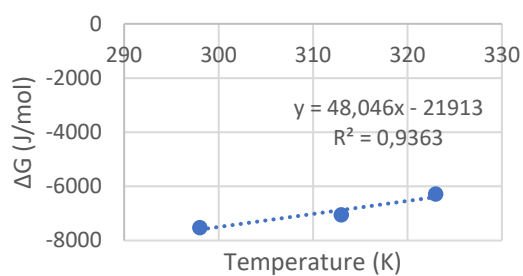**4a Van't Hoff**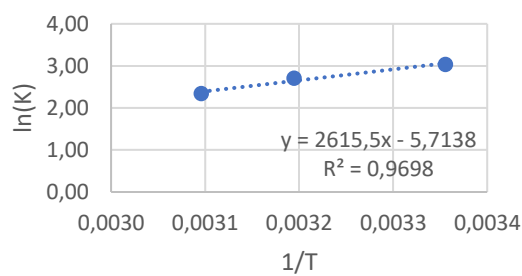**4b Gibbs**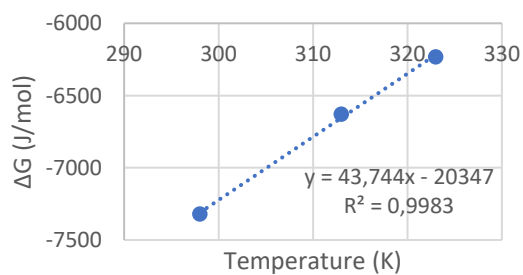**4b Van't Hoff**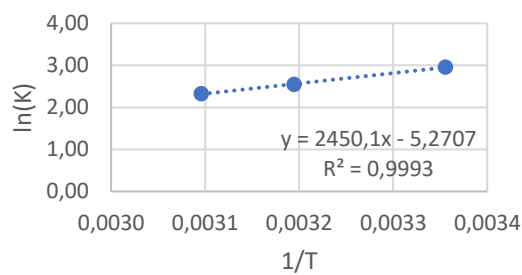

**4c Gibbs**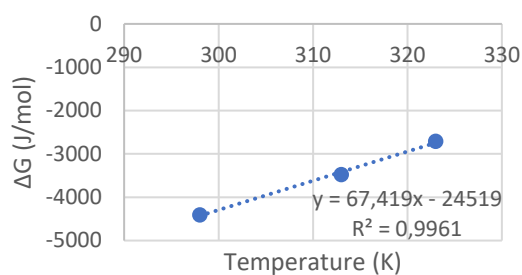**4c Van't Hoff**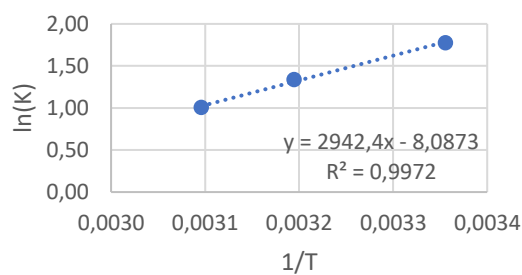**4d Gibbs**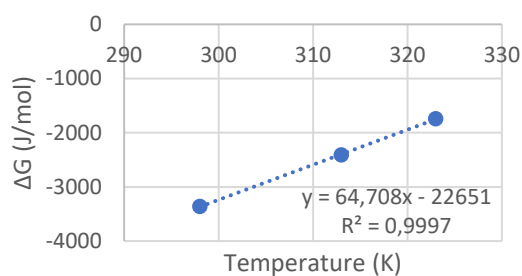**4d Van't Hoff**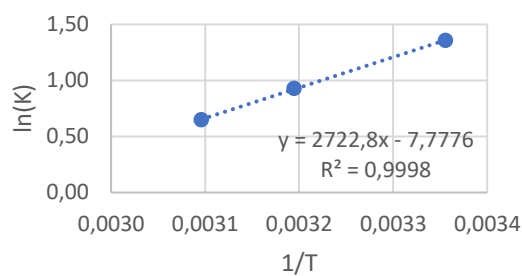**4g Gibbs**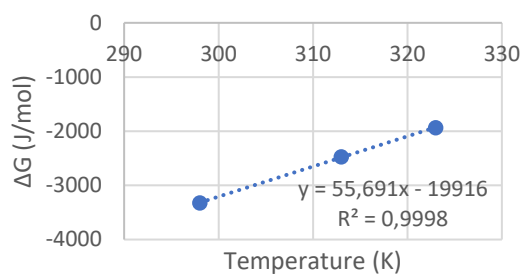**4g Van't Hoff**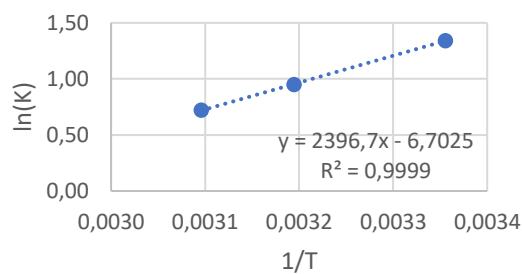**5a Gibbs**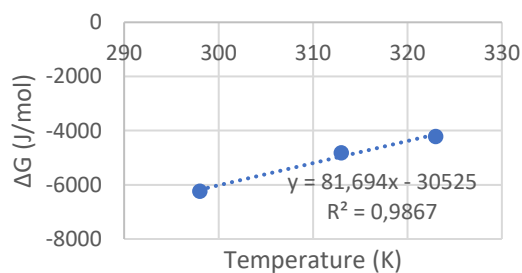**5a Van't Hoff**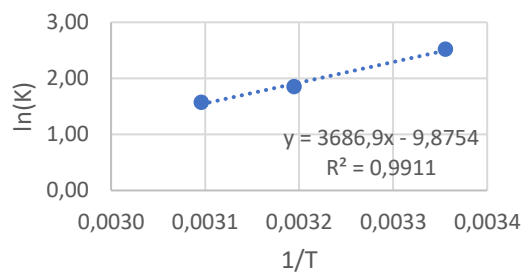

### 5b Gibbs

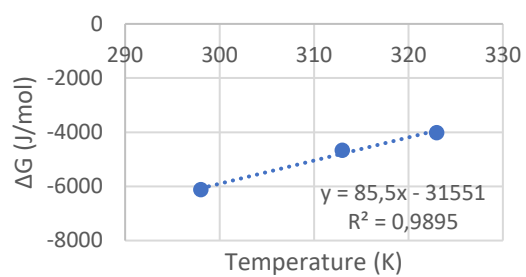

### 5b Van't Hoff

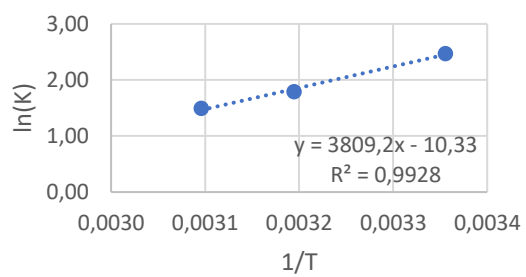

**Gibbs and van' t Hoff plot derived thermodynamic values of tautomerization for compounds 3-5**

|           | T (K) | Gibbs plot values      |                              |                               | Van't Hoff plot values |                              |                               |
|-----------|-------|------------------------|------------------------------|-------------------------------|------------------------|------------------------------|-------------------------------|
|           |       | $\Delta G$<br>(kJ/mol) | $\Delta H_{298}$<br>(kJ/mol) | $\Delta S_{298}$<br>(J/mol·K) | $\Delta G$<br>(kJ/mol) | $\Delta H_{298}$<br>(kJ/mol) | $\Delta S_{298}$<br>(J/mol·K) |
| <b>3a</b> | 298   | -5.29                  |                              |                               | -5.25                  |                              |                               |
|           | 313   | -3.81                  | -32.11                       | -90.14                        | -3.90                  | -32.20                       | -90.41                        |
|           | 323   | -3.05                  |                              |                               | -2.99                  |                              |                               |
| <b>3b</b> | 298   | -4.54                  |                              |                               | -4.54                  |                              |                               |
|           | 313   | -3.56                  | -23.63                       | -64.08                        | -3.58                  | -23.65                       | -64.14                        |
|           | 323   | -2.95                  |                              |                               | -2.93                  |                              |                               |
| <b>3c</b> | 298   | -5.33                  |                              |                               | -5.32                  |                              |                               |
|           | 313   | -3.16                  | -48.02                       | -143.27                       | -3.17                  | -48.03                       | -143.33                       |
|           | 323   | -1.75                  |                              |                               | -1.74                  |                              |                               |
| <b>3d</b> | 298   | -4.65                  |                              |                               | -4.66                  |                              |                               |
|           | 313   | -3.91                  | -20.14                       | -51.96                        | -3.88                  | -20.12                       | -51.87                        |
|           | 323   | -3.34                  |                              |                               | -3.36                  |                              |                               |
| <b>3e</b> | 298   | -3.55                  |                              |                               | -3.63                  |                              |                               |
|           | 313   | -2.45                  | -31.75                       | -94.33                        | -2.23                  | -31.54                       | -93.65                        |
|           | 323   | -1.15                  |                              |                               | -1.29                  |                              |                               |
| <b>3f</b> | 298   | -6.12                  |                              |                               | -6.08                  |                              |                               |
|           | 313   | -4.17                  | -42.05                       | -120.72                       | -4.27                  | -42.14                       | -121.01                       |
|           | 323   | -3.12                  |                              |                               | -3.06                  |                              |                               |
| <b>4a</b> | 298   | -7.52                  |                              |                               | -7.59                  |                              |                               |
|           | 313   | -7.06                  | -21.91                       | -48.05                        | -6.88                  | -21.75                       | -47.50                        |
|           | 323   | -6.29                  |                              |                               | -6.40                  |                              |                               |
| <b>4b</b> | 298   | -7.32                  |                              |                               | -7.31                  |                              |                               |
|           | 313   | -6.63                  | -20.35                       | -43.74                        | -6.65                  | -20.37                       | -43.82                        |
|           | 323   | -6.23                  |                              |                               | -6.22                  |                              |                               |
| <b>4c</b> | 298   | -4.40                  |                              |                               | -4.43                  |                              |                               |
|           | 313   | -3.48                  | -24.52                       | -67.42                        | -3.42                  | -24.46                       | -67.24                        |
|           | 323   | -2.71                  |                              |                               | -2.75                  |                              |                               |
| <b>4d</b> | 298   | -3.36                  |                              |                               | -3.37                  |                              |                               |
|           | 313   | -2.41                  | -22.65                       | -64.71                        | -2.40                  | -22.64                       | -64.66                        |
|           | 323   | -1.74                  |                              |                               | -1.75                  |                              |                               |
| <b>4g</b> | 298   | -3.33                  |                              |                               | -3.32                  |                              |                               |
|           | 313   | -2.47                  | -19.92                       | -55.69                        | -2.49                  | -19.93                       | -55.72                        |
|           | 323   | -1.94                  |                              |                               | -1.93                  |                              |                               |
| <b>5a</b> | 298   | -6.24                  |                              |                               | -6.19                  |                              |                               |
|           | 313   | -4.82                  | -30.53                       | -81.69                        | -4.95                  | -30.65                       | -82.10                        |
|           | 323   | -4.22                  |                              |                               | -4.13                  |                              |                               |
| <b>5b</b> | 298   | -6.12                  |                              |                               | -6.08                  |                              |                               |
|           | 313   | -4.66                  | -31.55                       | -85.50                        | -4.79                  | -31.67                       | -85.88                        |
|           | 323   | -4.01                  |                              |                               | -3.93                  |                              |                               |

**$^1\text{H}$  NMR spectra of tetrazoles 3-5 in  $\text{CDCl}_3$  at variable temperatures**

5-(Butylthio)pyrido[2,3-*e*]tetrazolo[1,5-*a*]pyrimidine (**3a**):

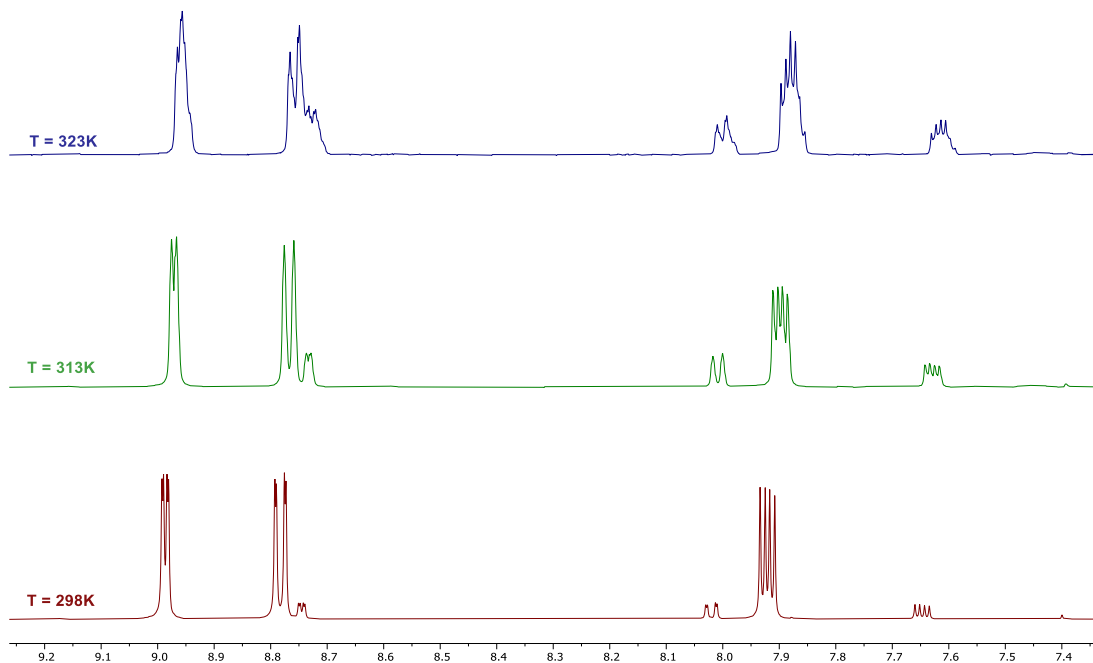

5-(Phenethylthio)pyrido[2,3-*e*]tetrazolo[1,5-*a*]pyrimidine (**3b**):

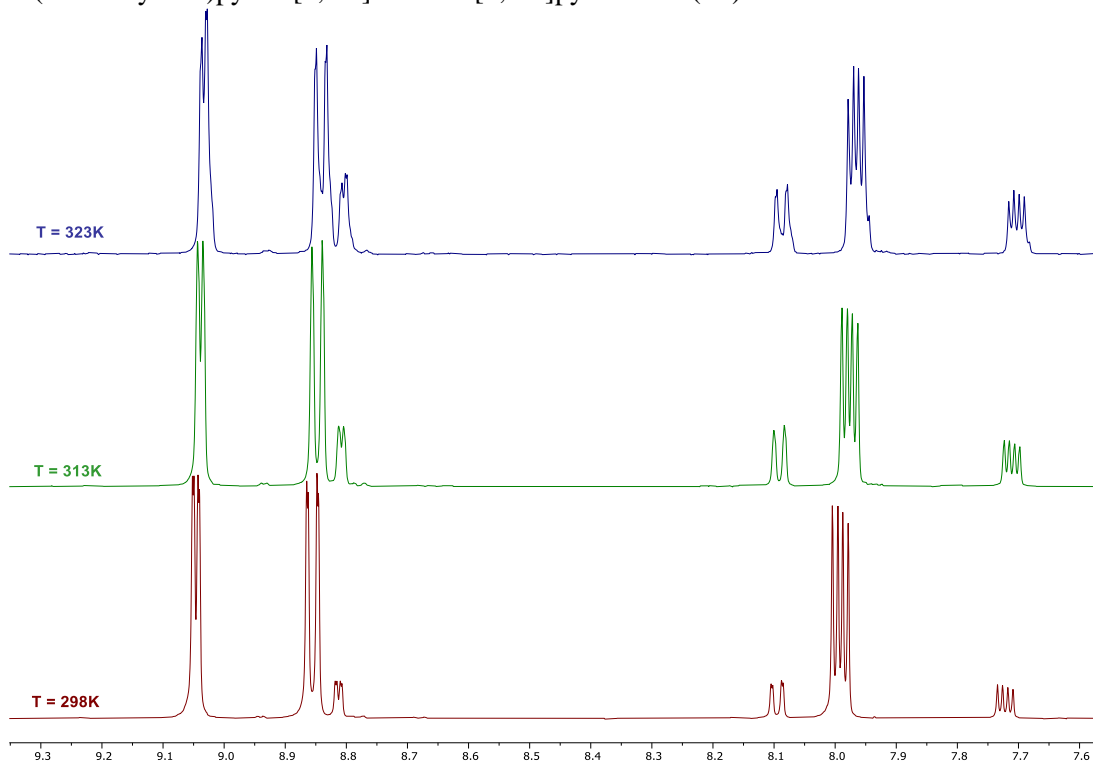



5-(*p*-Tolylthio)pyrido[2,3-*e*]tetrazolo[1,5-*a*]pyrimidine (**3c**):

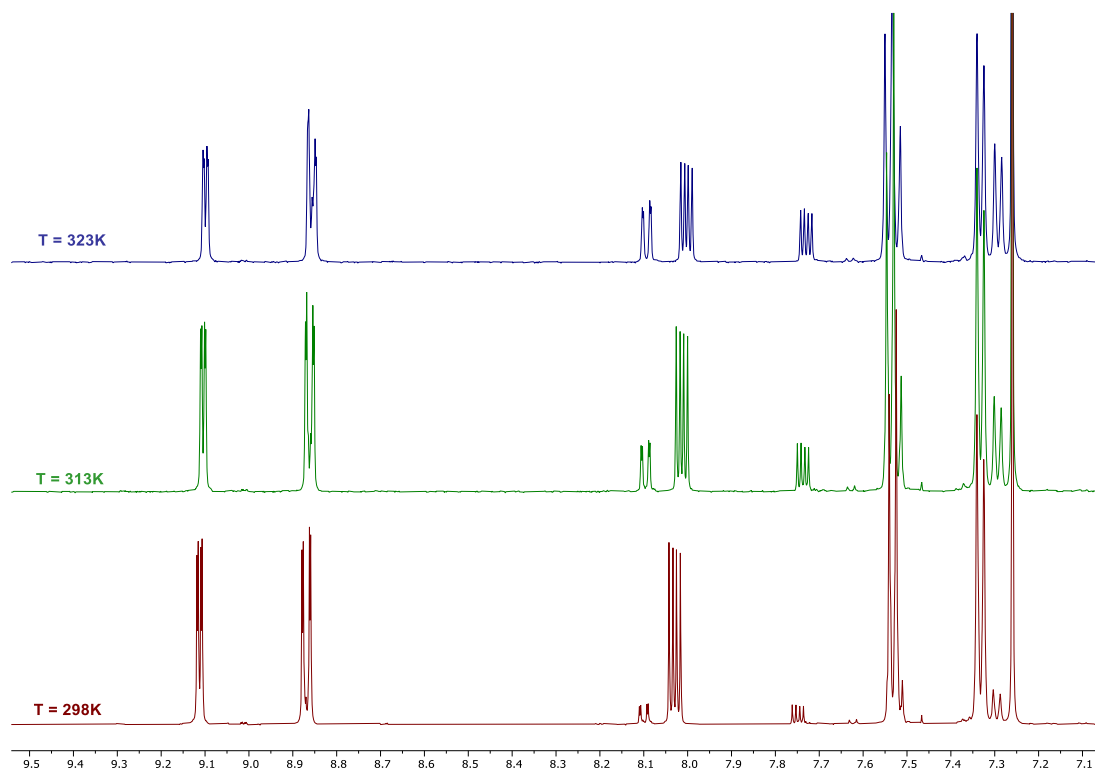

5-(Isopropylthio)pyrido[2,3-*e*]tetrazolo[1,5-*a*]pyrimidine (**3d**):

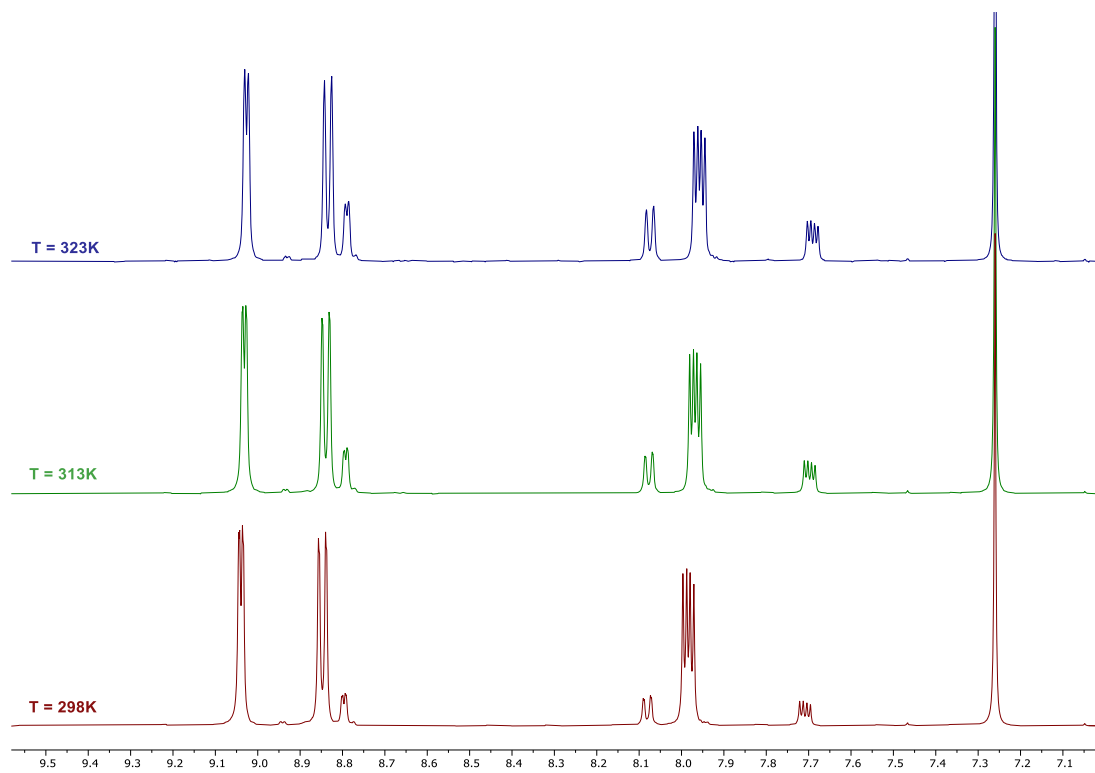

5-(Phenylthio)pyrido[2,3-*e*]tetrazolo[1,5-*a*]pyrimidine (**3e**):

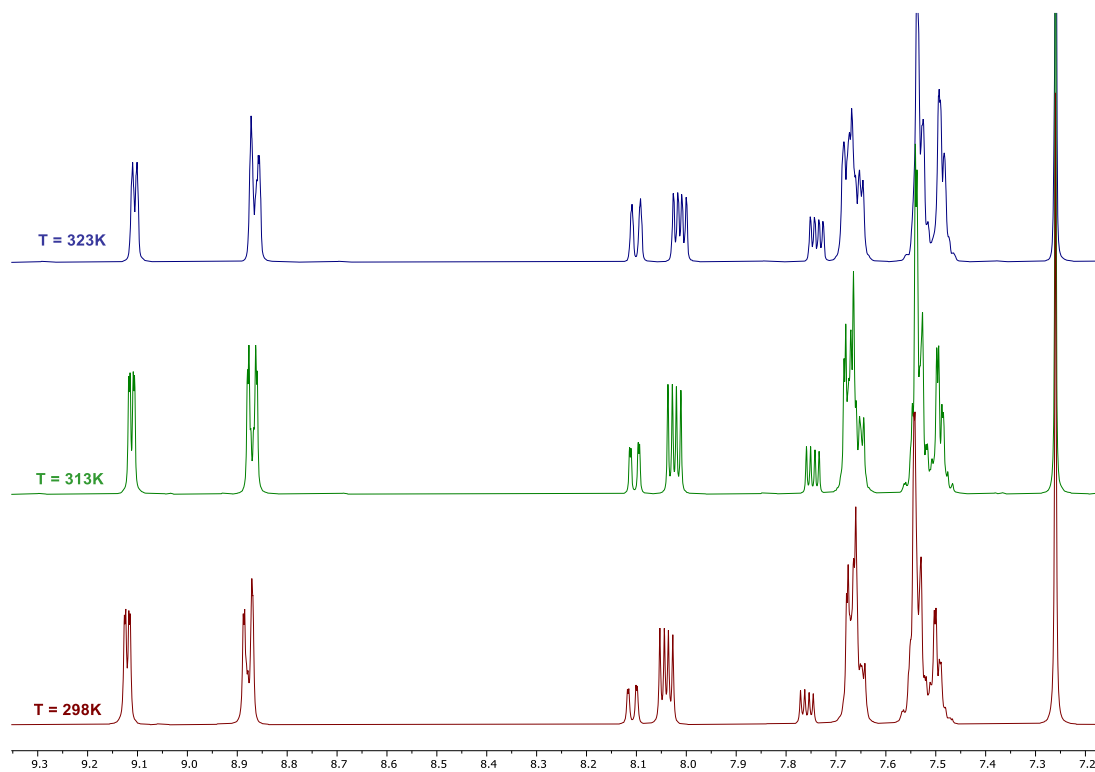

5-(Cyclohexylthio)pyrido[2,3-*e*]tetrazolo[1,5-*a*]pyrimidine (**3f**):

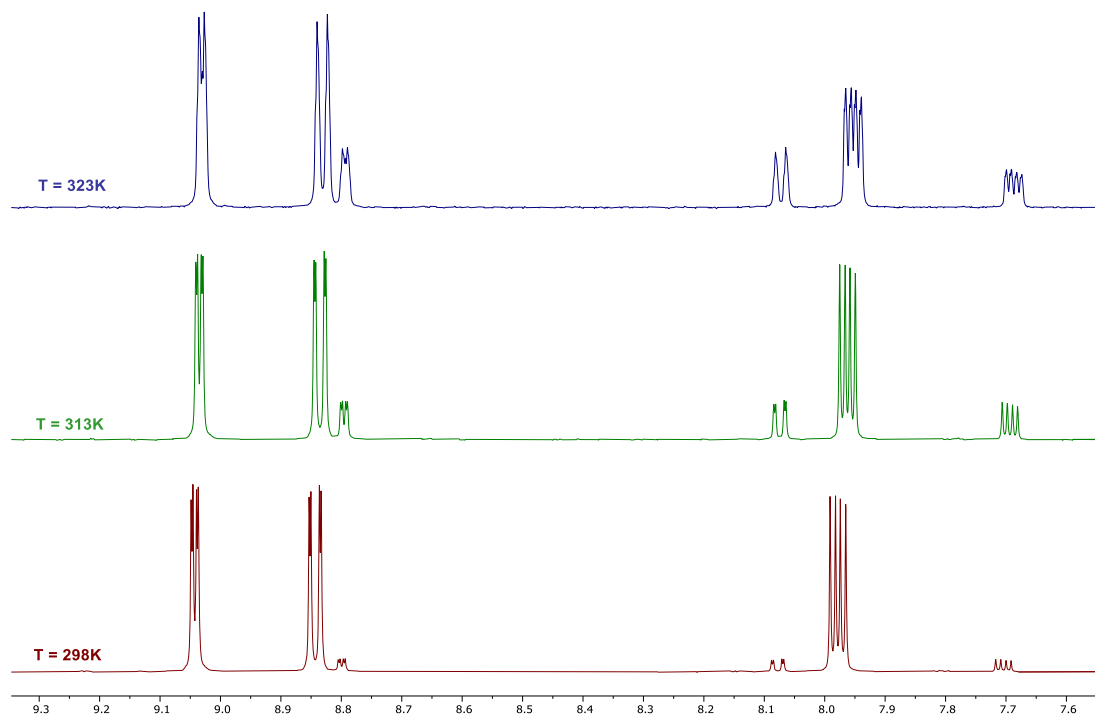

*N*-(4-Methoxybenzyl)pyrido[2,3-*e*]tetrazolo[1,5-*a*]pyrimidin-5-amine (**4a**):

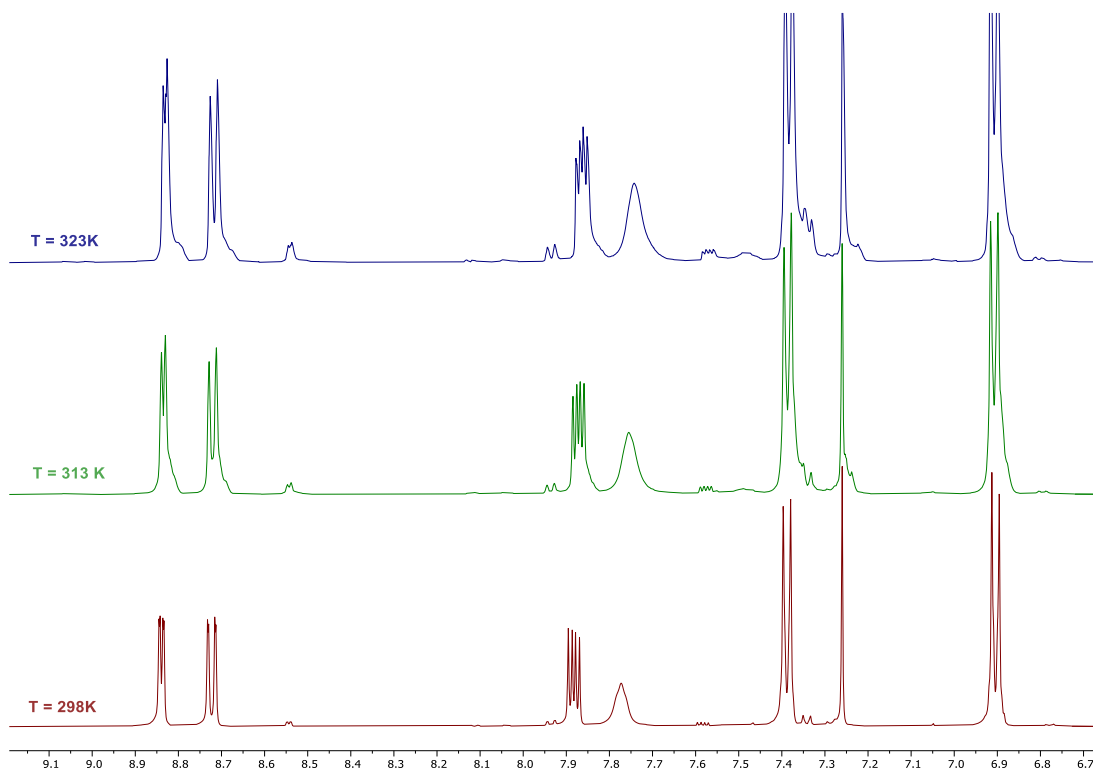

*N*-Hexylpyrido[2,3-*e*]tetrazolo[1,5-*a*]pyrimidin-5-amine (**4b**):

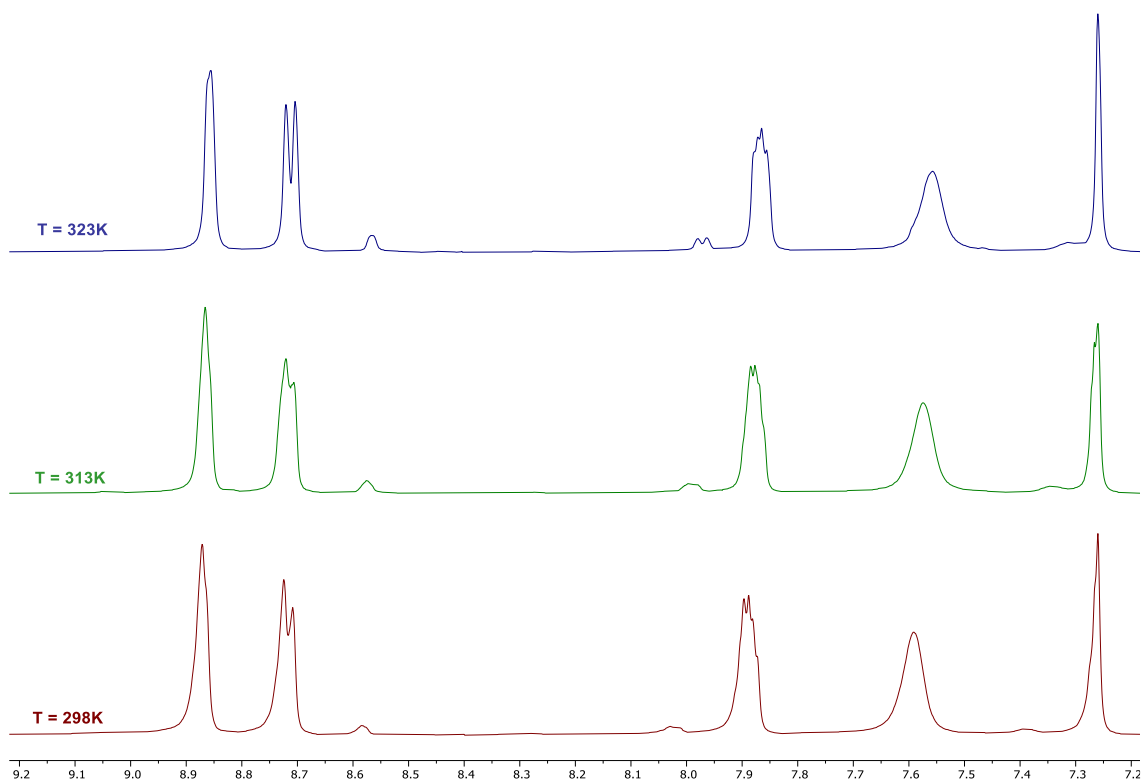

5-(Piperidin-1-yl)pyrido[2,3-*e*]tetrazolo[1,5-*a*]pyrimidine (**4c**):

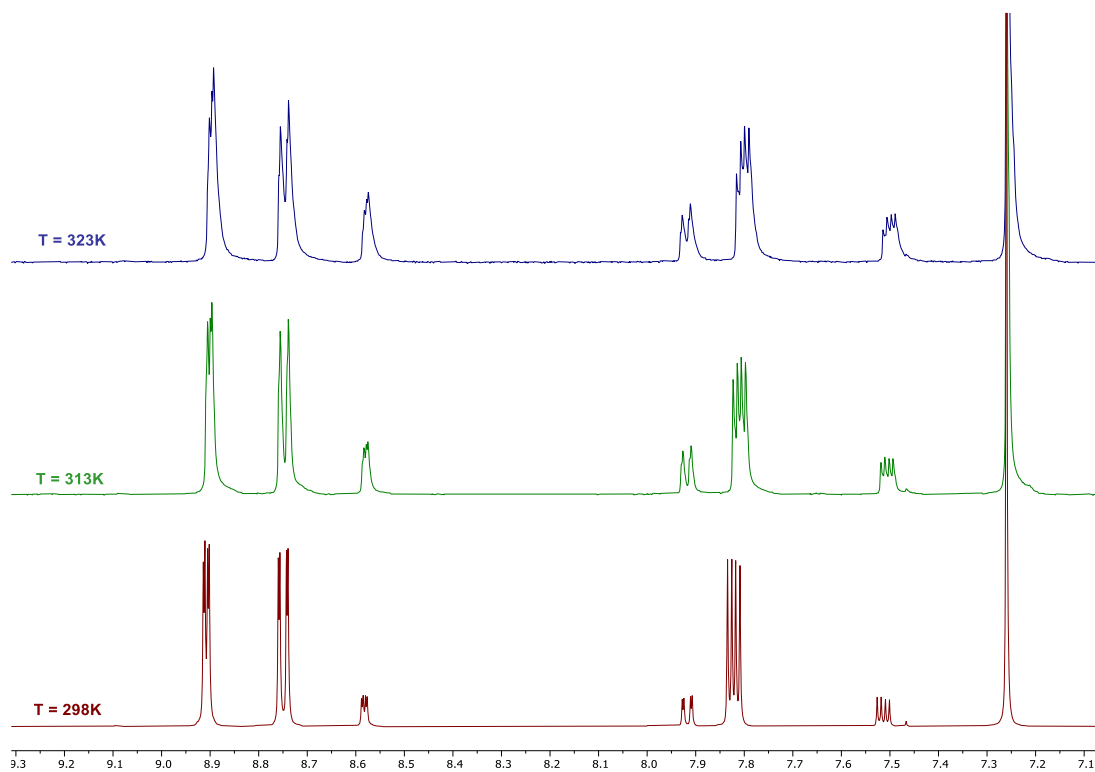

4-(Pyrido[2,3-*e*]tetrazolo[1,5-*a*]pyrimidin-5-yl)morpholine (**4d**):

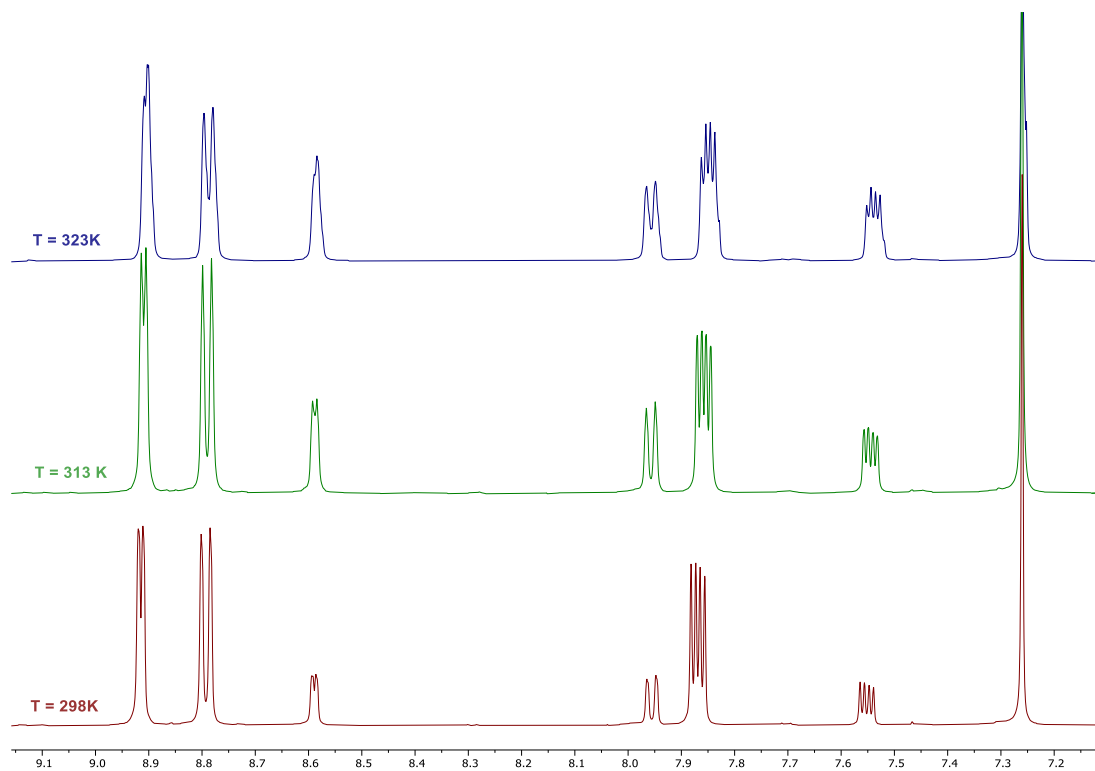

5-(4-Methylpiperazin-1-yl)pyrido[2,3-*e*]tetrazolo[1,5-*a*]pyrimidine (**4g**):

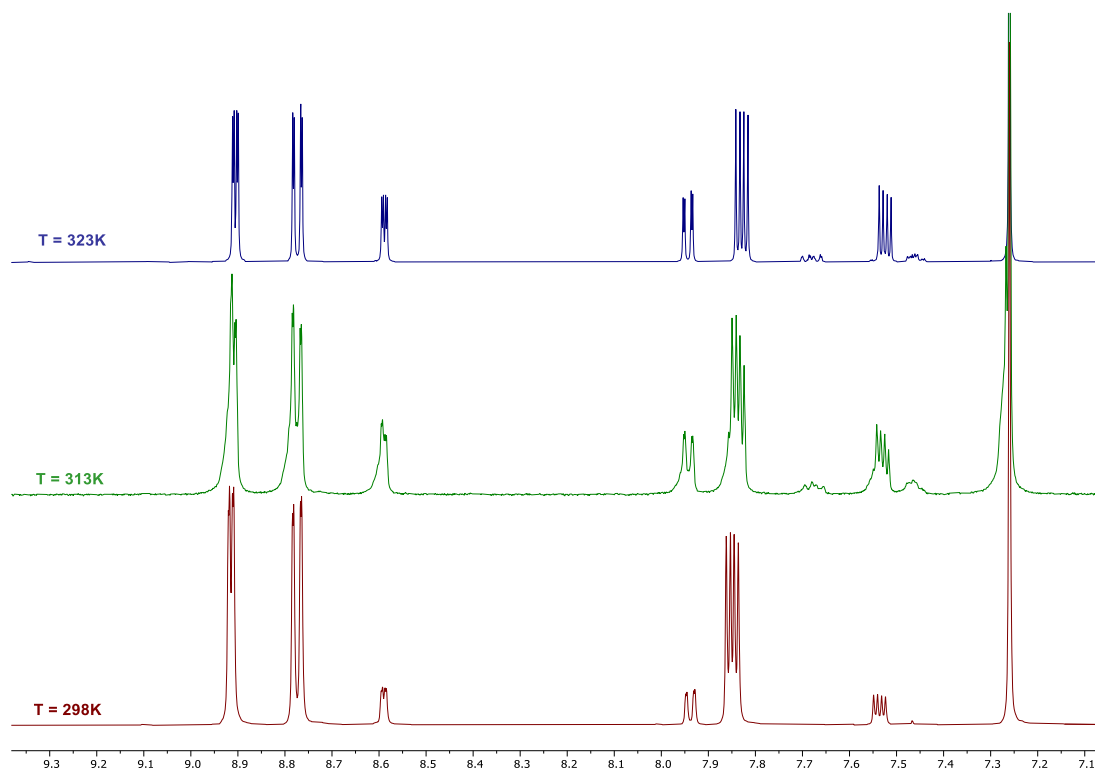

5-(Cyclopentyloxy)pyrido[2,3-*e*]tetrazolo[1,5-*a*]pyrimidine (**5a**):

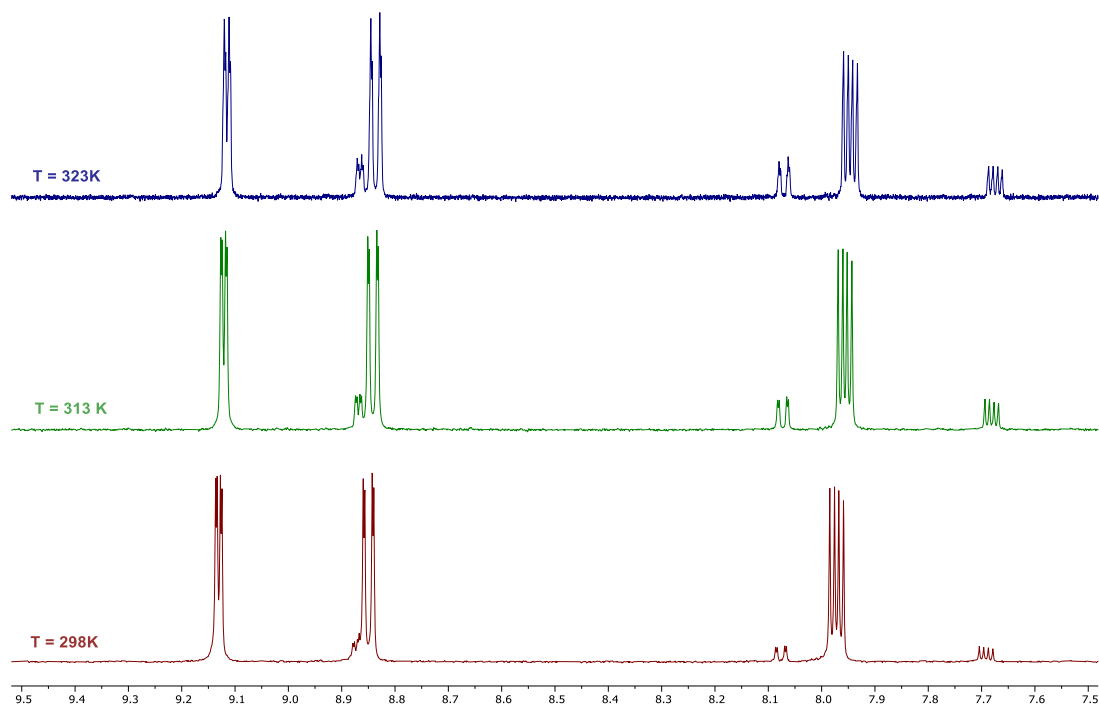

5-Propoxy-pyrido[2,3-*e*]tetrazolo[1,5-*a*]pyrimidine (**5b**):

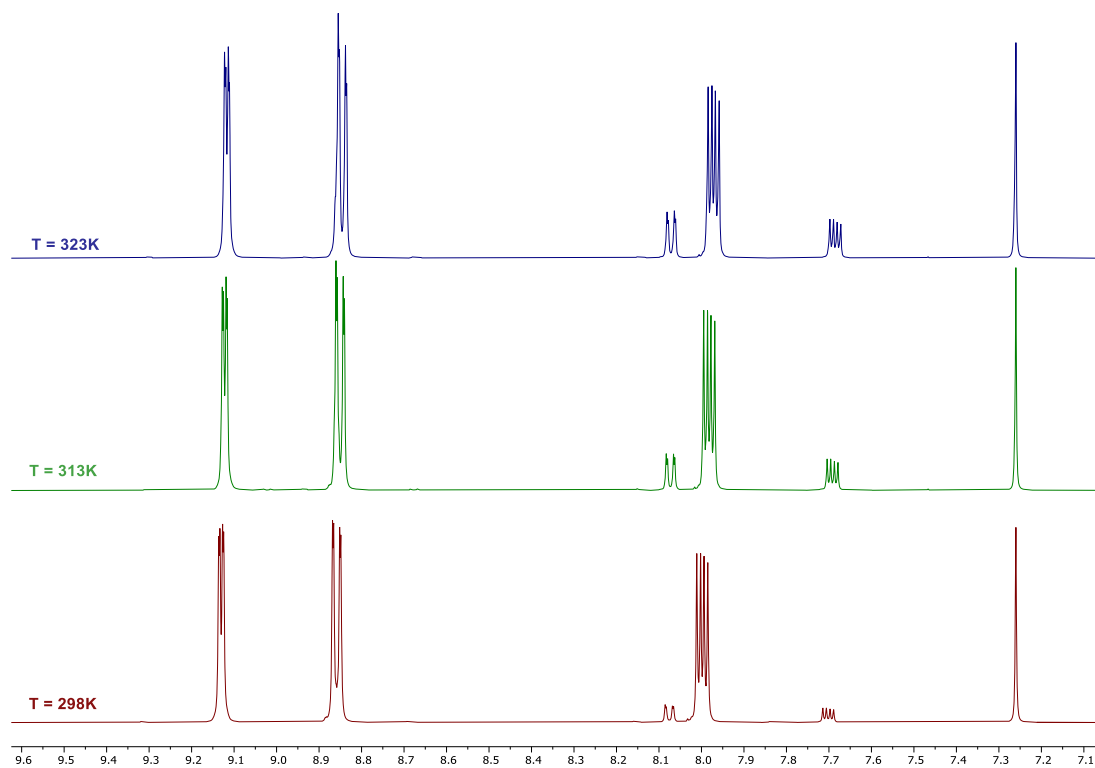

## $^1\text{H}$ , $^{13}\text{C}$ and $^{31}\text{P}$ NMR for obtained compounds

2,4-Diazidopyrido[3,2-*d*]pyrimidine (**2**):

$^1\text{H}$  NMR (500 MHz,  $\text{CF}_3\text{COOD}$ )

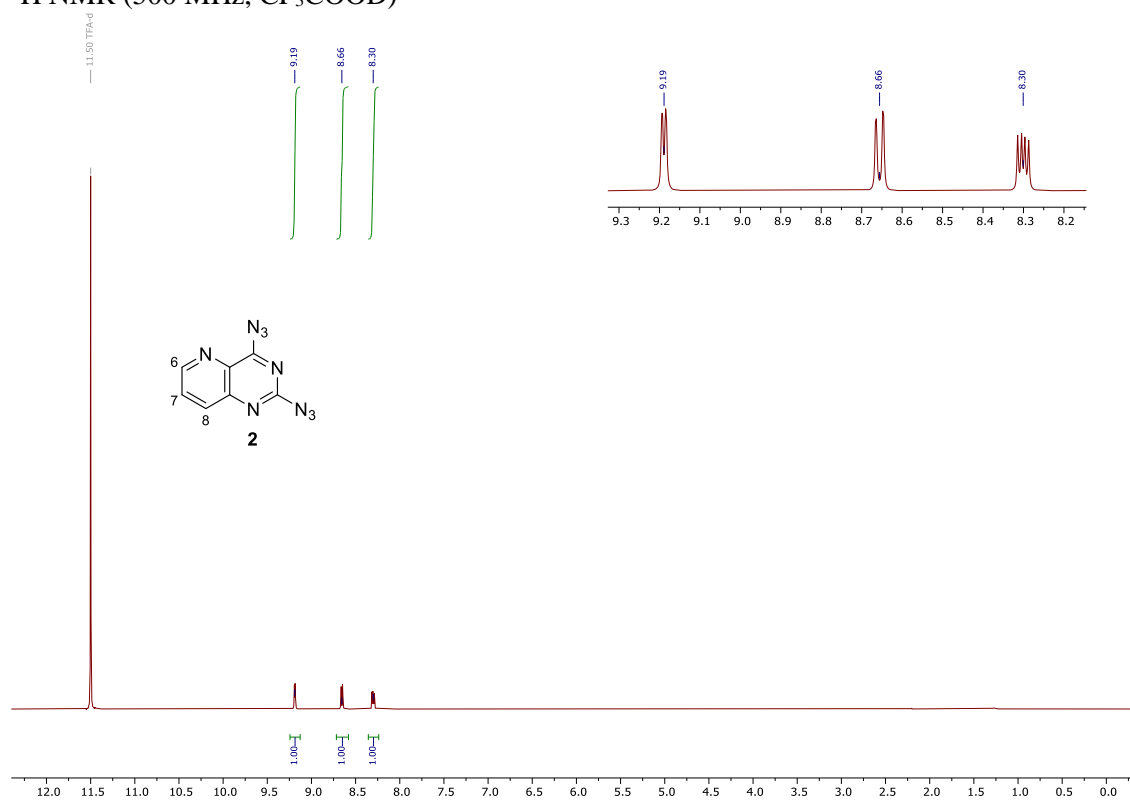

$^{13}\text{C}$  NMR (125 MHz,  $\text{CF}_3\text{COOD}$ )

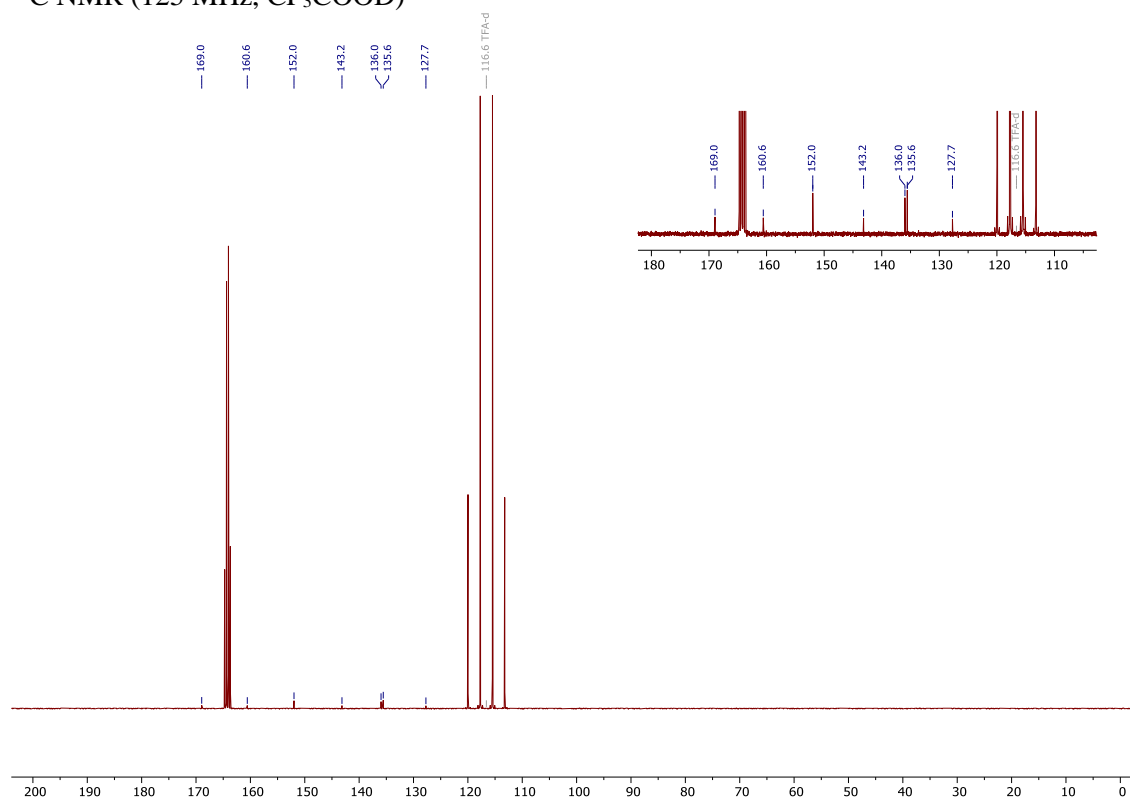

$^1\text{H}$  NMR (500 MHz,  $\text{DMSO}-d_6$ )

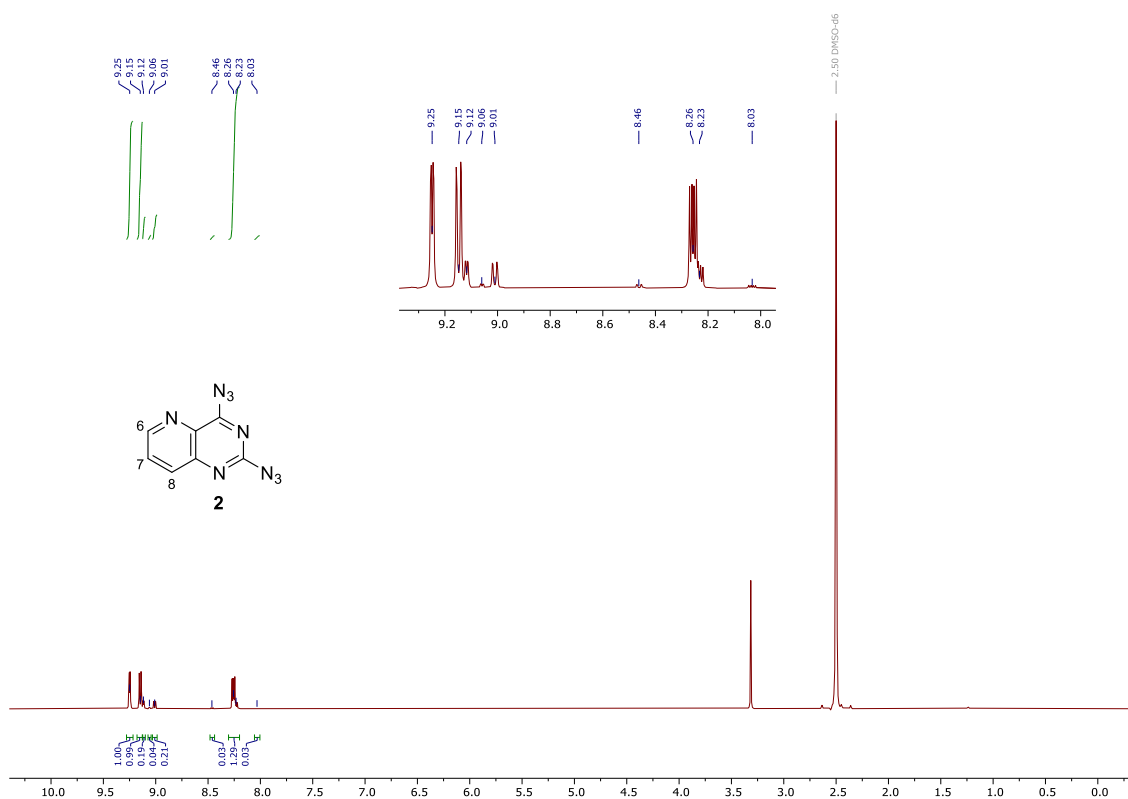

$^1\text{H}$  NMR (500 MHz,  $\text{CDCl}_3$ )

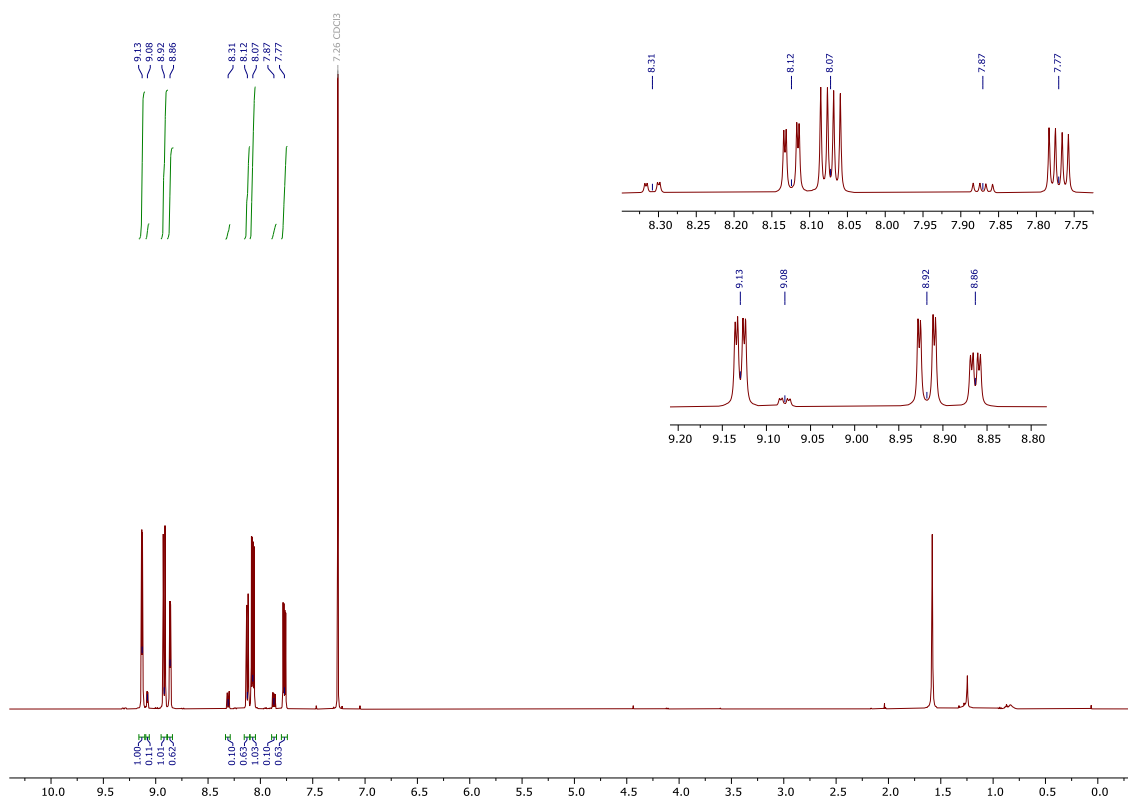



5-(Butylthio)pyrido[2,3-*e*]tetrazolo[1,5-*a*]pyrimidine (**3a**):

$^1\text{H}$  NMR (500 MHz,  $\text{DMSO-}d_6$ )

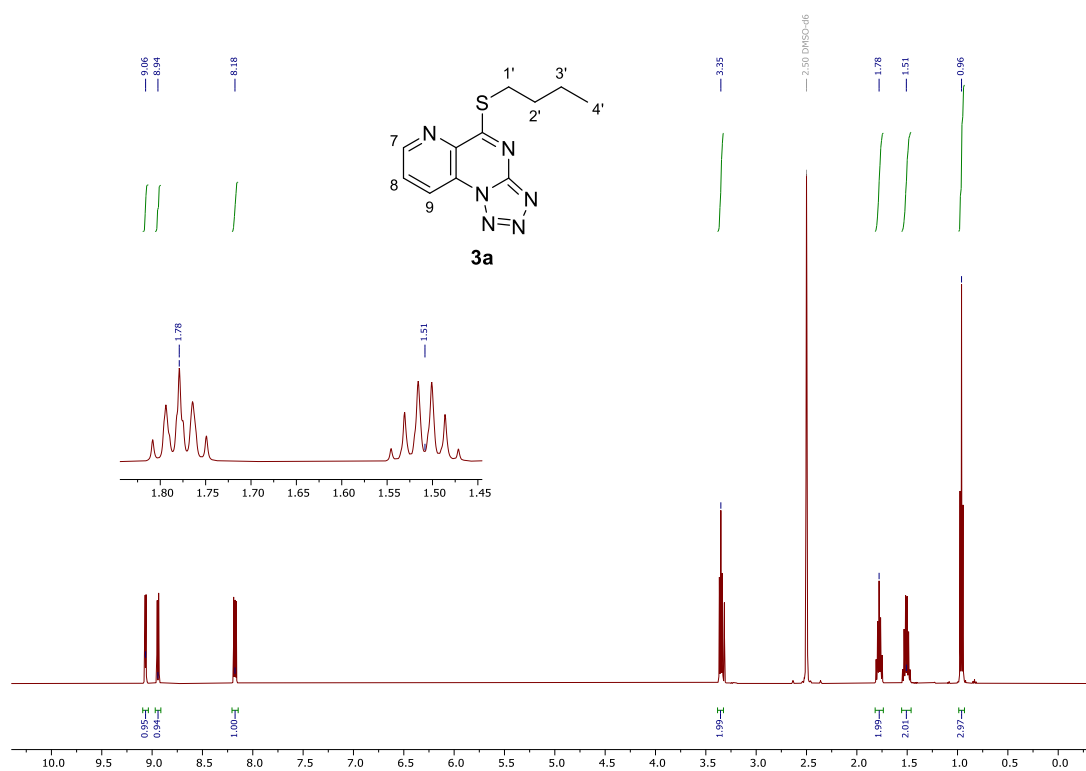

$^{13}\text{C}$  NMR (125 MHz,  $\text{DMSO-}d_6$ )

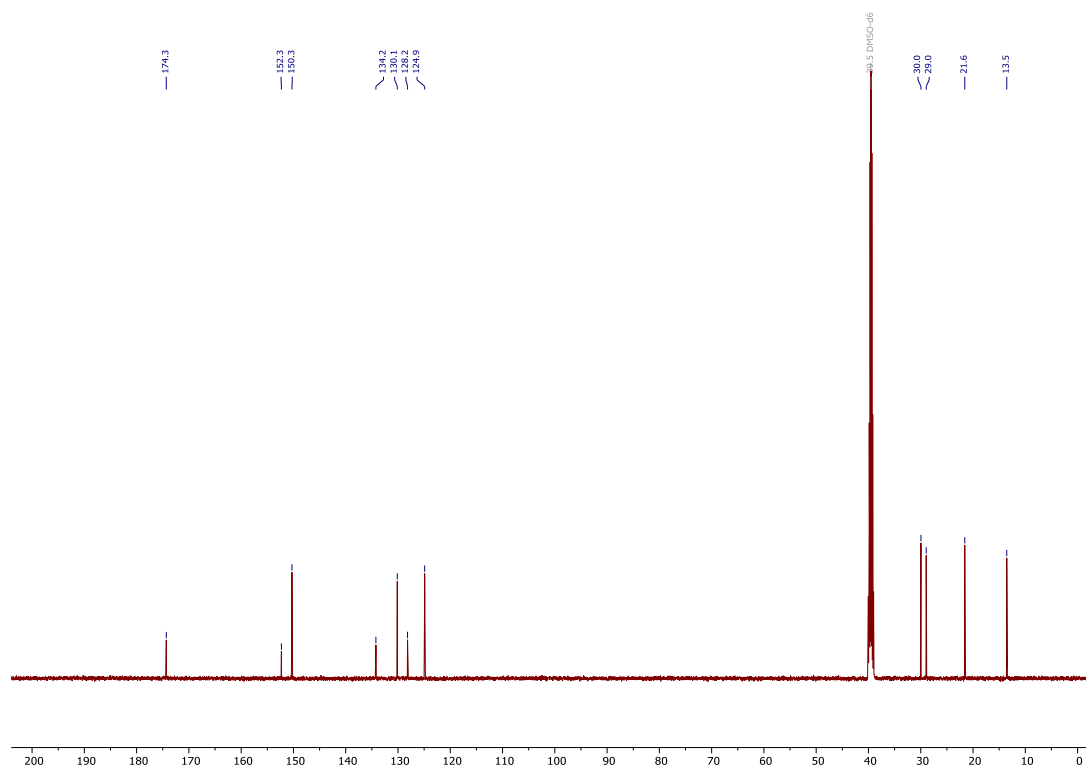

5-(Butylthio)pyrido[2,3-*e*]tetrazolo[1,5-*a*]pyrimidine (**3a**) and 2-azido-4-(butylthio)pyrido[3,2-*d*]pyrimidine (**3aA**):

$^1\text{H}$  NMR (500 MHz,  $\text{CDCl}_3$ )

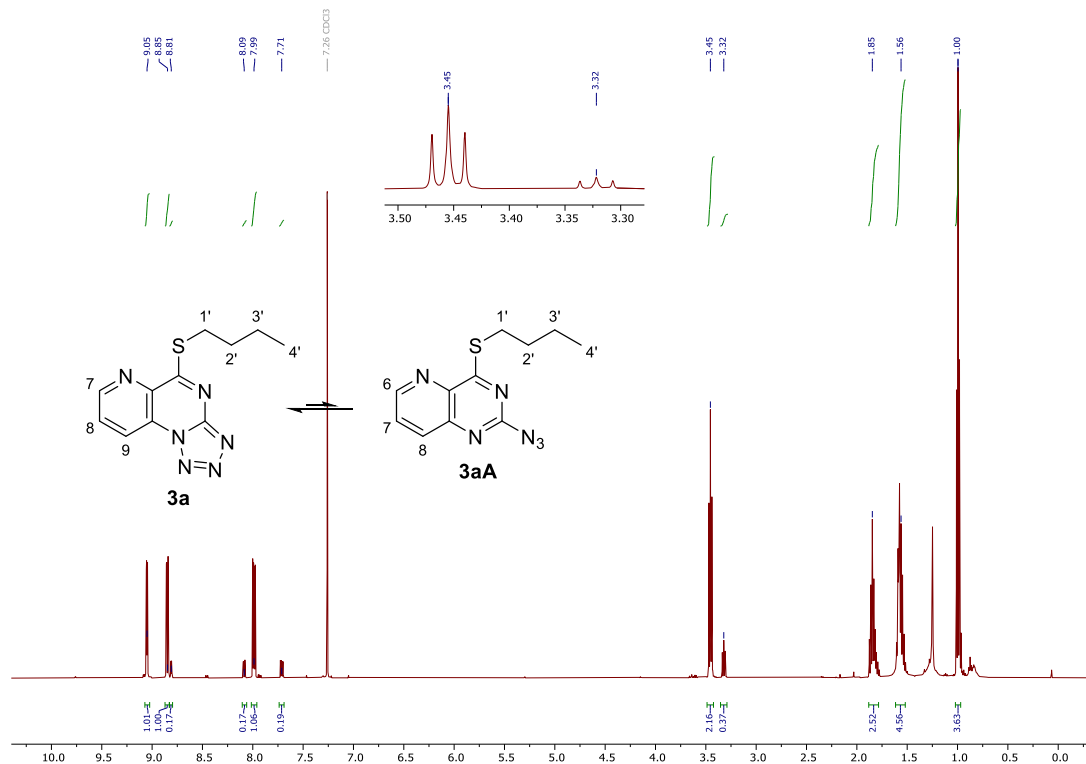

5-(Phenethylthio)pyrido[2,3-*e*]tetrazolo[1,5-*a*]pyrimidine (**3b**):

$^1\text{H}$  NMR (500 MHz,  $\text{DMSO-}d_6$ )

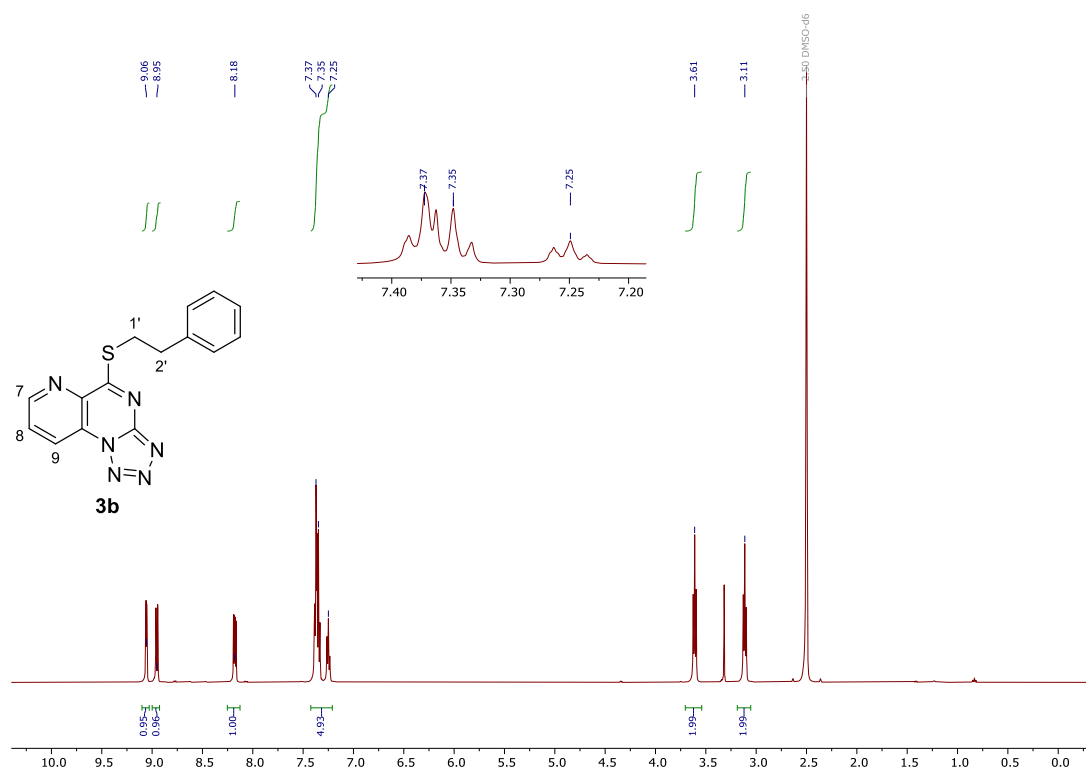

$^{13}\text{C}$  NMR (125 MHz,  $\text{DMSO-}d_6$ )

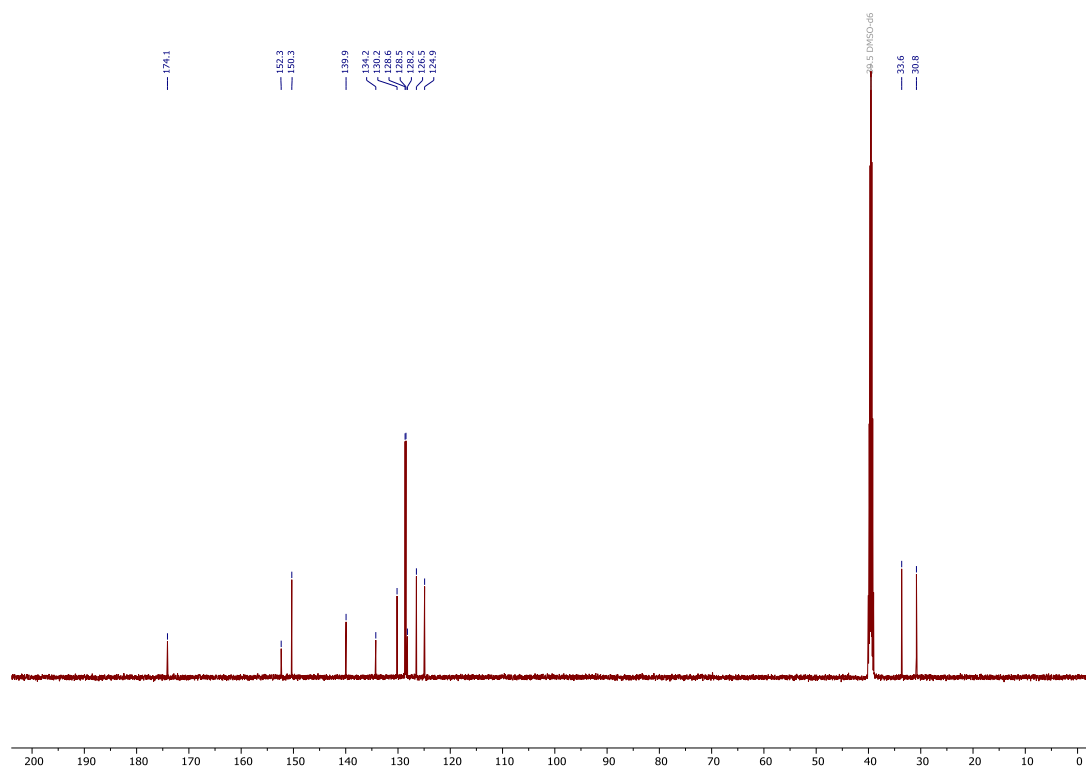

5-(Phenethylthio)pyrido[2,3-*e*]tetrazolo[1,5-*a*]pyrimidine (**3b**) and 2-azido-4-(phenethylthio)pyrido[3,2-*d*]pyrimidine (**3bA**):

<sup>1</sup>H NMR (500 MHz, CDCl<sub>3</sub>)

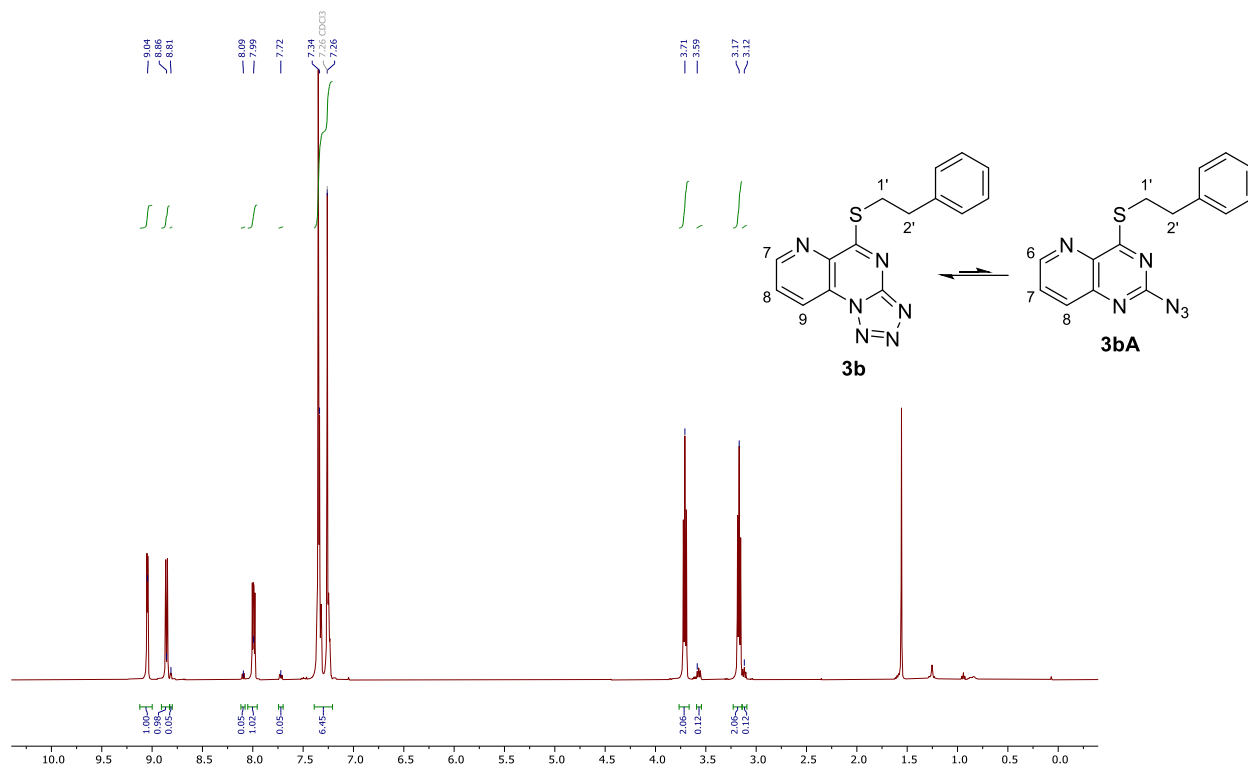

5-(*p*-Tolylthio)pyrido[2,3-*e*]tetrazolo[1,5-*a*]pyrimidine (**3c**):

$^1\text{H}$  NMR (500 MHz,  $\text{DMSO-}d_6$ )

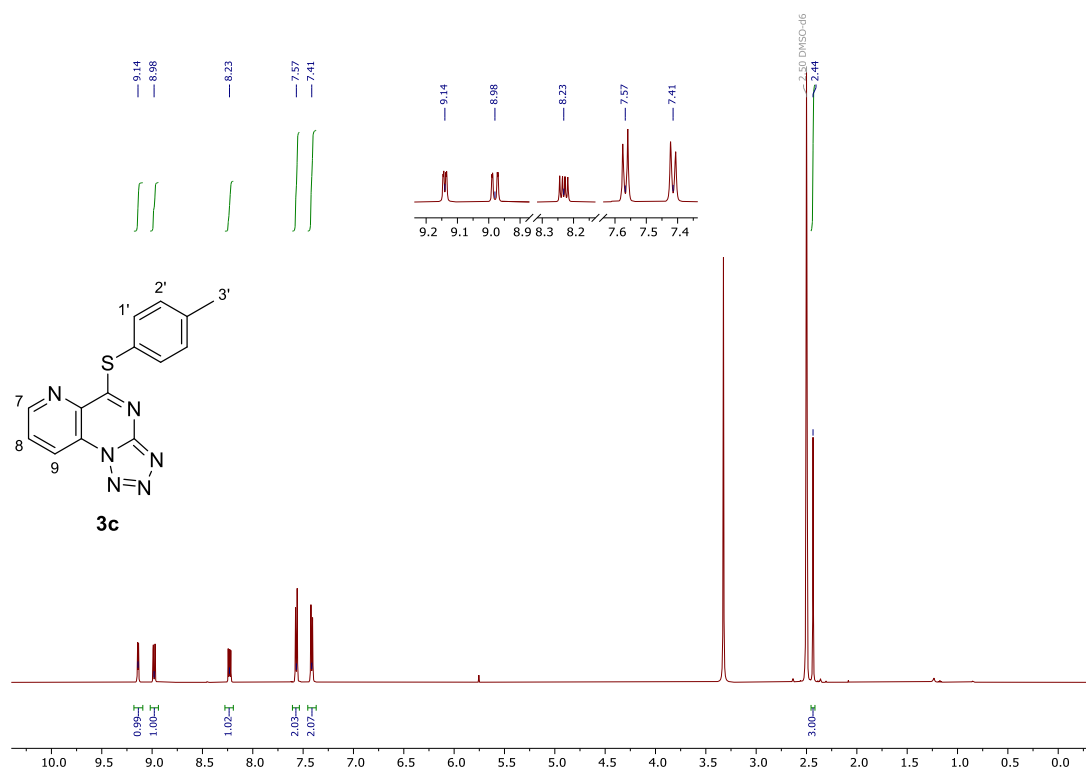

$^{13}\text{C}$  NMR (125 MHz,  $\text{DMSO-}d_6$ )

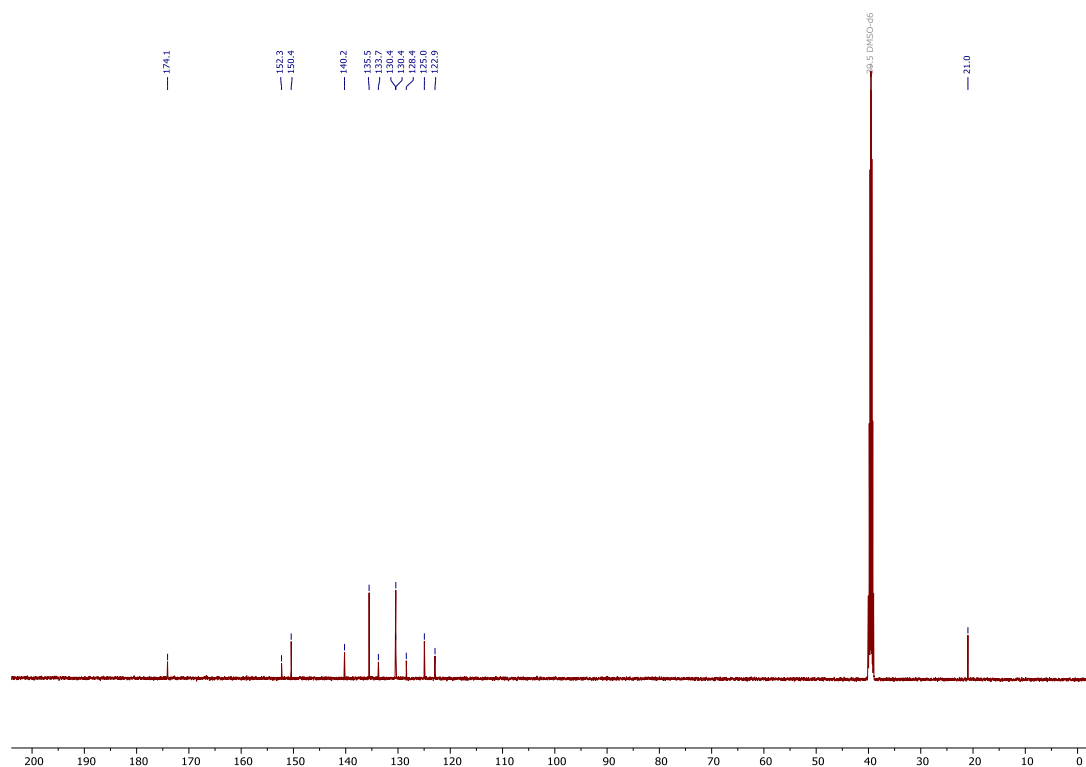

<sup>1</sup>H NMR (500 MHz, CDCl<sub>3</sub>)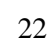

5-(Isopropylthio)pyrido[2,3-*e*]tetrazolo[1,5-*a*]pyrimidine (**3d**):

$^1\text{H}$  NMR (500 MHz,  $\text{DMSO-}d_6$ )

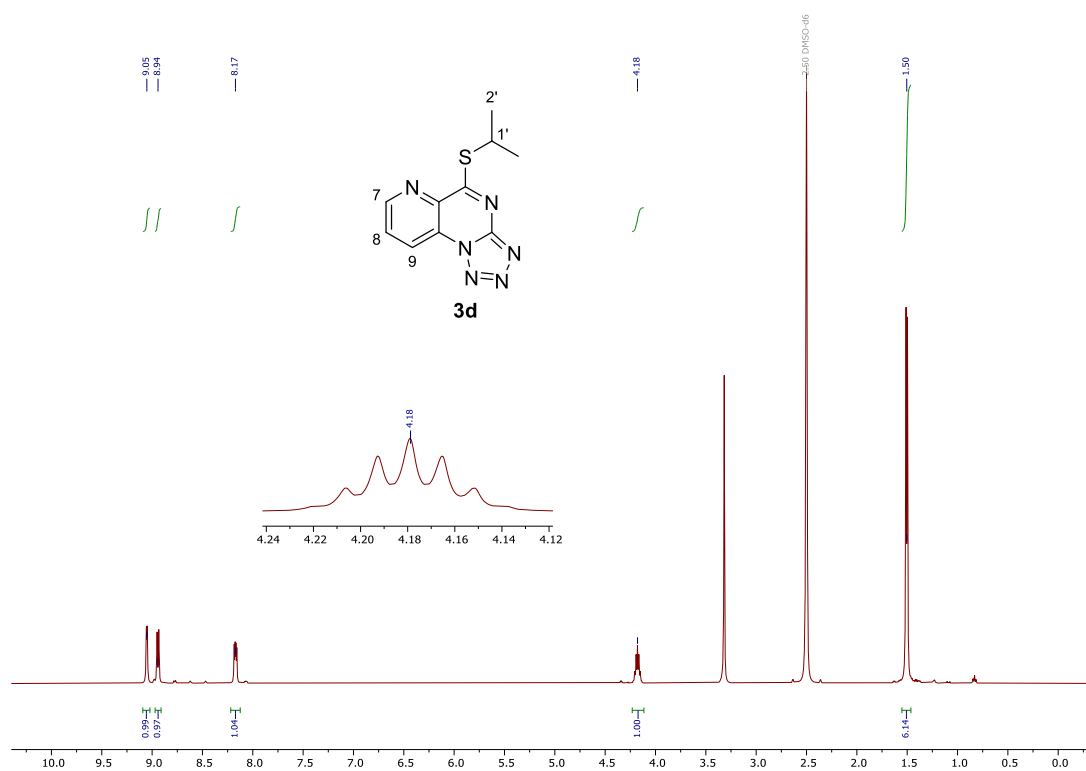

$^{13}\text{C}$  NMR (125 MHz,  $\text{DMSO-}d_6$ )

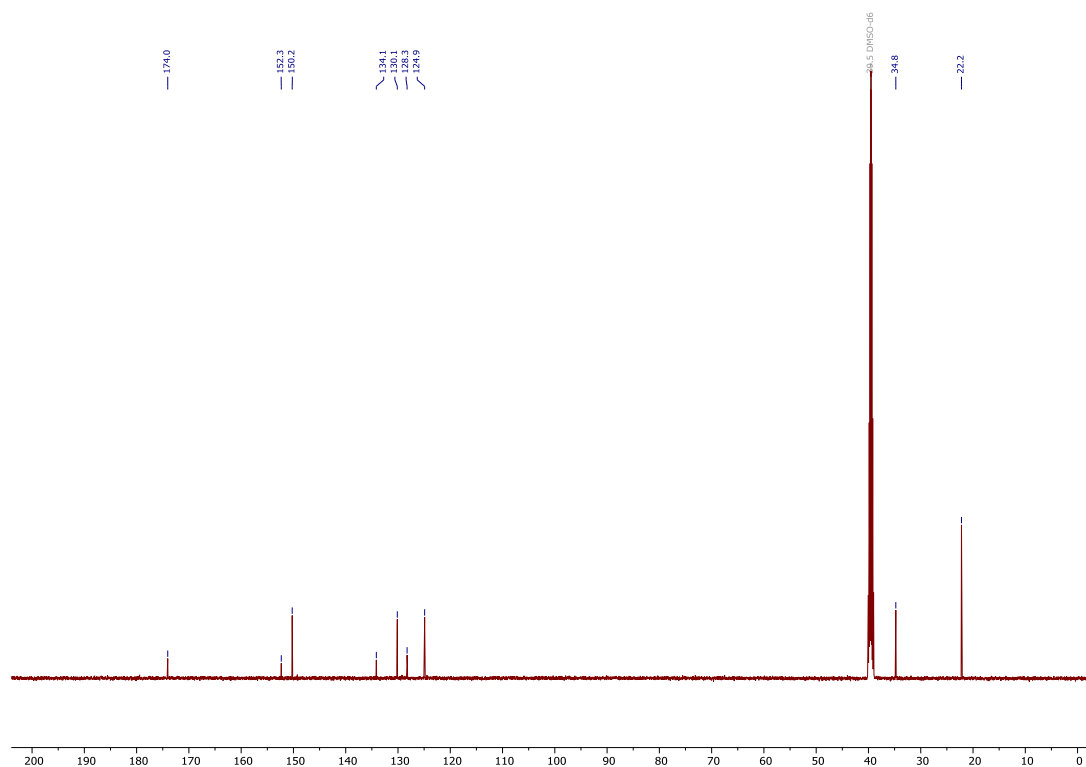

5-(Isopropylthio)pyrido[2,3-*e*]tetrazolo[1,5-*a*]pyrimidine (**3d**) and 2-azido-4-(isopropylthio)pyrido[3,2-*d*]pyrimidine (**3dA**):

$^1\text{H}$  NMR (500 MHz,  $\text{CDCl}_3$ )

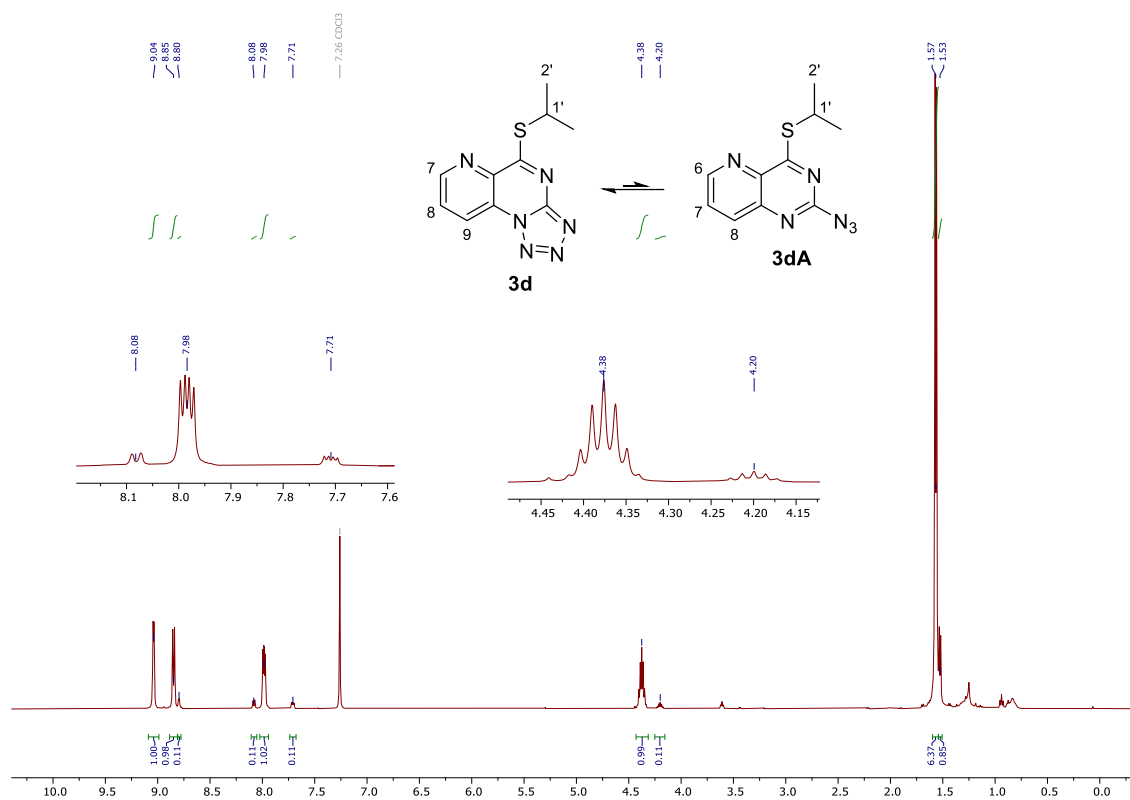



5-(Phenylthio)pyrido[2,3-*e*]tetrazolo[1,5-*a*]pyrimidine (**3e**):

$^1\text{H}$  NMR (500 MHz,  $\text{DMSO-}d_6$ )

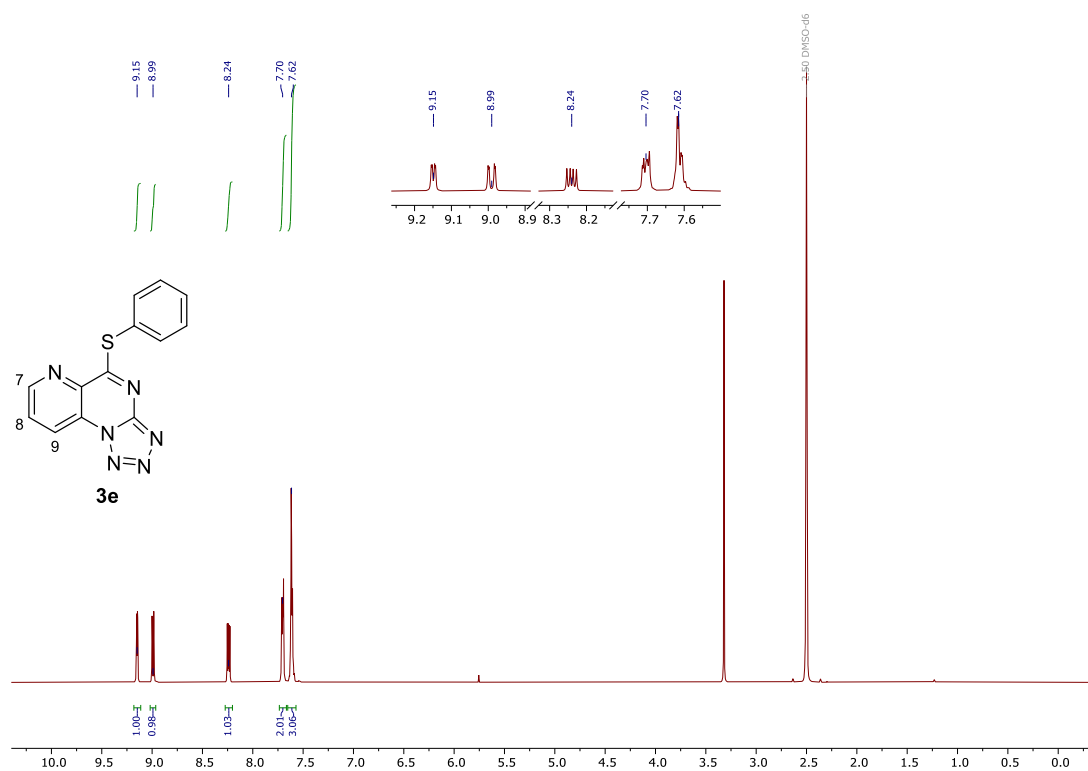

$^{13}\text{C}$  NMR (125 MHz,  $\text{DMSO-}d_6$ )

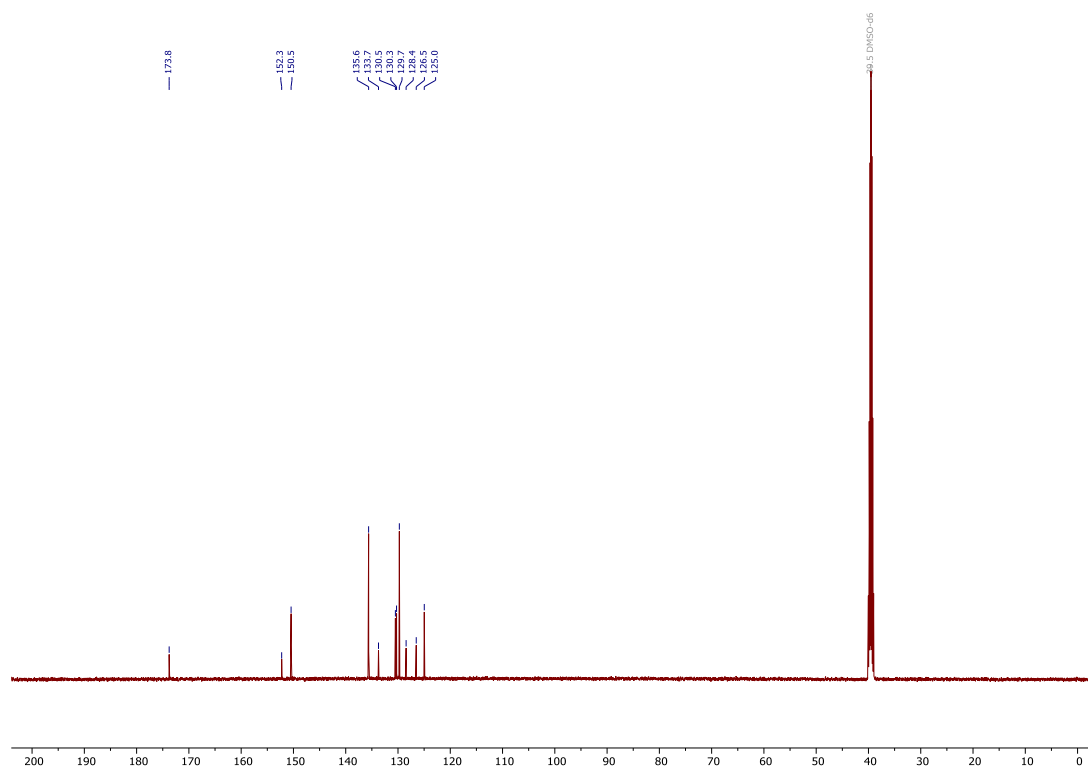

5-(Phenylthio)pyrido[2,3-*e*]tetrazolo[1,5-*a*]pyrimidine (**3e**) and 2-azido-4-(phenylthio)pyrido[3,2-*d*]pyrimidine (**3eA**):

<sup>1</sup>H NMR (500 MHz, CDCl<sub>3</sub>)

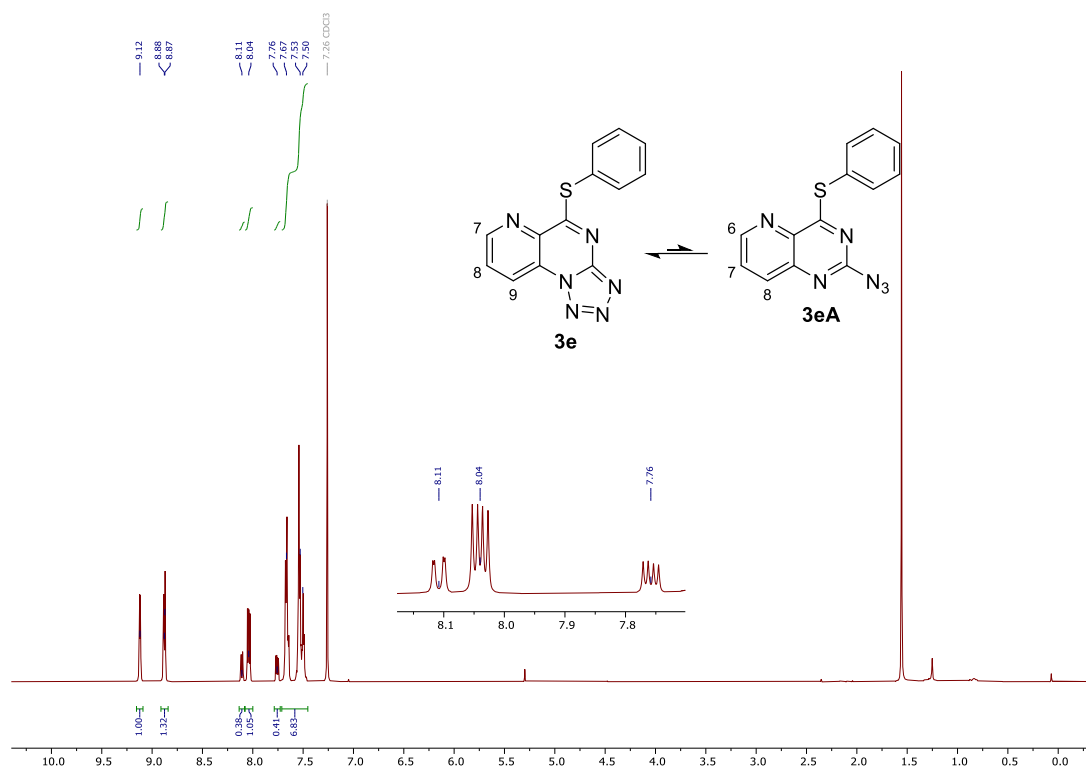

5-(Cyclohexylthio)pyrido[2,3-*e*]tetrazolo[1,5-*a*]pyrimidine (**3f**):

$^1\text{H}$  NMR (500 MHz,  $\text{DMSO-}d_6$ )

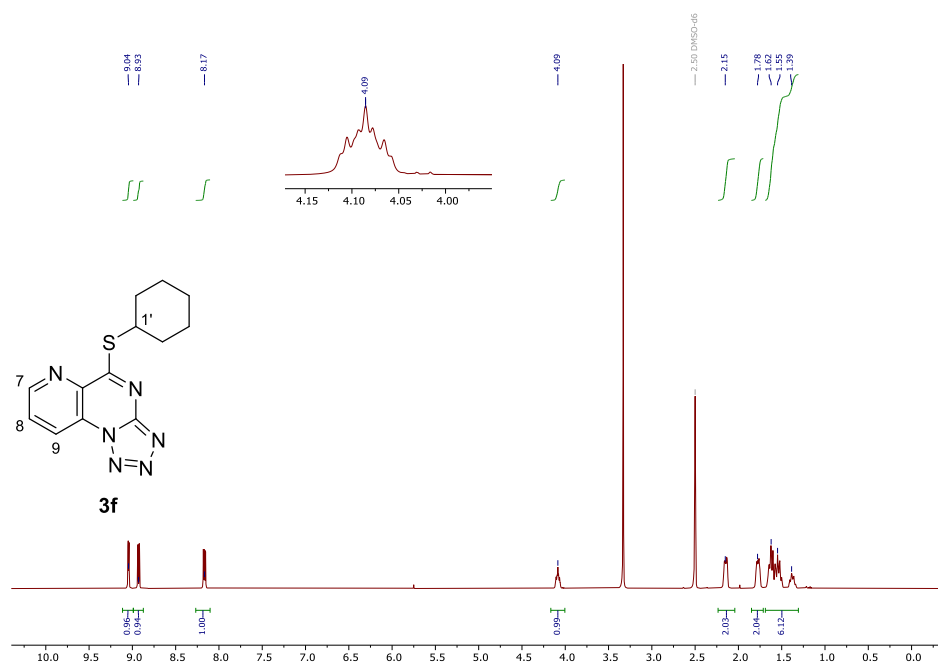

$^{13}\text{C}$  NMR (125 MHz,  $\text{DMSO-}d_6$ )

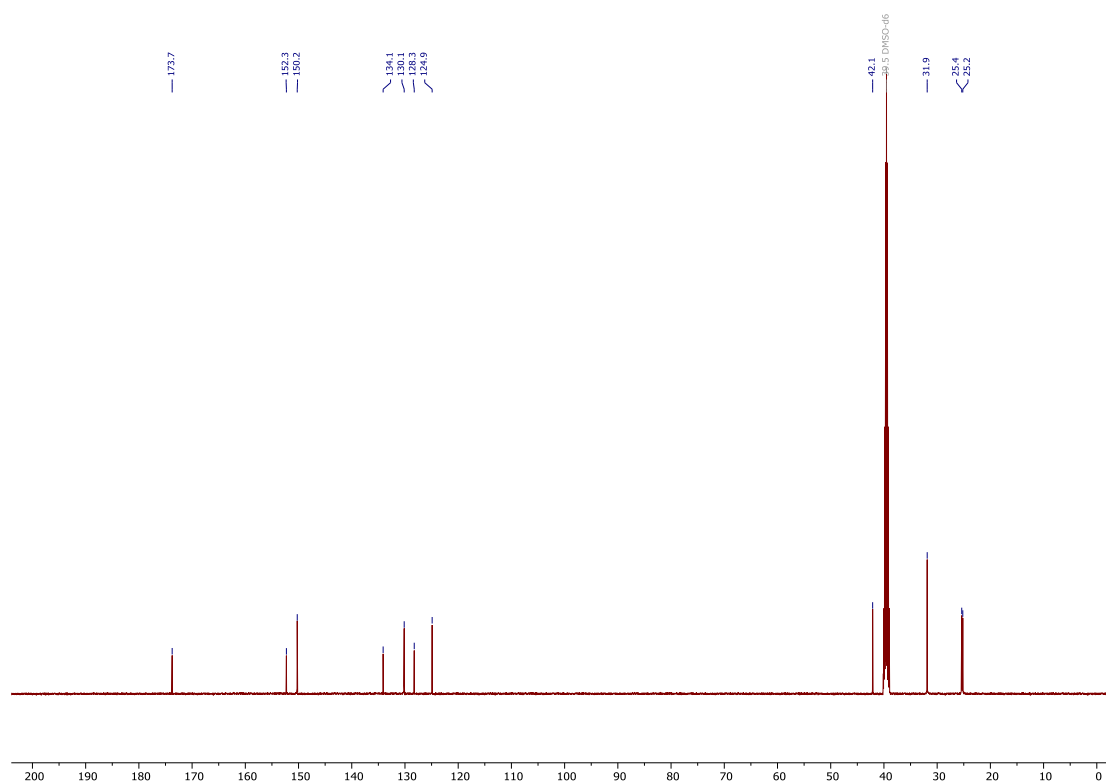

5-(Cyclohexylthio)pyrido[2,3-*e*]tetrazolo[1,5-*a*]pyrimidine (**3f**) and 2-azido-4-(cyclohexylthio)pyrido[3,2-*d*]pyrimidine (**3fA**):

<sup>1</sup>H NMR (500 MHz, CDCl<sub>3</sub>)

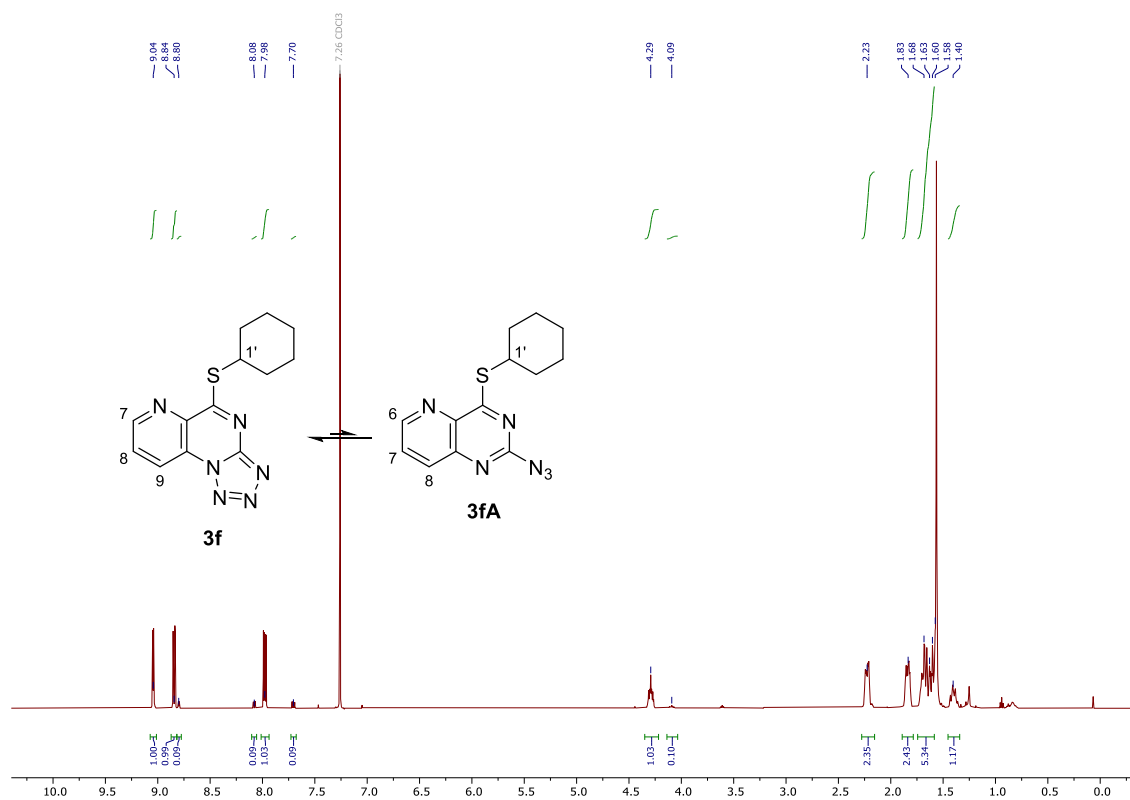

*N*-(4-Methoxybenzyl)pyrido[2,3-*e*]tetrazolo[1,5-*a*]pyrimidin-5-amine (**4a**):

$^1\text{H}$  NMR (500 MHz,  $\text{DMSO-}d_6$ )

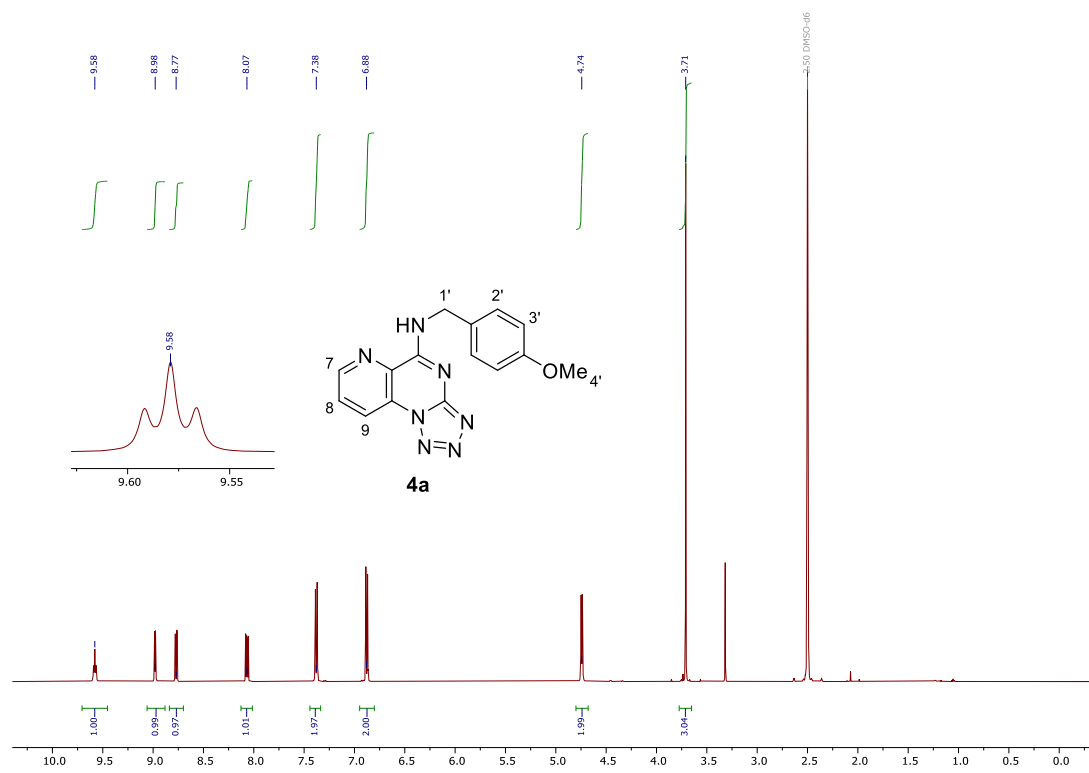

$^{13}\text{C}$  NMR (125 MHz,  $\text{DMSO-}d_6$ )

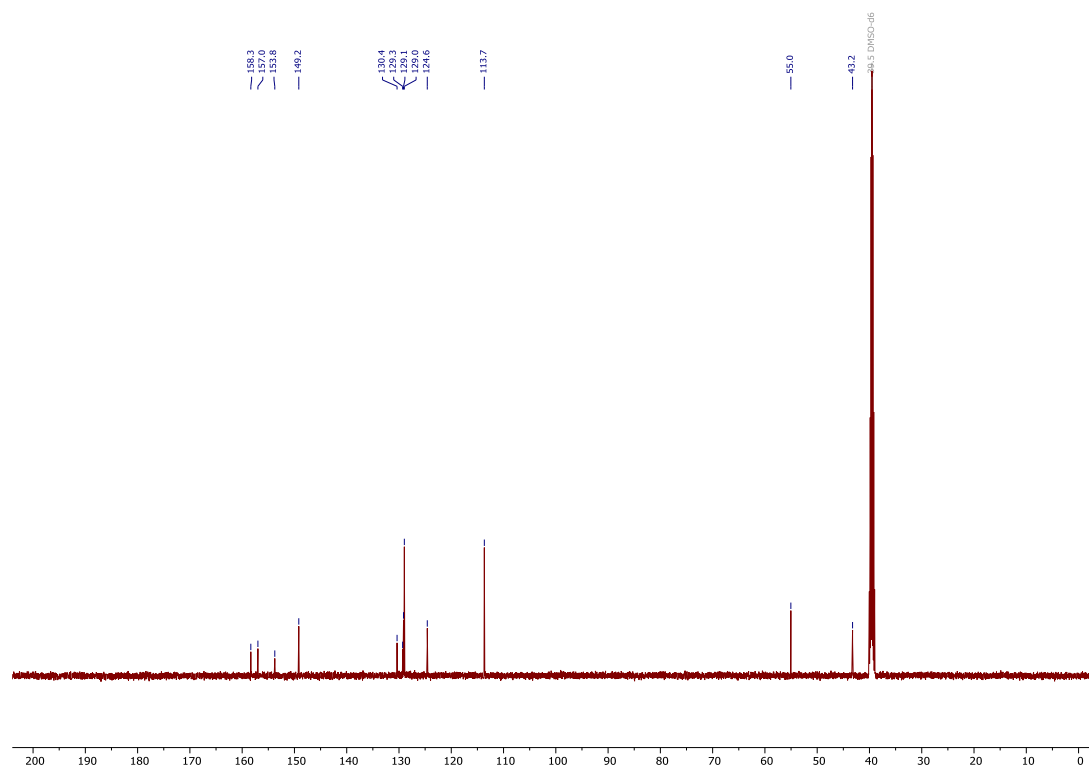

*N*-(4-Methoxybenzyl)pyrido[2,3-*e*]tetrazolo[1,5-*a*]pyrimidin-5-amine (**4a**) and 2-azido-*N*-(4-methoxybenzyl)pyrido[3,2-*d*]pyrimidin-4-amine (**4aA**):

<sup>1</sup>H NMR (500 MHz, CDCl<sub>3</sub>)

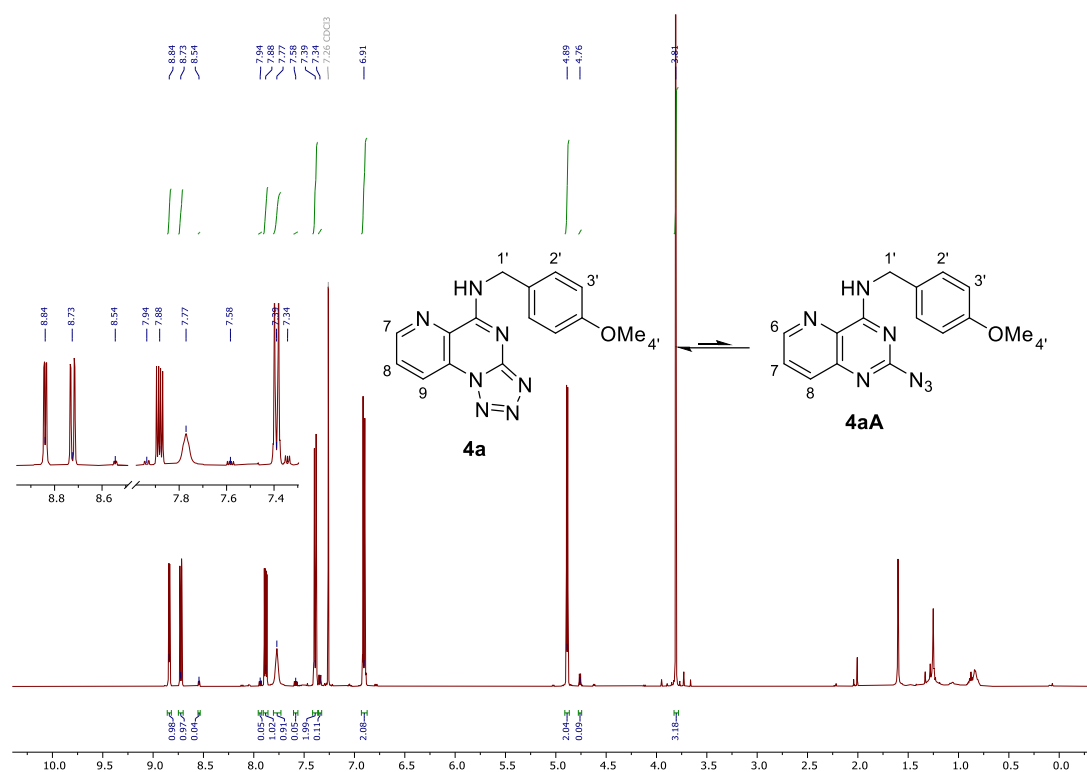

*N*-Hexylpyrido[2,3-*e*]tetrazolo[1,5-*a*]pyrimidin-5-amine (**4b**):

$^1\text{H}$  NMR (500 MHz,  $\text{DMSO}-d_6$ )

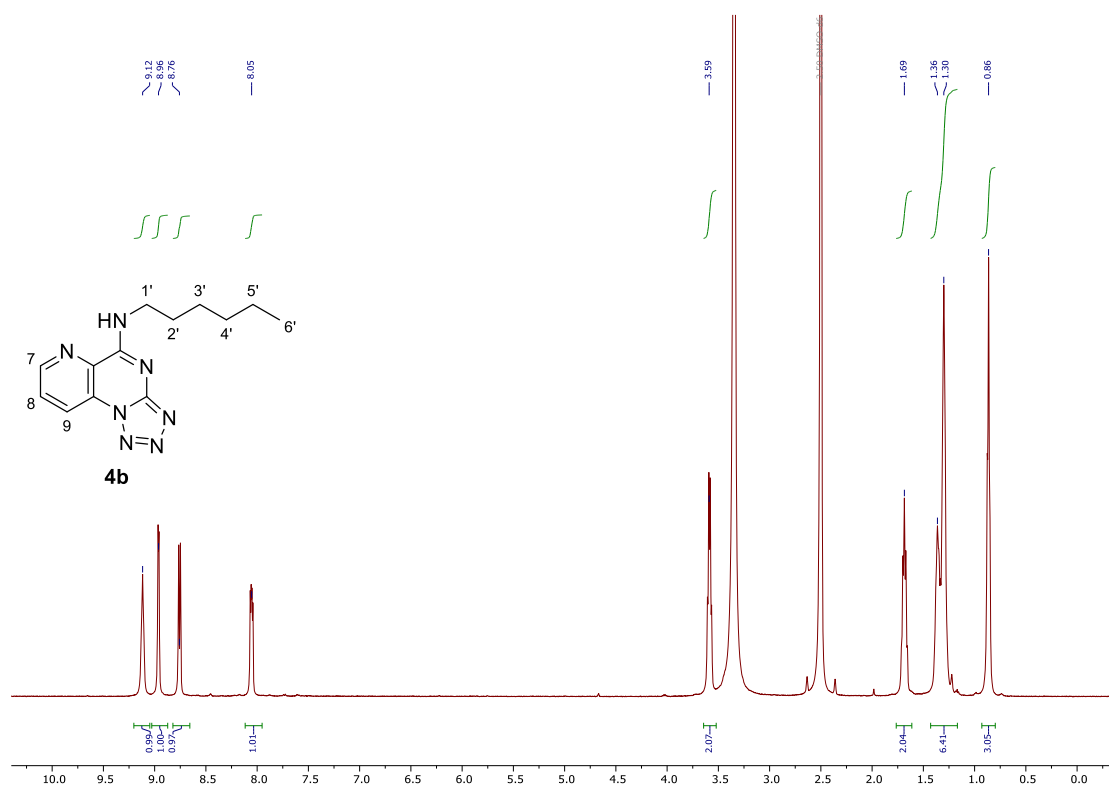

$^{13}\text{C}$  NMR (125 MHz,  $\text{DMSO}-d_6$ )

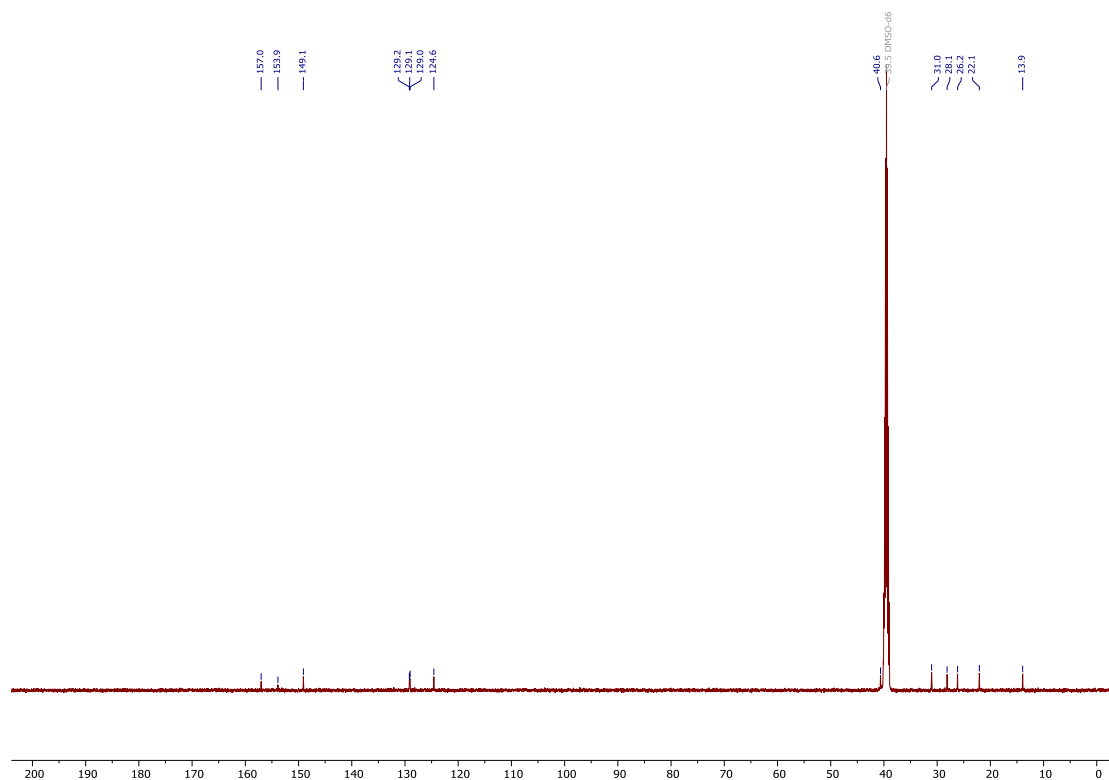

2-Azido-*N*-hexylpyrido[3,2-*d*]pyrimidin-4-amine (**4bA**) and *N*-hexylpyrido[2,3-*e*]tetrazolo[1,5-*a*]pyrimidin-5-amine (**4b**):

$^1\text{H}$  NMR (500 MHz,  $\text{CDCl}_3$ )

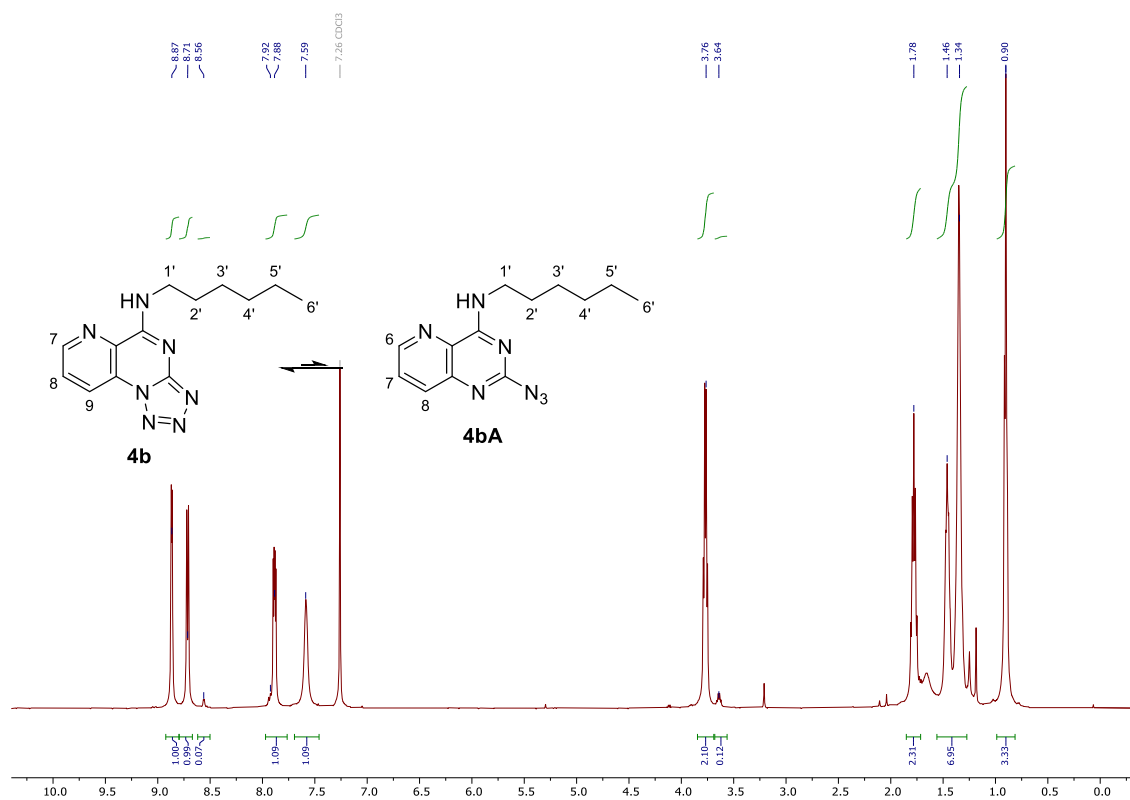



5-(Piperidin-1-yl)pyrido[2,3-*e*]tetrazolo[1,5-*a*]pyrimidine (**4c**):

$^1\text{H}$  NMR (500 MHz,  $\text{DMSO-}d_6$ )

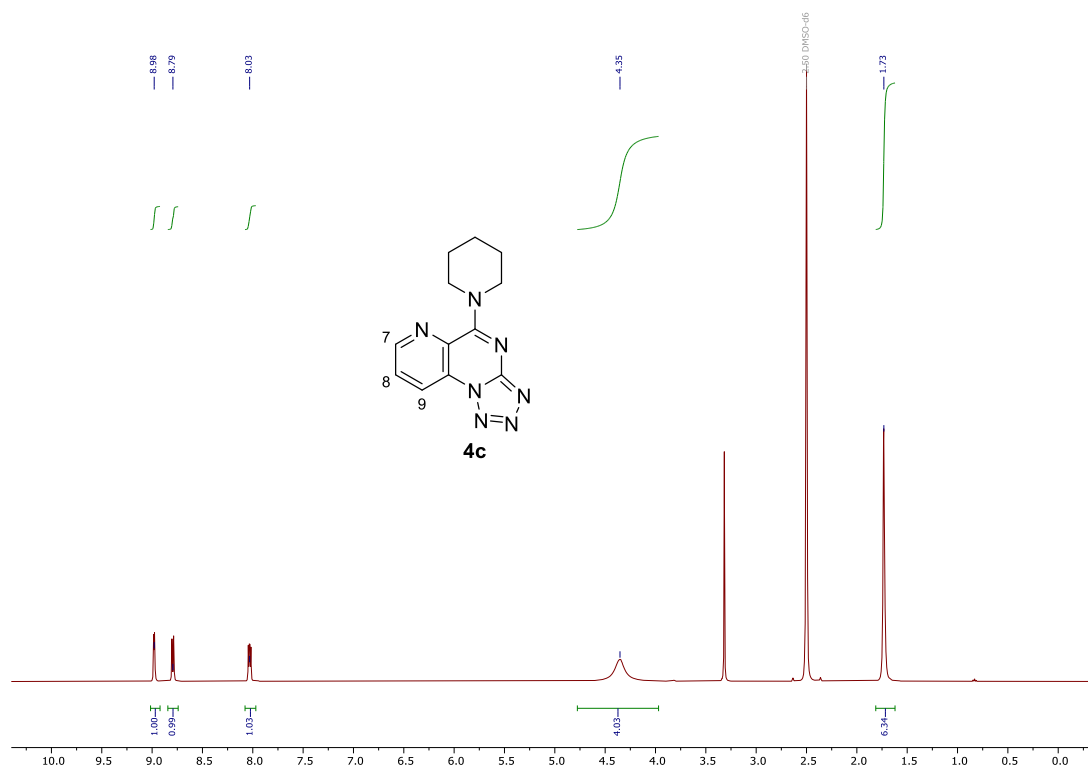

$^{13}\text{C}$  NMR (125 MHz,  $\text{DMSO-}d_6$ )

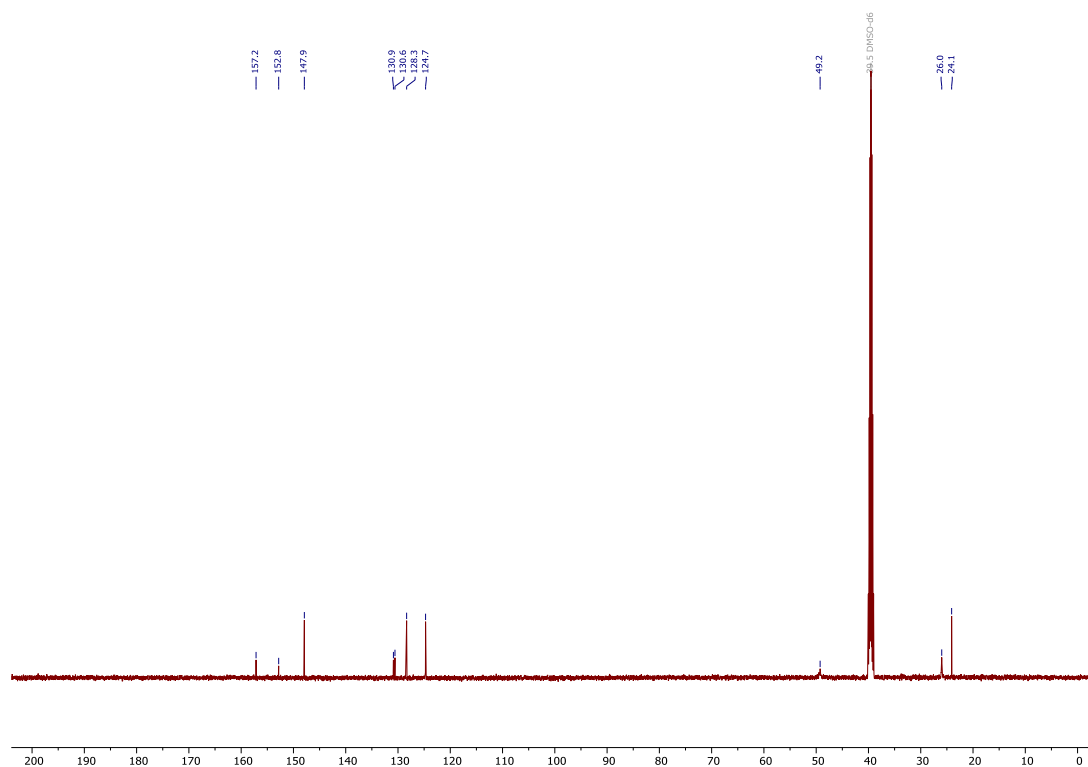

4-(Pyrido[2,3-*e*]tetrazolo[1,5-*a*]pyrimidin-5-yl)morpholine (**4c**) and 2-azido-4-(piperidin-1-yl)pyrido[3,2-*d*]pyrimidine (**4cA**):

$^1\text{H}$  NMR (500 MHz,  $\text{CDCl}_3$ )

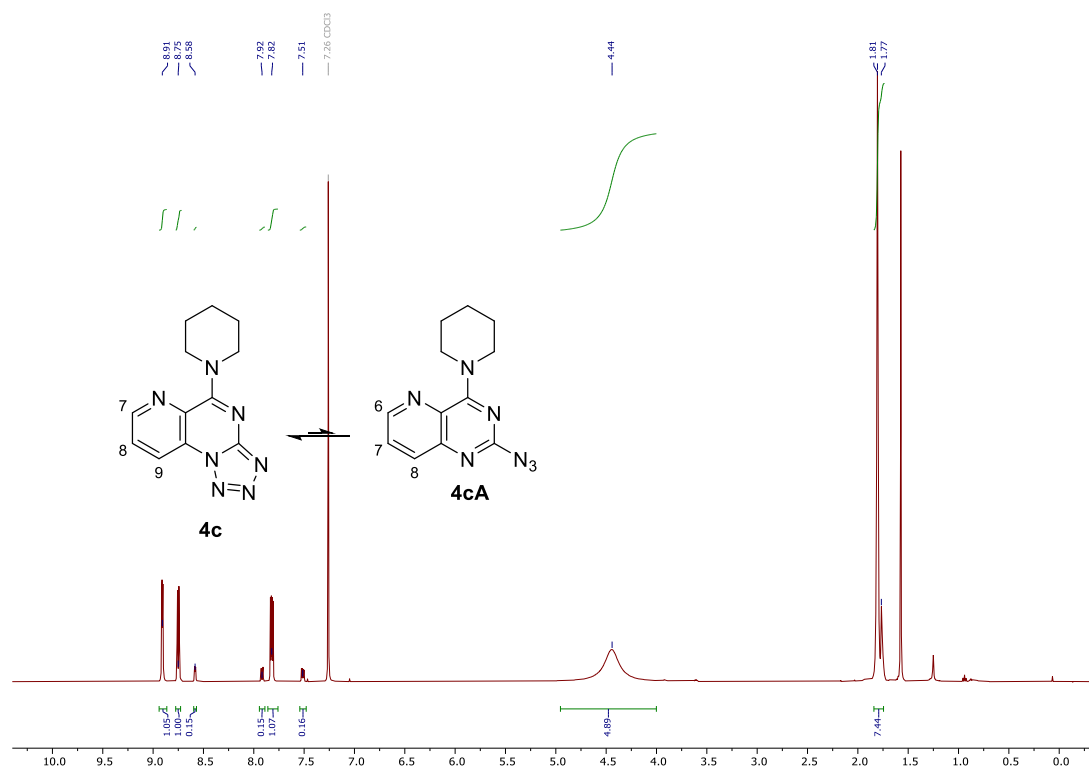

4-(Pyrido[2,3-*e*]tetrazolo[1,5-*a*]pyrimidin-5-yl)morpholine (**4d**):

$^1\text{H}$  NMR (500 MHz,  $\text{DMSO-}d_6$ )

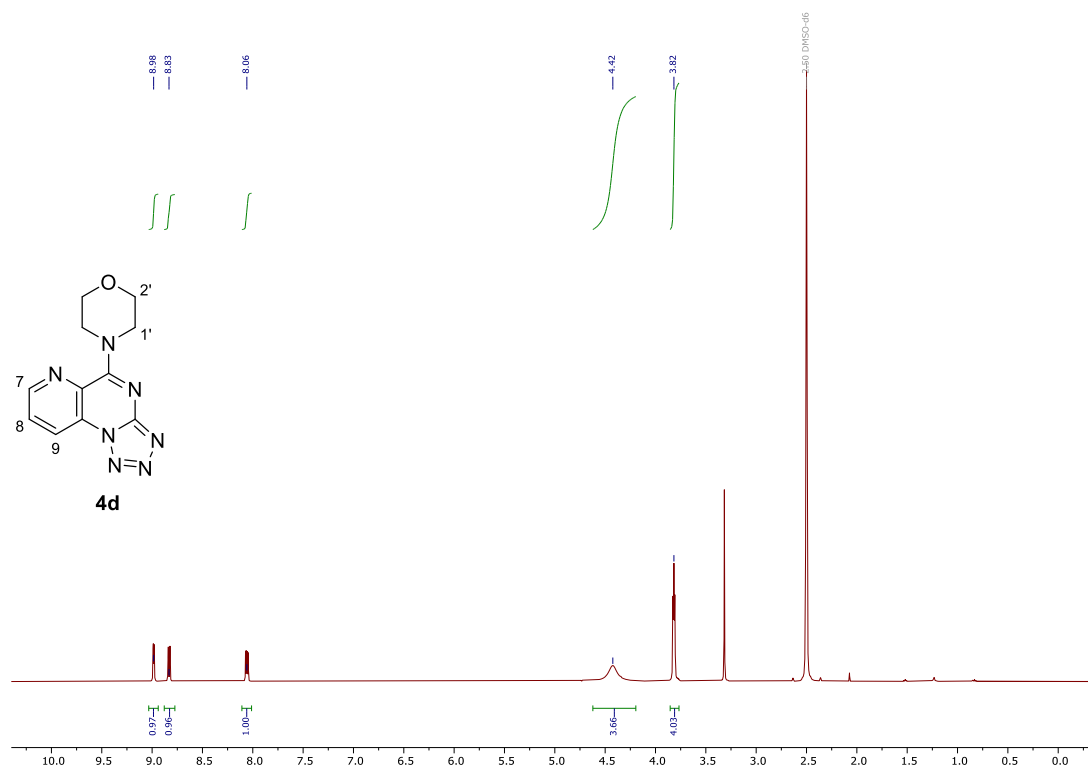

$^{13}\text{C}$  NMR (125 MHz,  $\text{DMSO-}d_6$ )

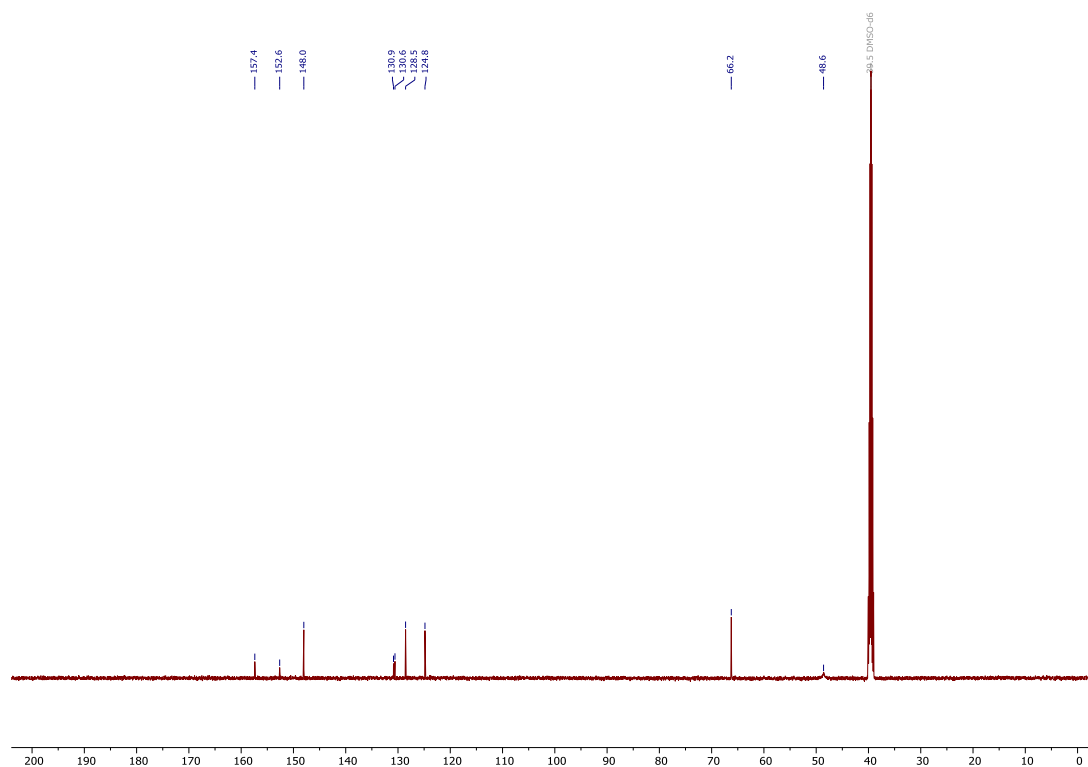

4-(Pyrido[2,3-*e*]tetrazolo[1,5-*a*]pyrimidin-5-yl)morpholine (**4d**) and 4-(2-azidopyrido[3,2-*d*]pyrimidin-4-yl)morpholine (**4dA**):

<sup>1</sup>H NMR (500 MHz, CDCl<sub>3</sub>)

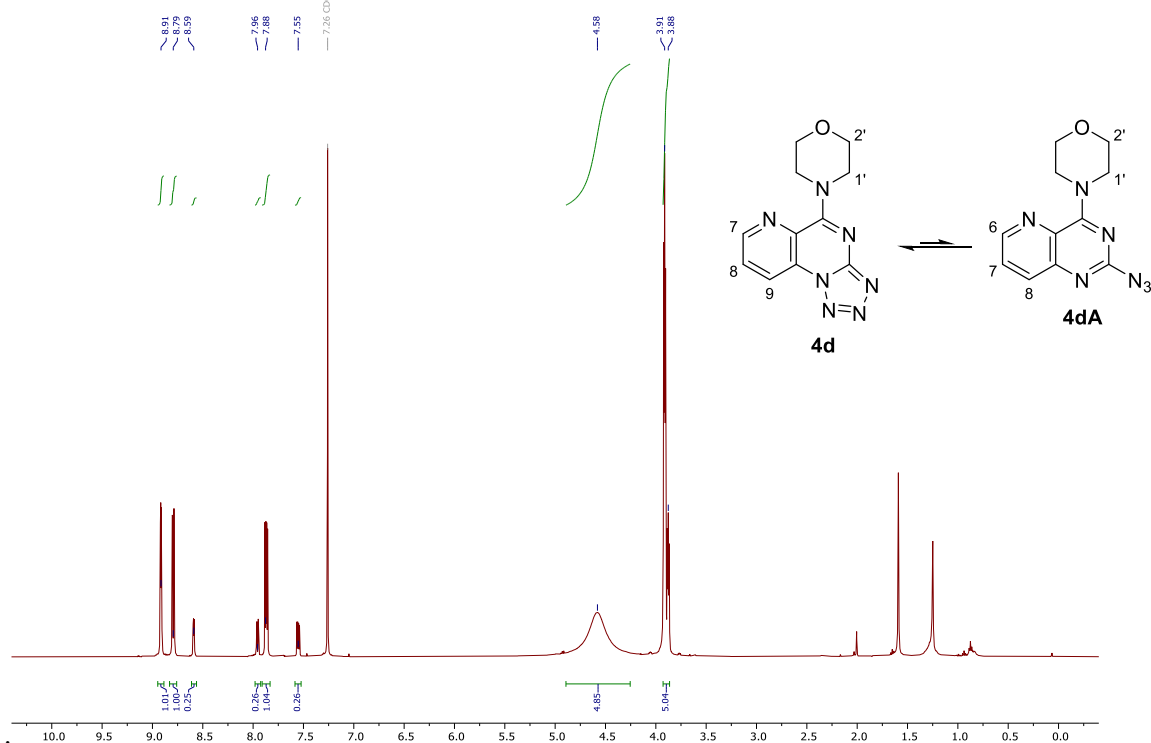

Pyrido[2,3-*e*]tetrazolo[1,5-*a*]pyrimidin-5-amine (**4e**):

$^1\text{H}$  NMR (500 MHz,  $\text{DMSO-}d_6$ )

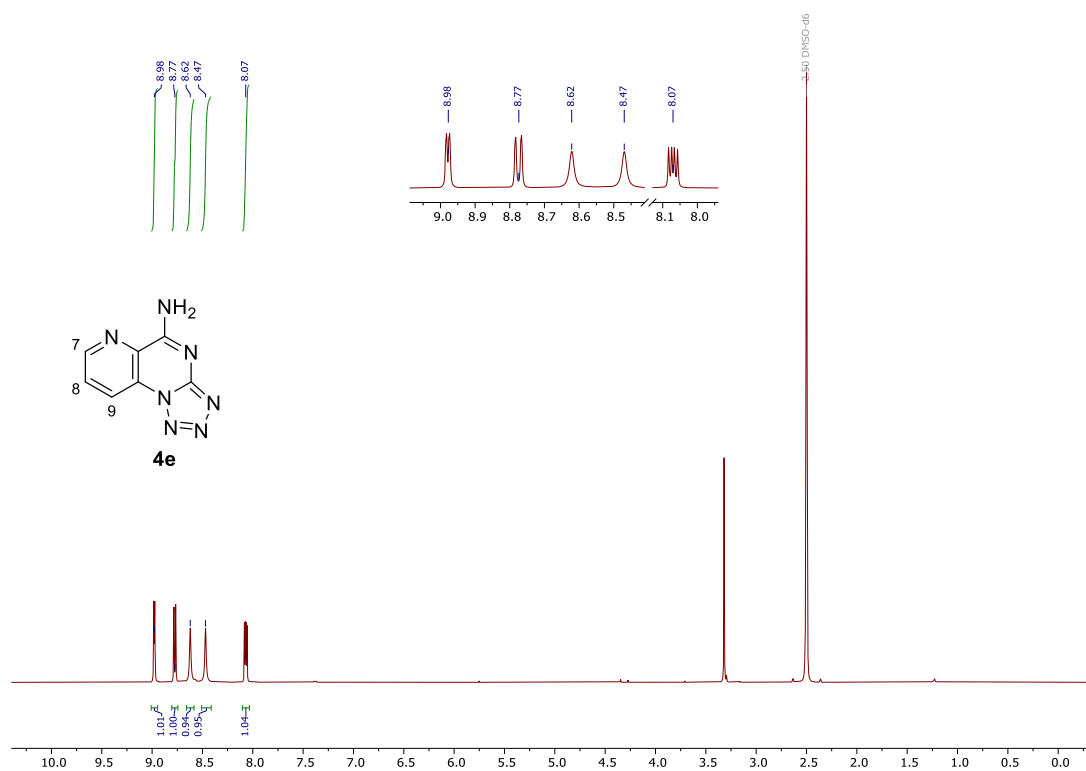

$^{13}\text{C}$  NMR (125 MHz,  $\text{DMSO-}d_6$ )

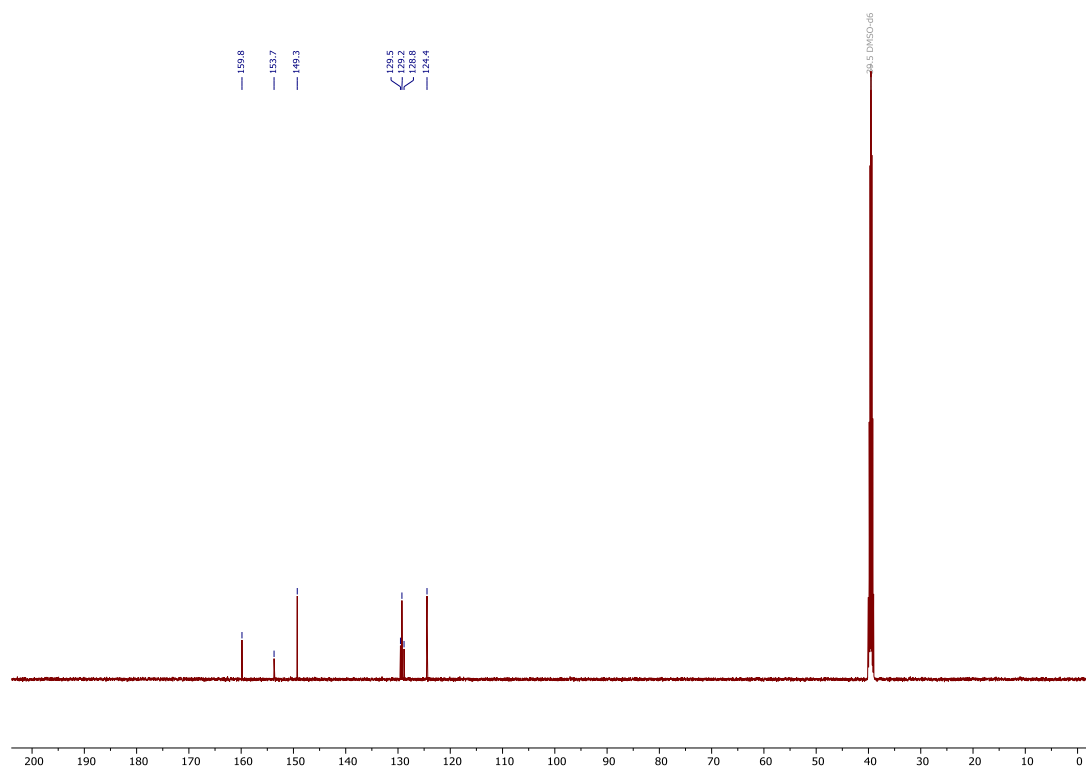

5-Hydrazinylpyrido[2,3-*e*]tetrazolo[1,5-*a*]pyrimidine (**4f**):

$^1\text{H}$  NMR (500 MHz,  $\text{DMSO-}d_6$ )

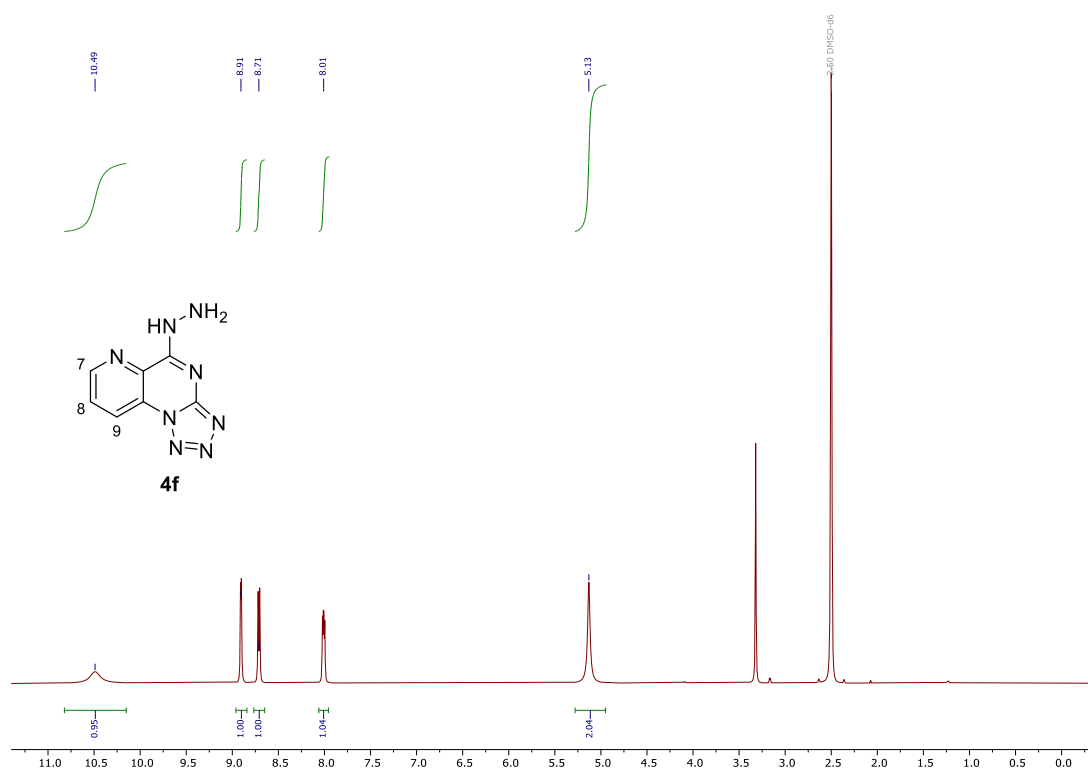

$^{13}\text{C}$  NMR (125 MHz,  $\text{DMSO-}d_6$ )

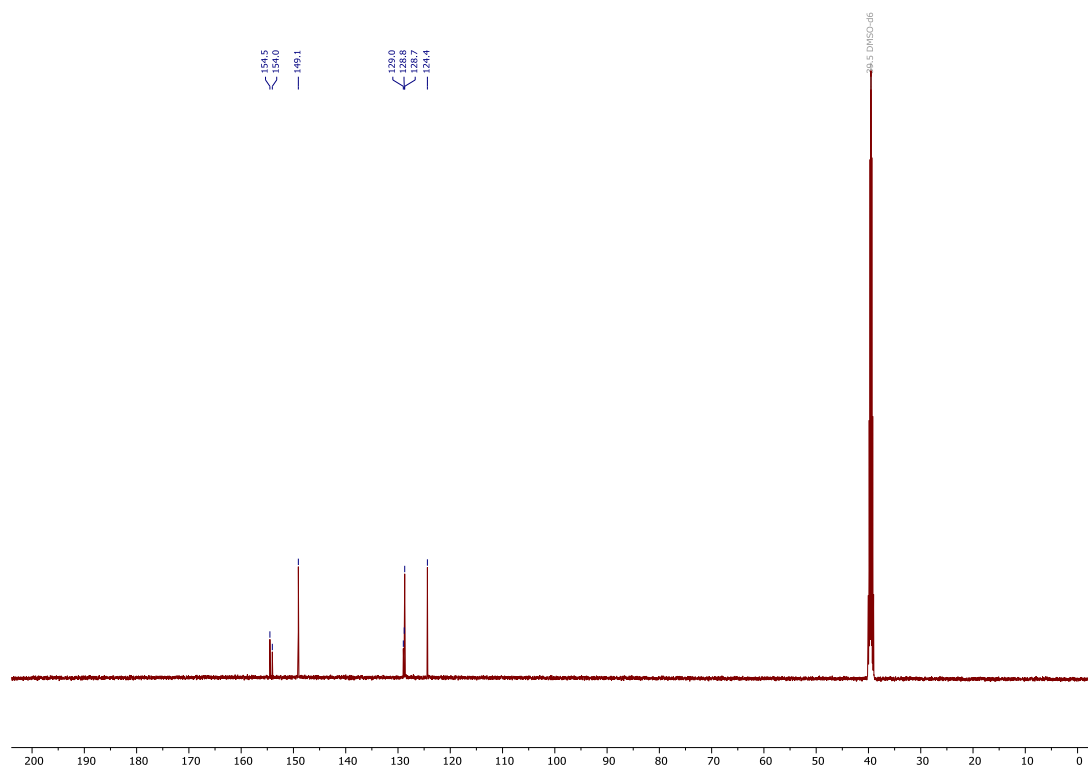

5-(4-Methylpiperazin-1-yl)pyrido[2,3-*e*]tetrazolo[1,5-*a*]pyrimidine (**4g**):

$^1\text{H}$  NMR (500 MHz,  $\text{DMSO-}d_6$ )

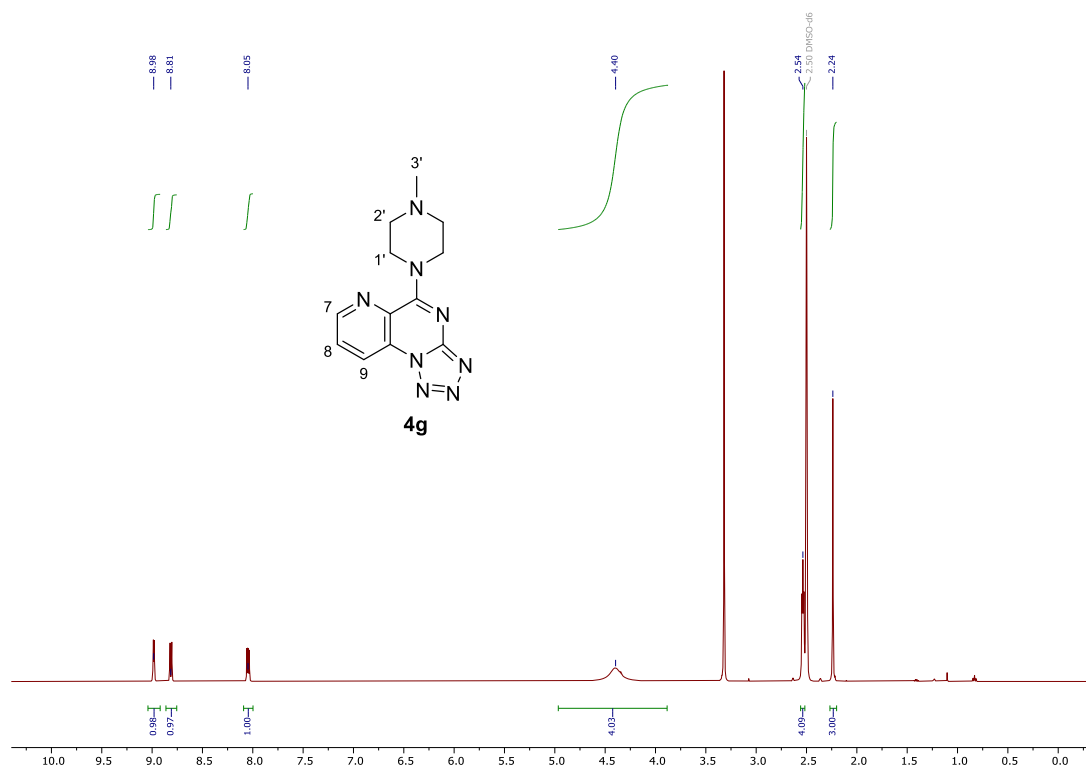

$^{13}\text{C}$  NMR (125 MHz,  $\text{DMSO-}d_6$ )

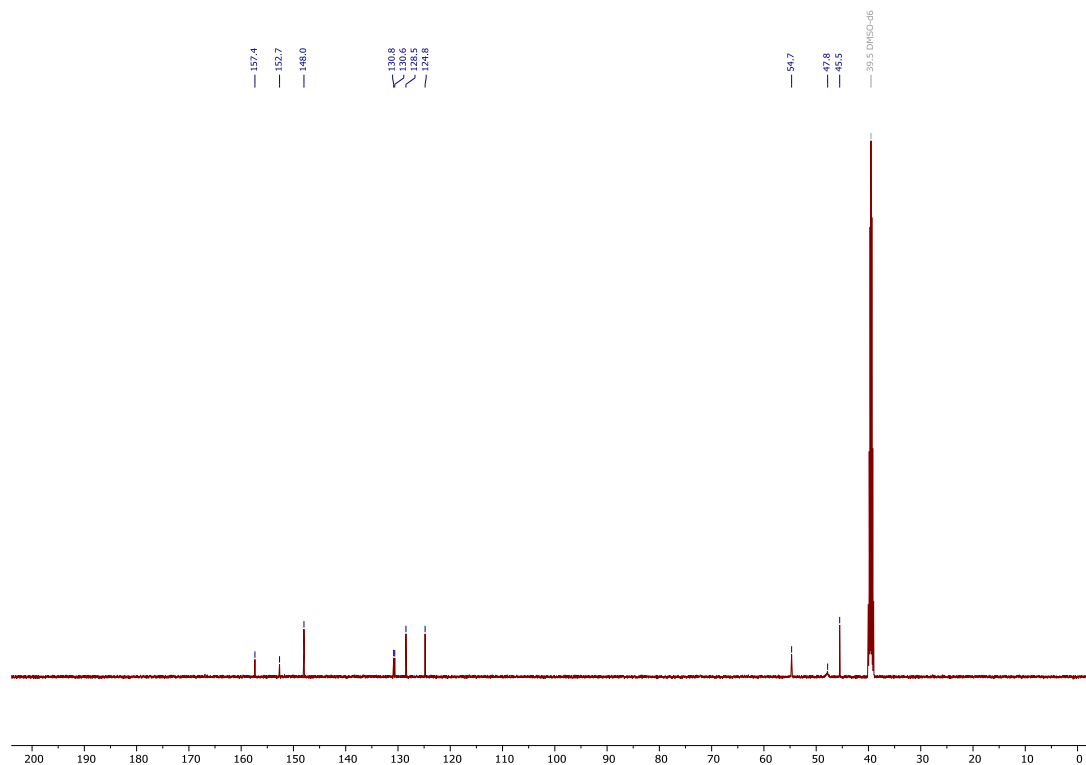

5-(4-Methylpiperazin-1-yl)pyrido[2,3-*e*]tetrazolo[1,5-*a*]pyrimidine (**4g**) and 2-azido-4-(4-methylpiperazin-1-yl)pyrido[3,2-*d*]pyrimidine (**4gA**):

<sup>1</sup>H NMR (500 MHz, CDCl<sub>3</sub>)

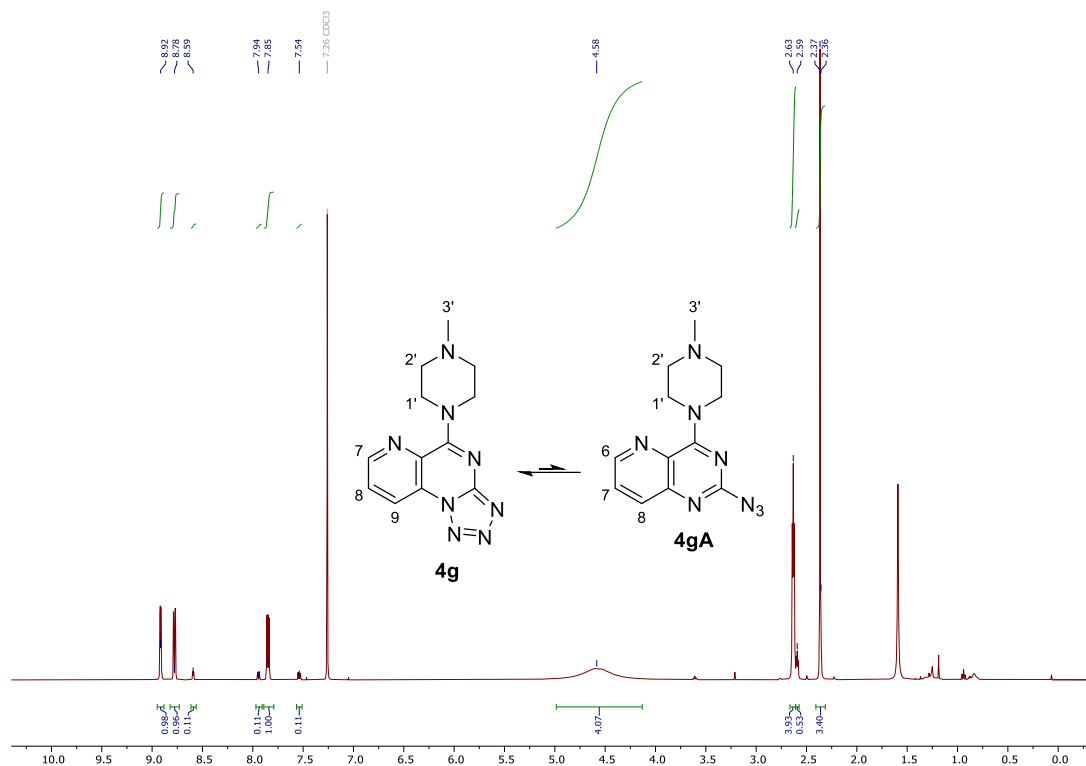



5-(Cyclopentyloxy)pyrido[2,3-*e*]tetrazolo[1,5-*a*]pyrimidine (**5a**):

$^1\text{H}$  NMR (500 MHz,  $\text{DMSO}-d_6$ )

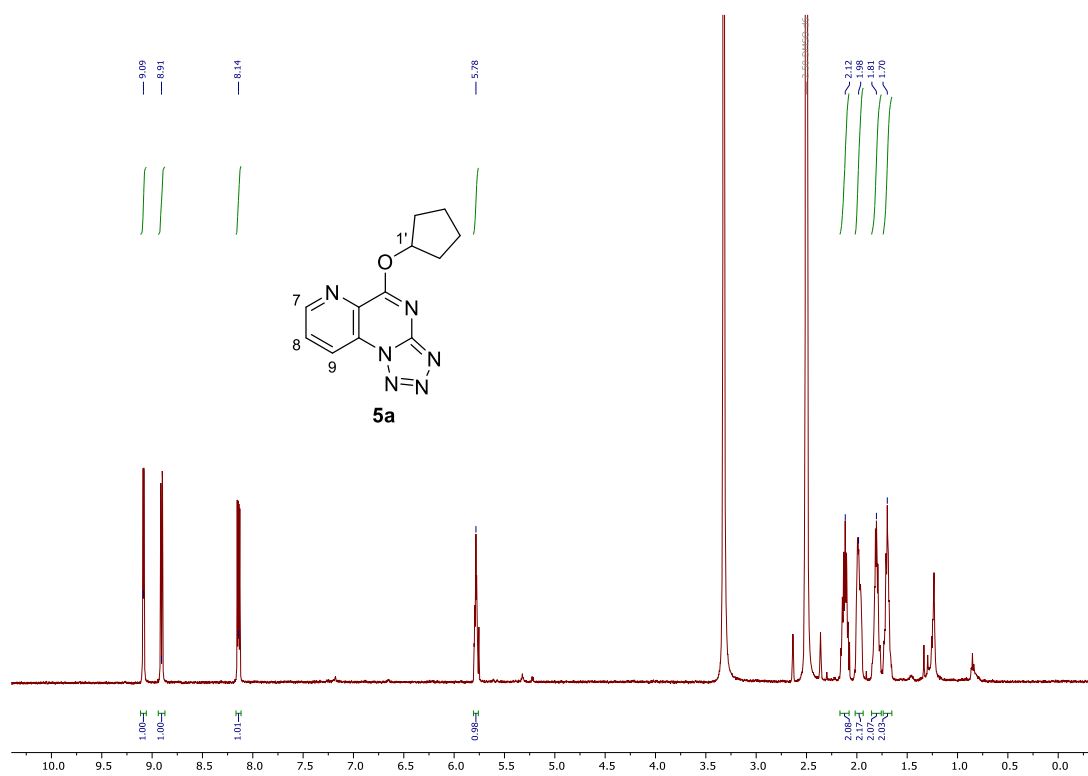

$^{13}\text{C}$  NMR (125 MHz,  $\text{DMSO}-d_6$ )

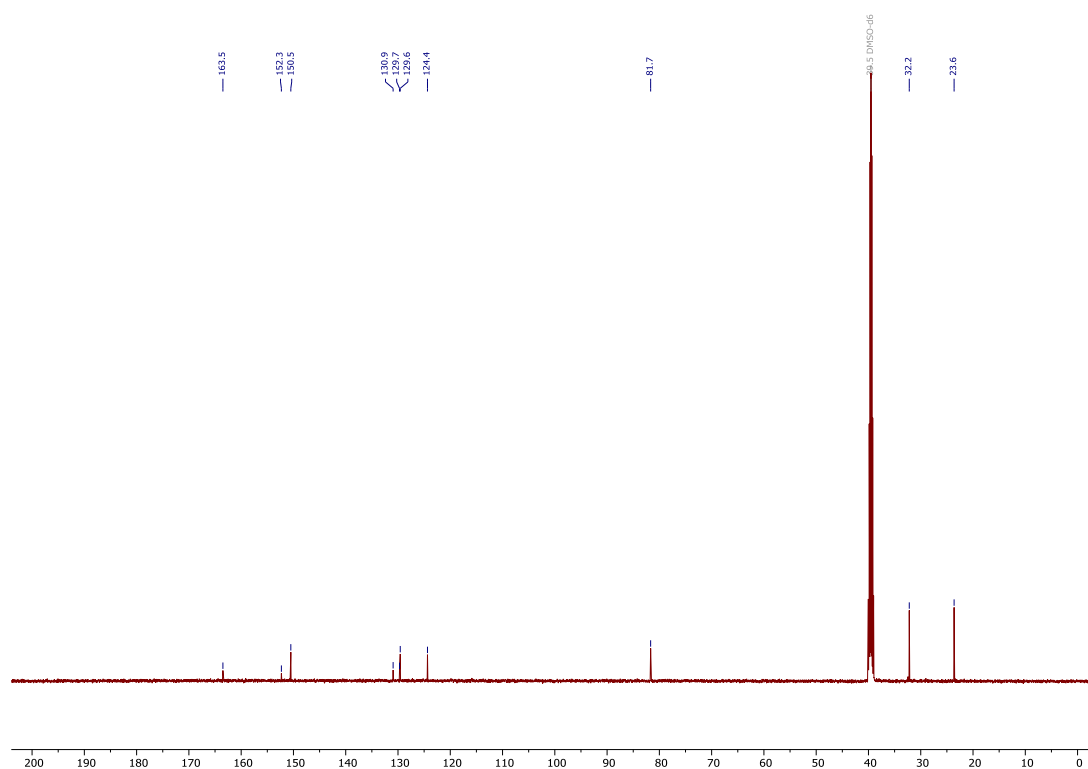

5-(Cyclopentyloxy)pyrido[2,3-*e*]tetrazolo[1,5-*a*]pyrimidine (**5a**) and 2-azido-4-(cyclopentyloxy)pyrido[3,2-*d*]pyrimidine (**5aA**):

$^1\text{H}$  NMR (500 MHz,  $\text{CDCl}_3$ )

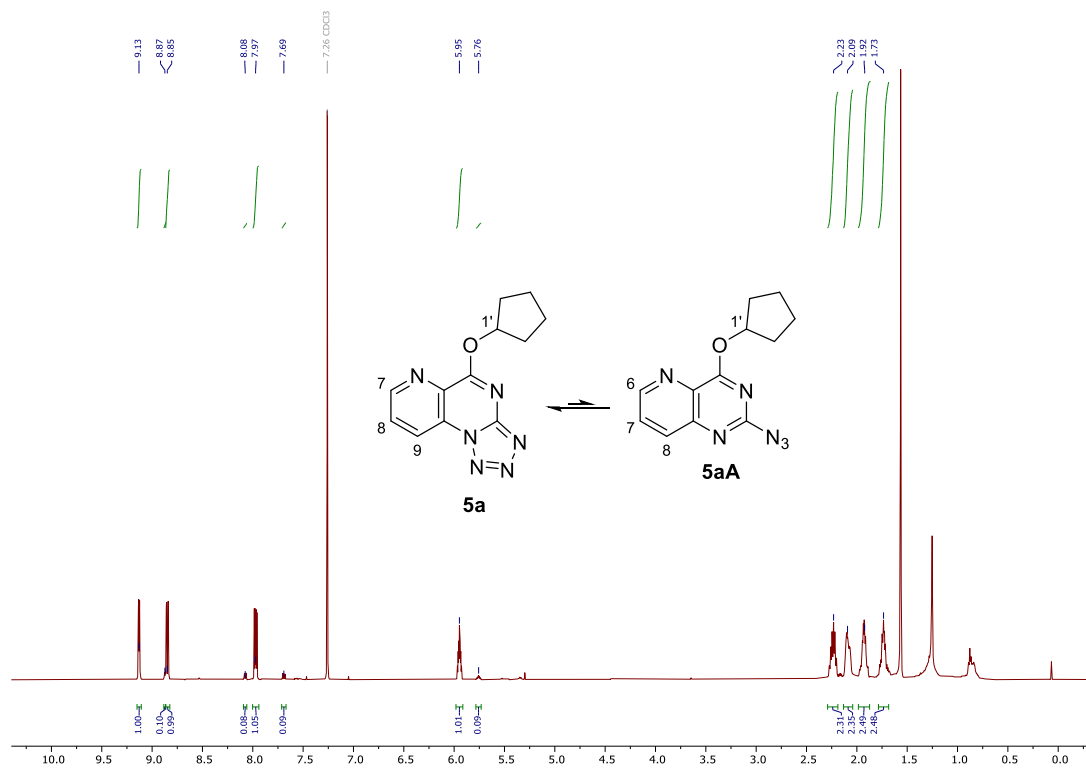

5-Propoxyprido[2,3-*e*]tetrazolo[1,5-*a*]pyrimidine (**5b**):

$^1\text{H}$  NMR (500 MHz,  $\text{DMSO-}d_6$ )

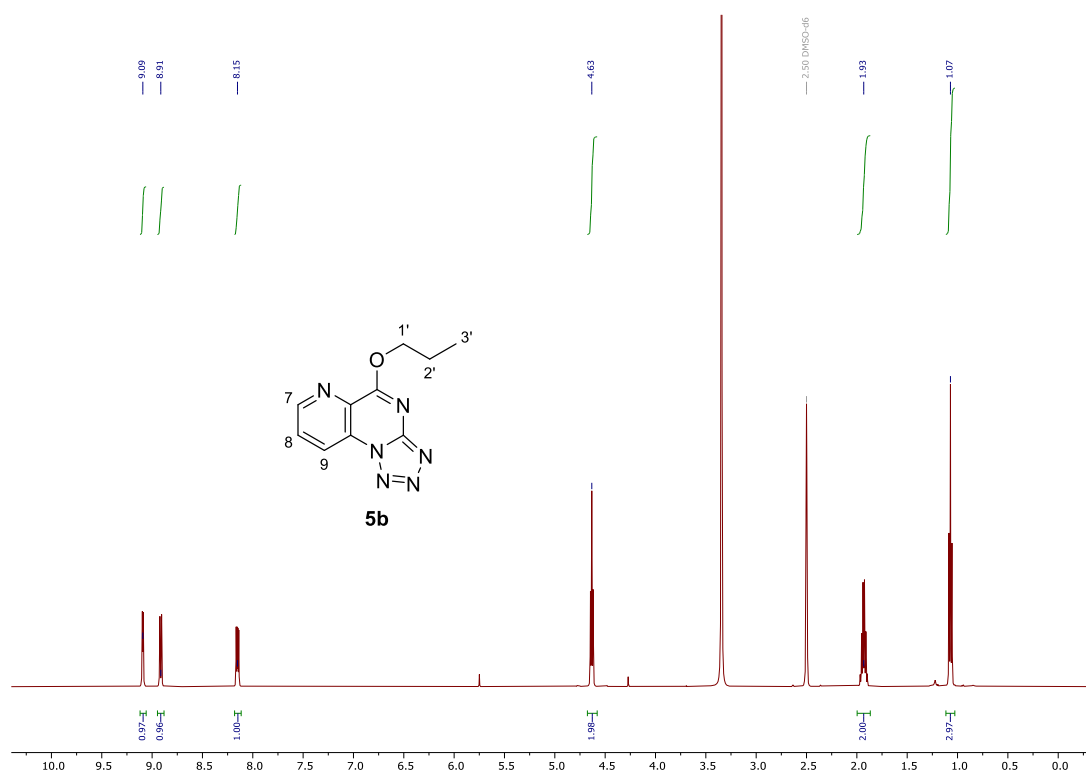

$^{13}\text{C}$  NMR (125 MHz,  $\text{DMSO-}d_6$ )

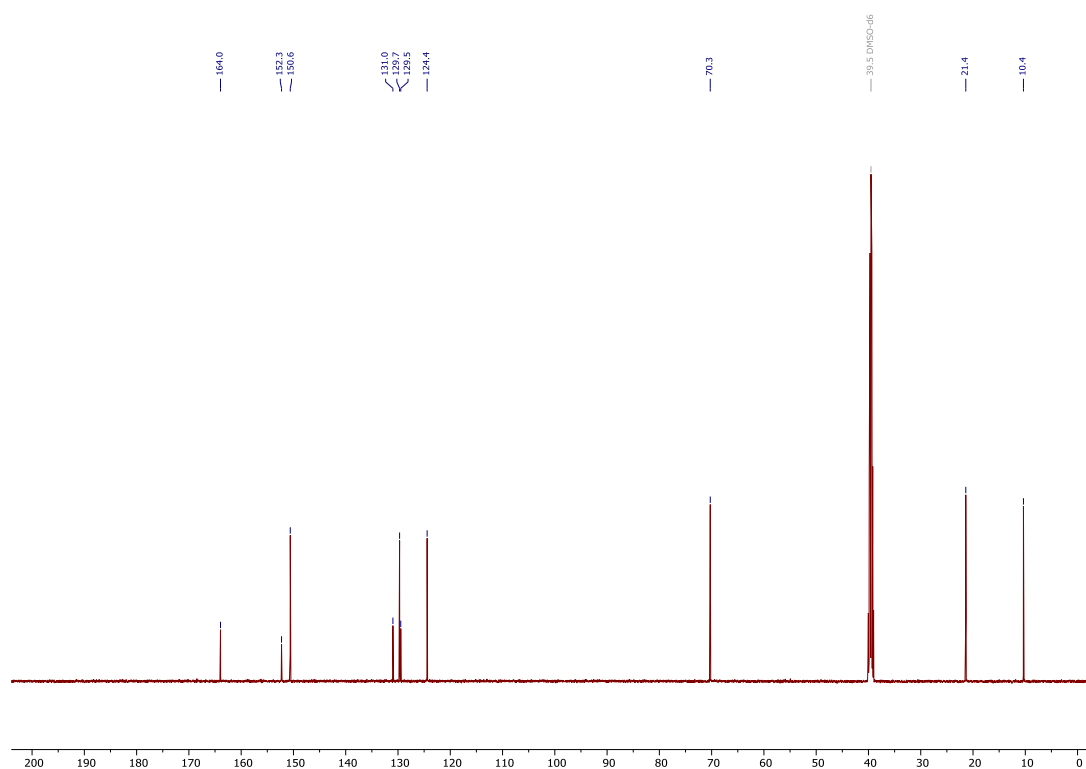

5-Propoxy-pyrido[2,3-*e*]tetrazolo[1,5-*a*]pyrimidine (**5b**) and 2-azido-4-propoxy-pyrido[3,2-*d*]pyrimidine (**5bA**):

$^1\text{H}$  NMR (500 MHz,  $\text{CDCl}_3$ )

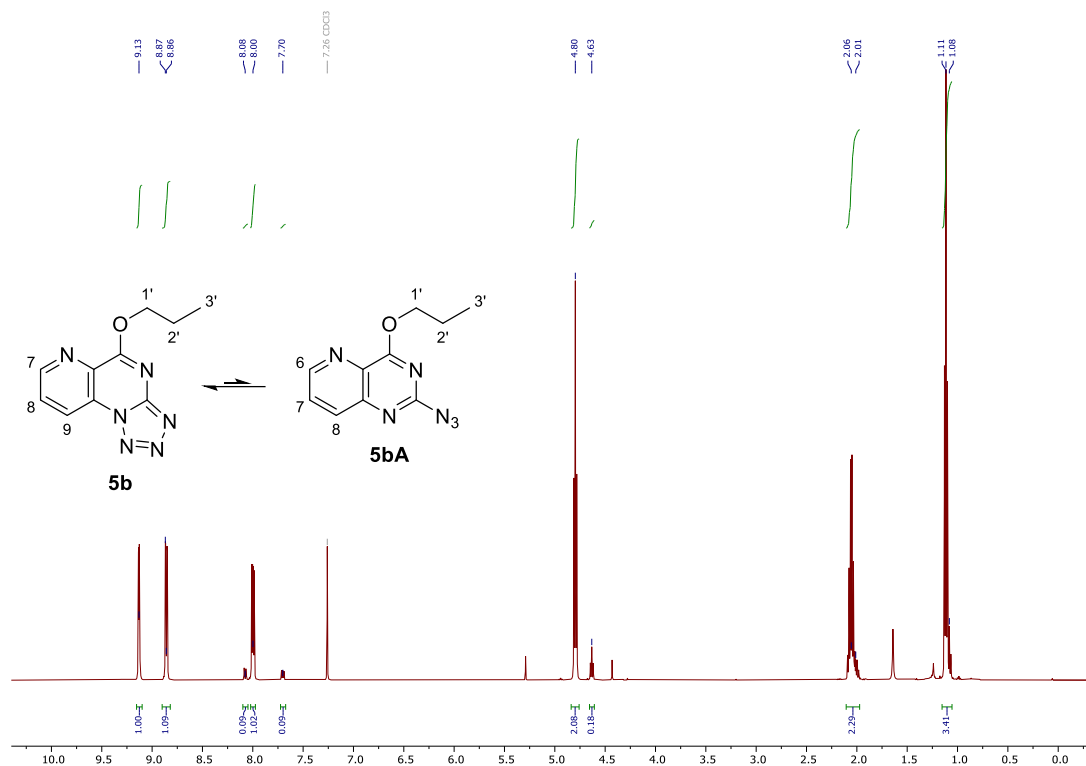

*N*-(4-Methoxybenzyl)-2-(4-phenyl-1*H*-1,2,3-triazol-1-yl)pyrido[3,2-*d*]pyrimidin-4-amine (**6a**):

<sup>1</sup>H NMR (500 MHz, DMSO-*d*<sub>6</sub>)

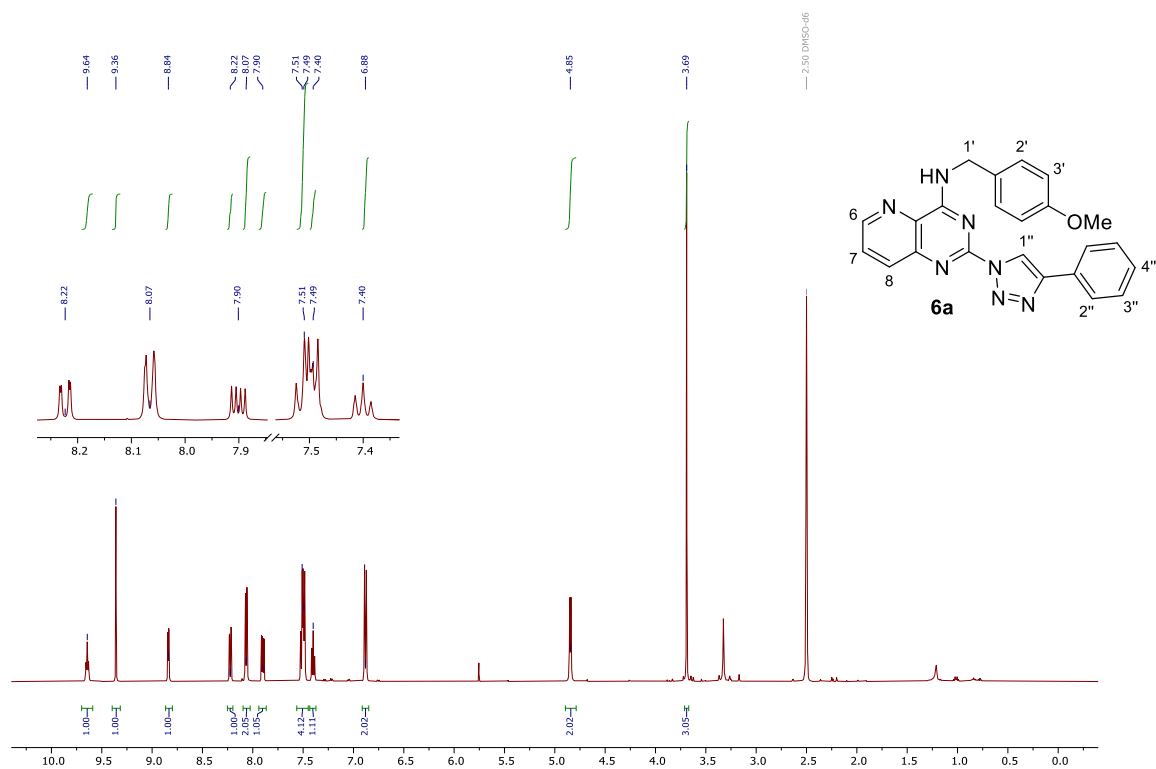

<sup>13</sup>C NMR (125 MHz, DMSO-*d*<sub>6</sub>)

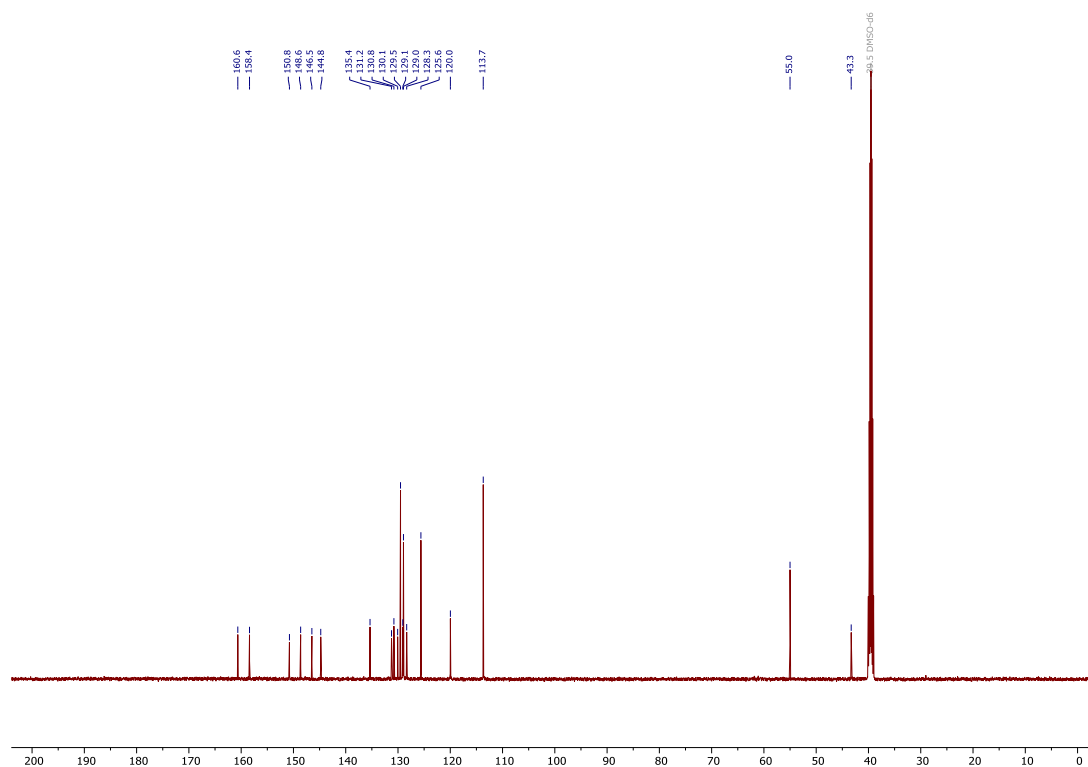

*N*-(4-Methoxybenzyl)-2-(4-phenyl-1*H*-1,2,3-triazol-1-yl)pyrido[3,2-*d*]pyrimidin-4-amine (**6a**):

<sup>1</sup>H NMR (500 MHz, CDCl<sub>3</sub>)

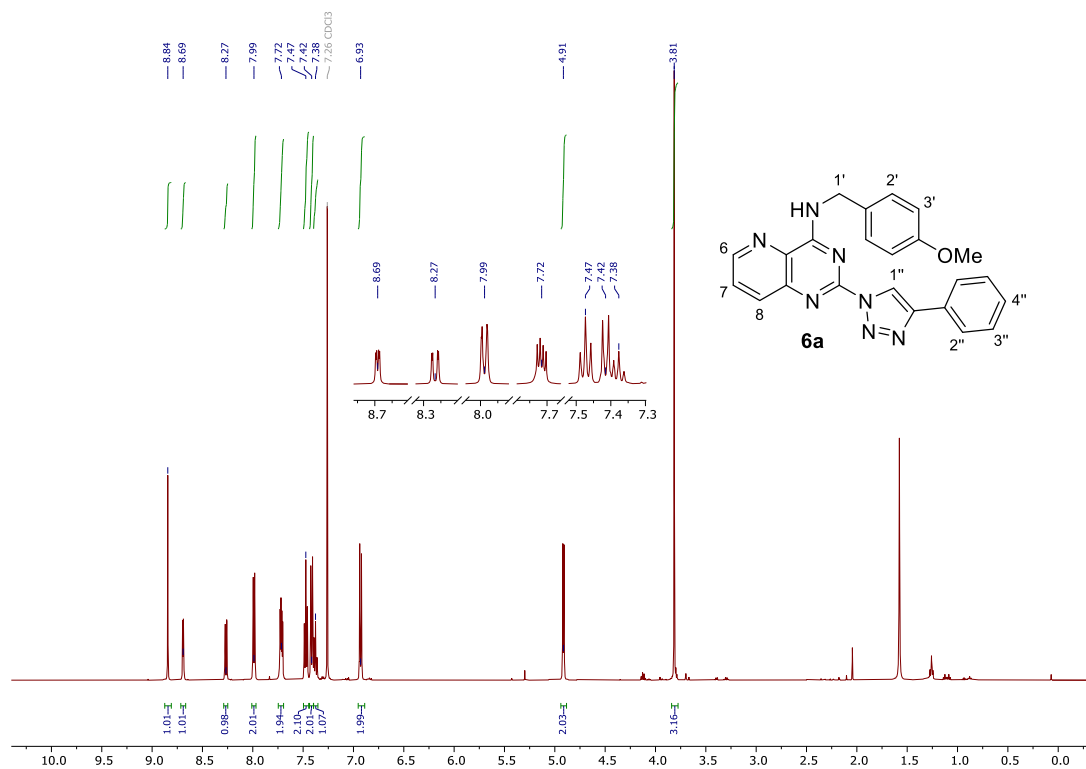

<sup>13</sup>C NMR (125 MHz, CDCl<sub>3</sub>)

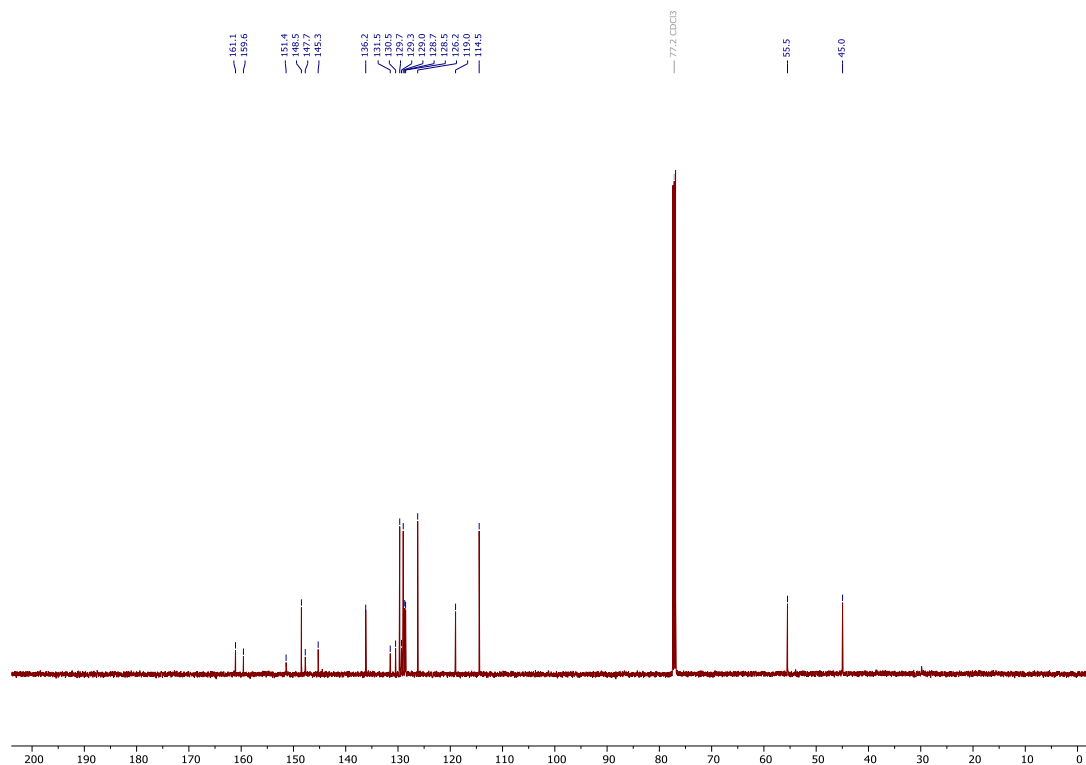

*N*-(4-Methoxybenzyl)-2-(4-(*p*-tolyl)-1*H*-1,2,3-triazol-1-yl)pyrido[3,2-*d*]pyrimidin-4-amine (**6b**):

<sup>1</sup>H NMR (500 MHz, DMSO-*d*<sub>6</sub>)

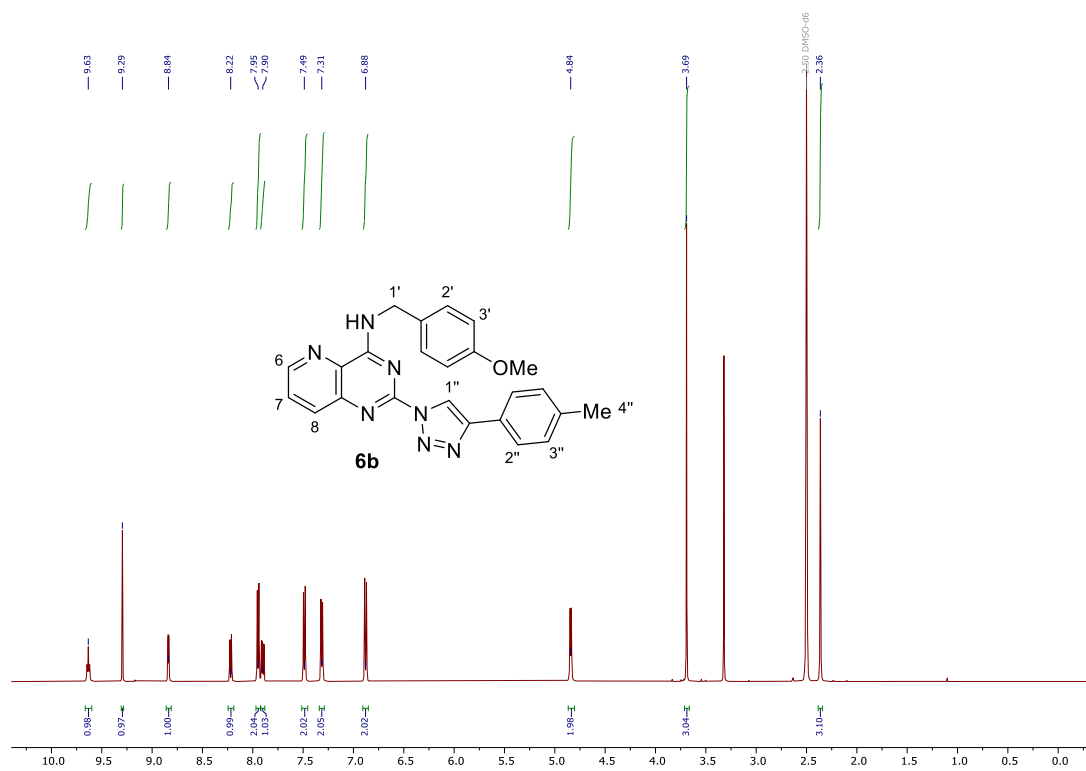

<sup>13</sup>C NMR (125 MHz, DMSO-*d*<sub>6</sub>)

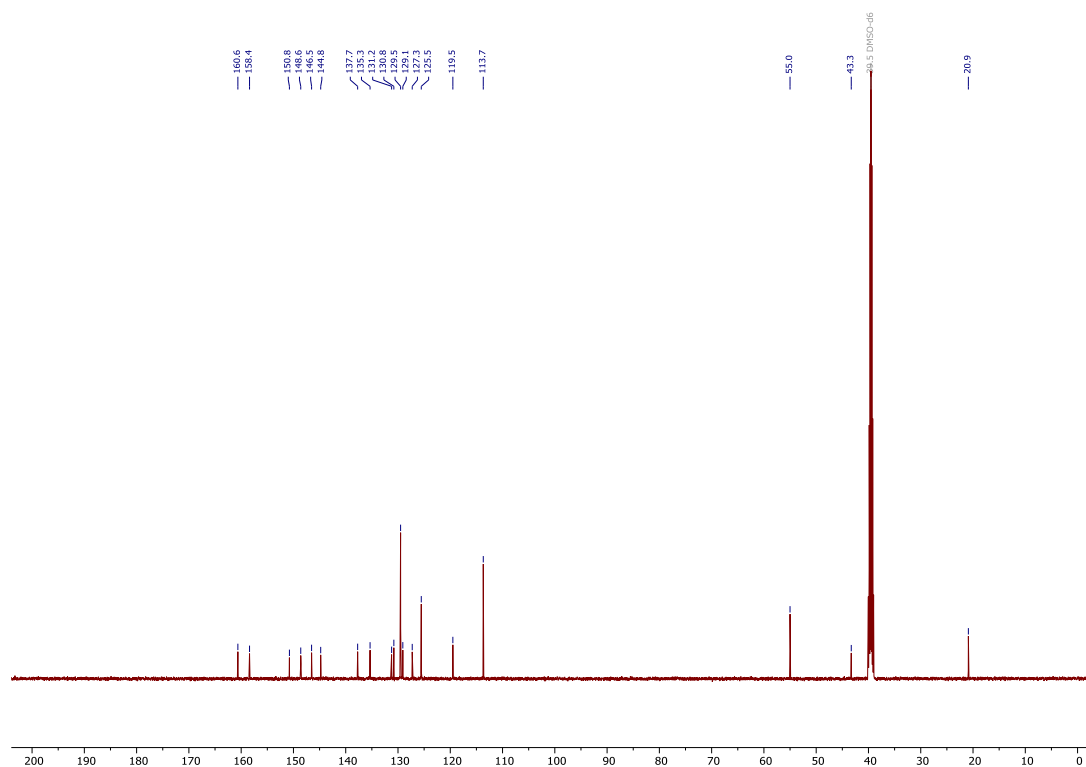

*N*-(4-Methoxybenzyl)-2-(4-(*p*-tolyl)-1*H*-1,2,3-triazol-1-yl)pyrido[3,2-*d*]pyrimidin-4-amine (**6b**):

<sup>1</sup>H NMR (500 MHz, CDCl<sub>3</sub>)

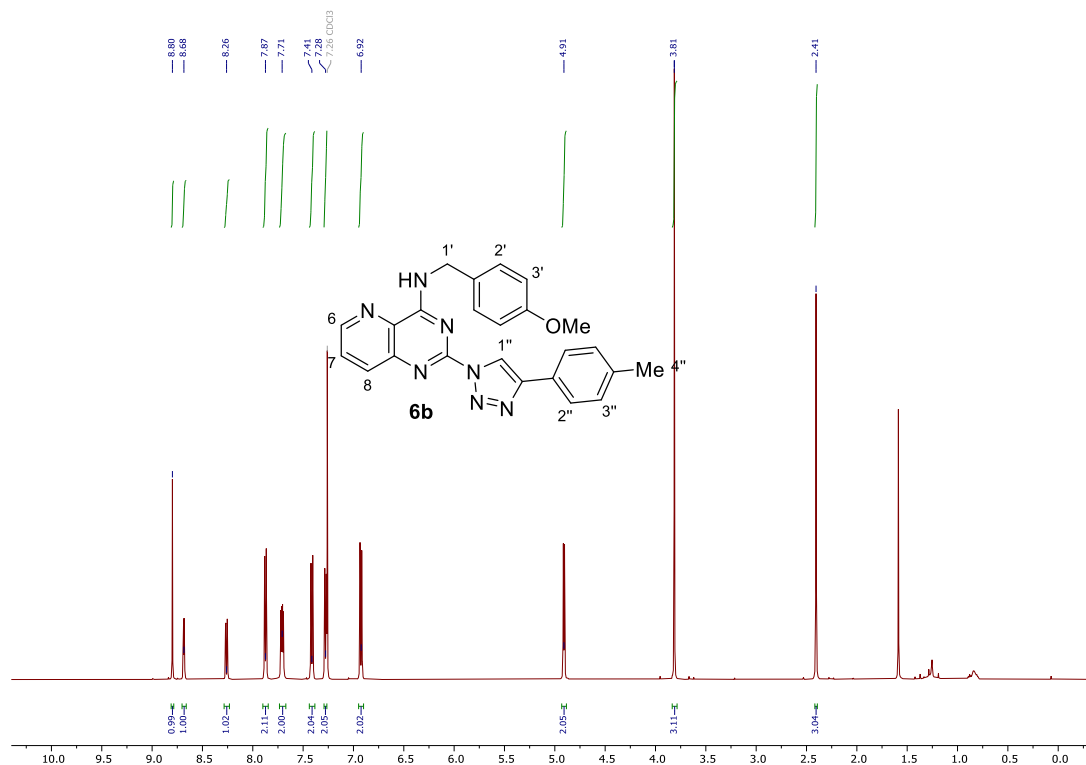

<sup>13</sup>C NMR (125 MHz, CDCl<sub>3</sub>)

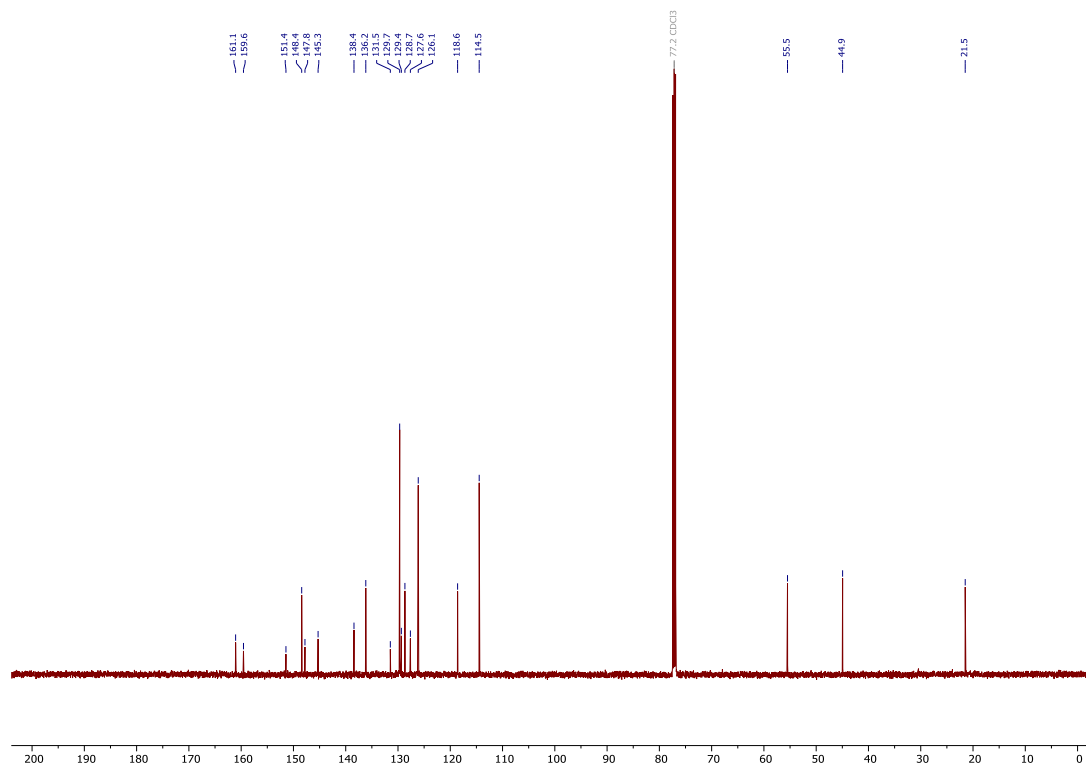



4-(1-(4-((4-Methoxybenzyl)amino)pyrido[3,2-*d*]pyrimidin-2-yl)-1*H*-1,2,3-triazol-4-yl)benzonitrile (**6c**):

<sup>1</sup>H NMR (500 MHz, DMSO-*d*<sub>6</sub>)

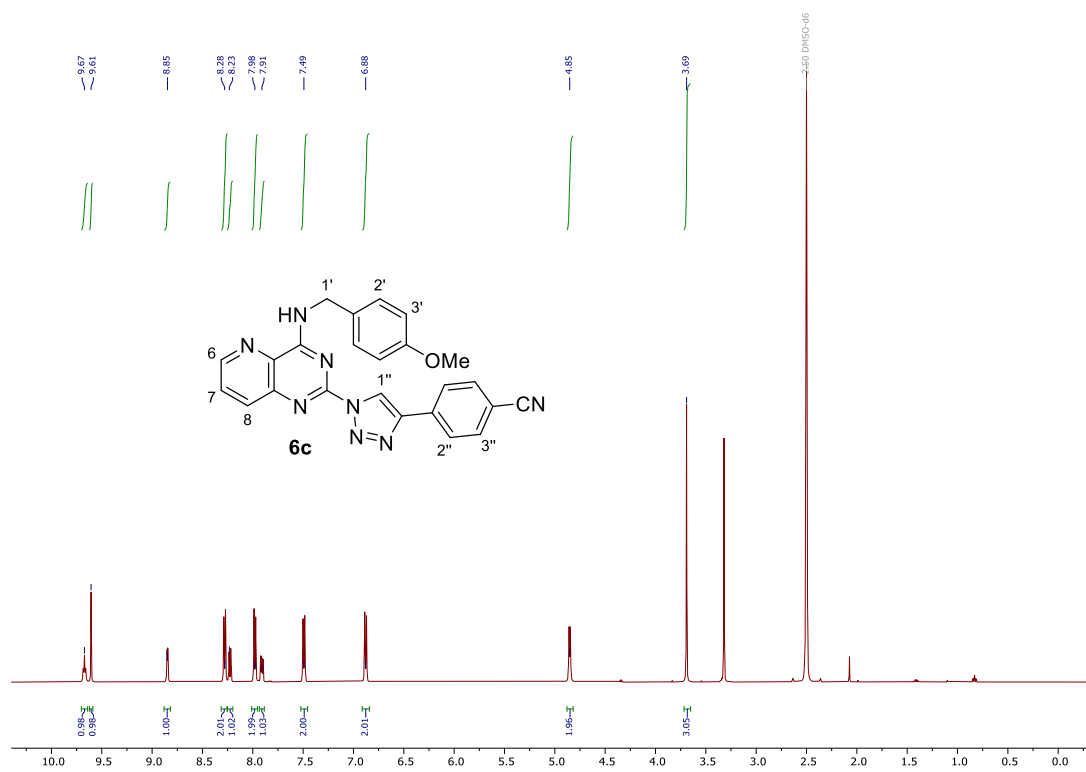

<sup>13</sup>C NMR (125 MHz, DMSO-*d*<sub>6</sub>)

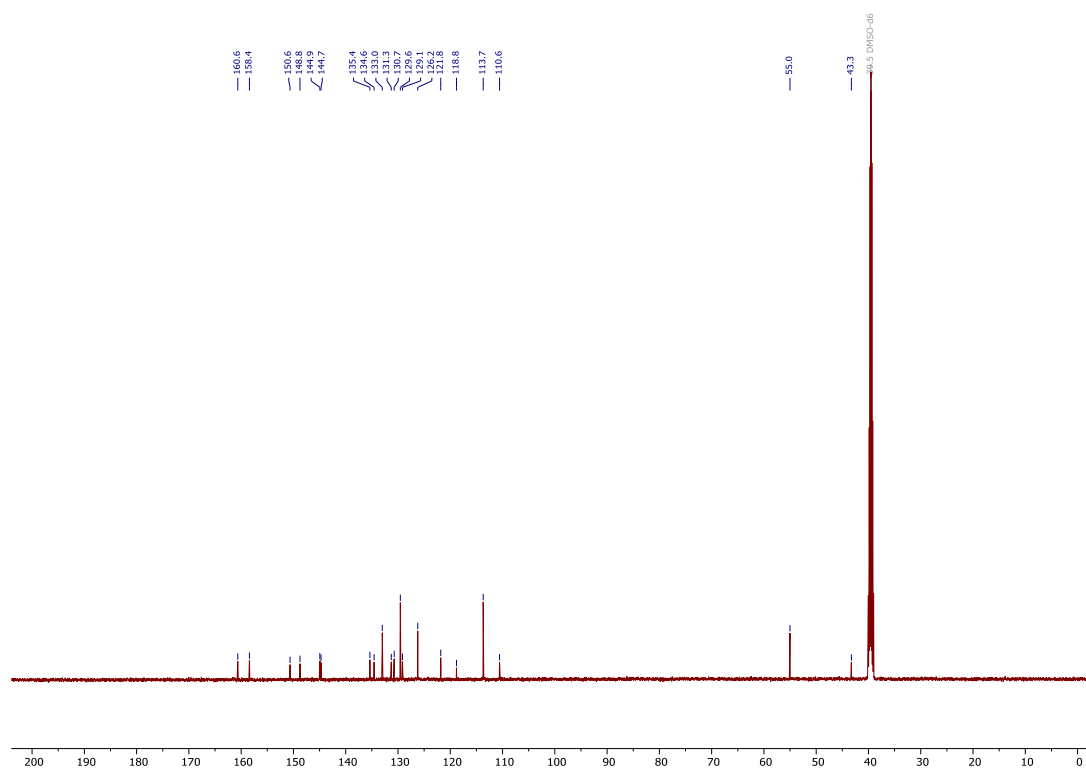

4-(1-(4-((4-Methoxybenzyl)amino)pyrido[3,2-*d*]pyrimidin-2-yl)-1*H*-1,2,3-triazol-4-yl)benzonitrile (**6c**):

<sup>1</sup>H NMR (500 MHz, CDCl<sub>3</sub>)

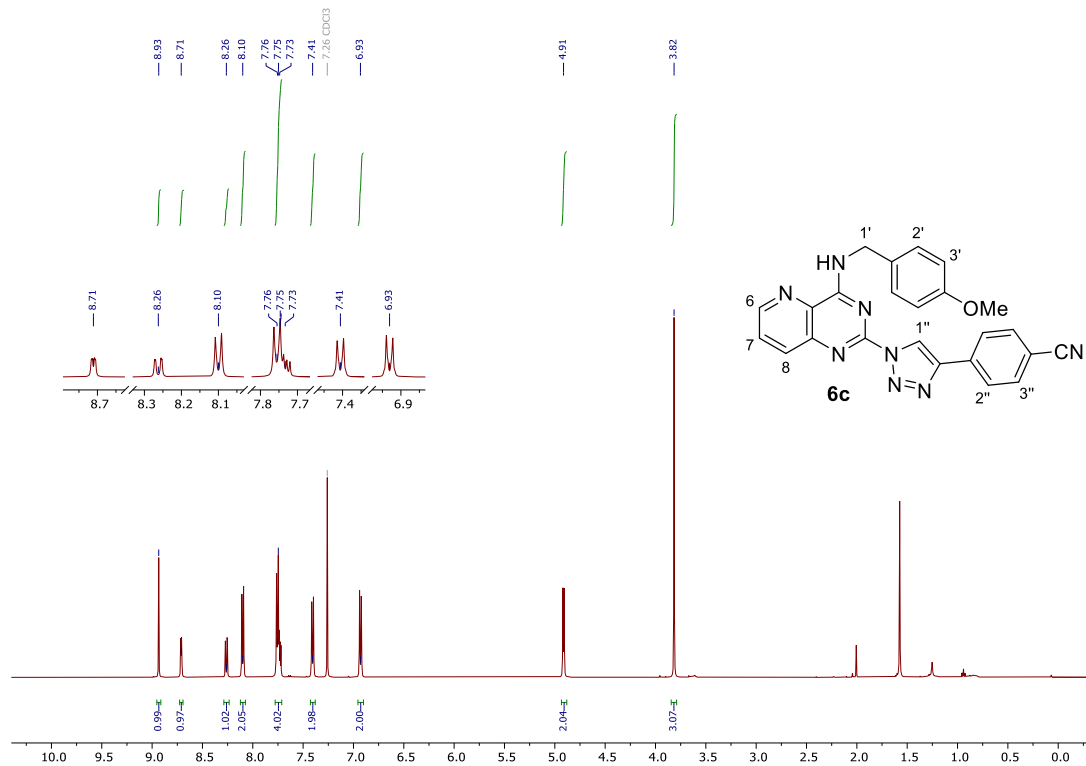

<sup>13</sup>C NMR (125 MHz, CDCl<sub>3</sub>)

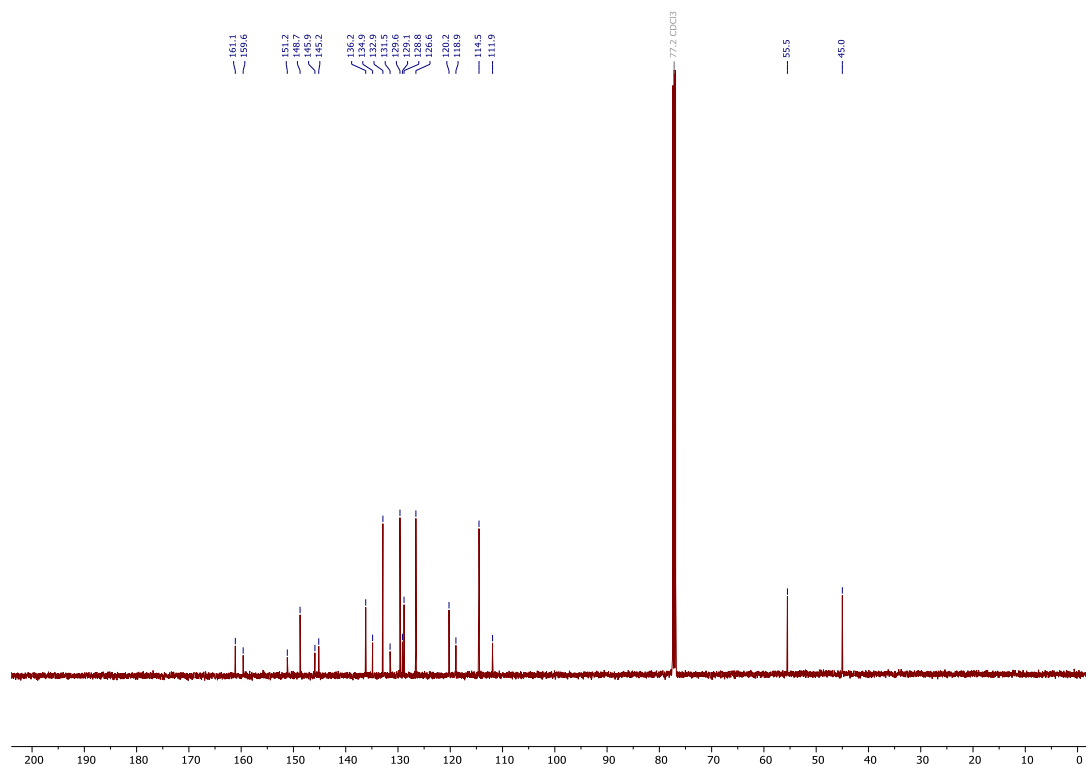

2-(4-Hexyl-1*H*-1,2,3-triazol-1-yl)-*N*-(4-methoxybenzyl)pyrido[3,2-*d*]pyrimidin-4-amine (**6d**):

<sup>1</sup>H NMR (500 MHz, DMSO-*d*<sub>6</sub>)

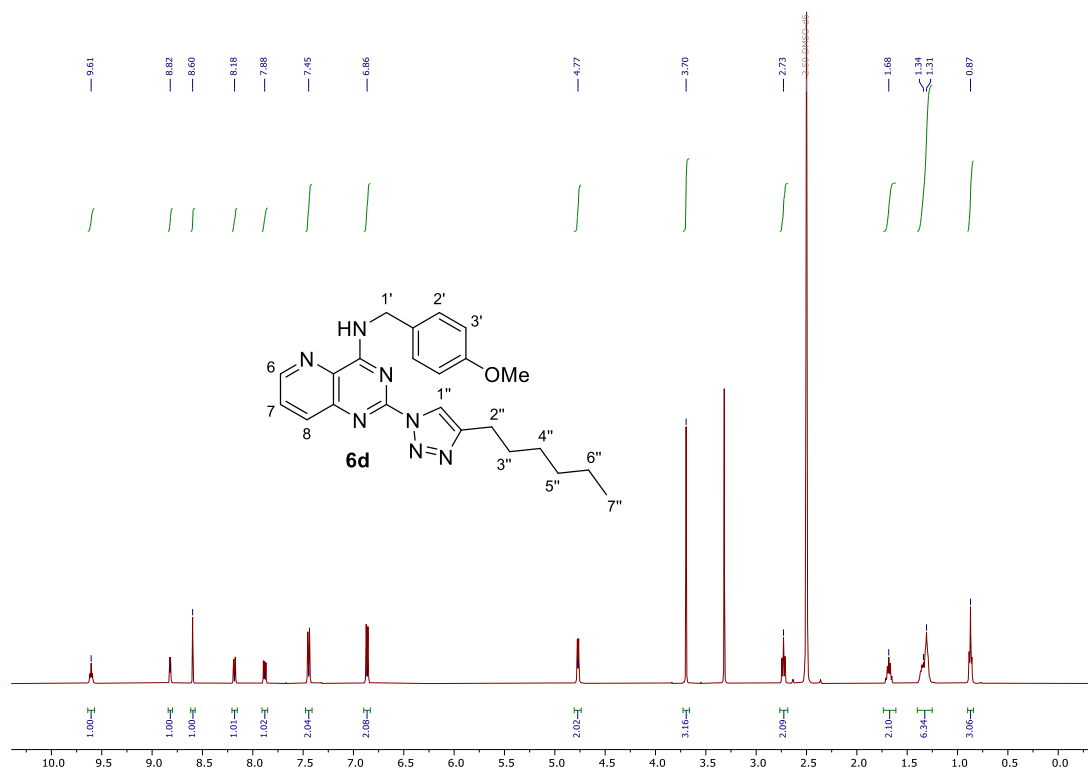

2-(4-Hexyl-1*H*-1,2,3-triazol-1-yl)-*N*-(4-methoxybenzyl)pyrido[3,2-*d*]pyrimidin-4-amine (**6d**):

<sup>1</sup>H NMR (500 MHz, CDCl<sub>3</sub>)

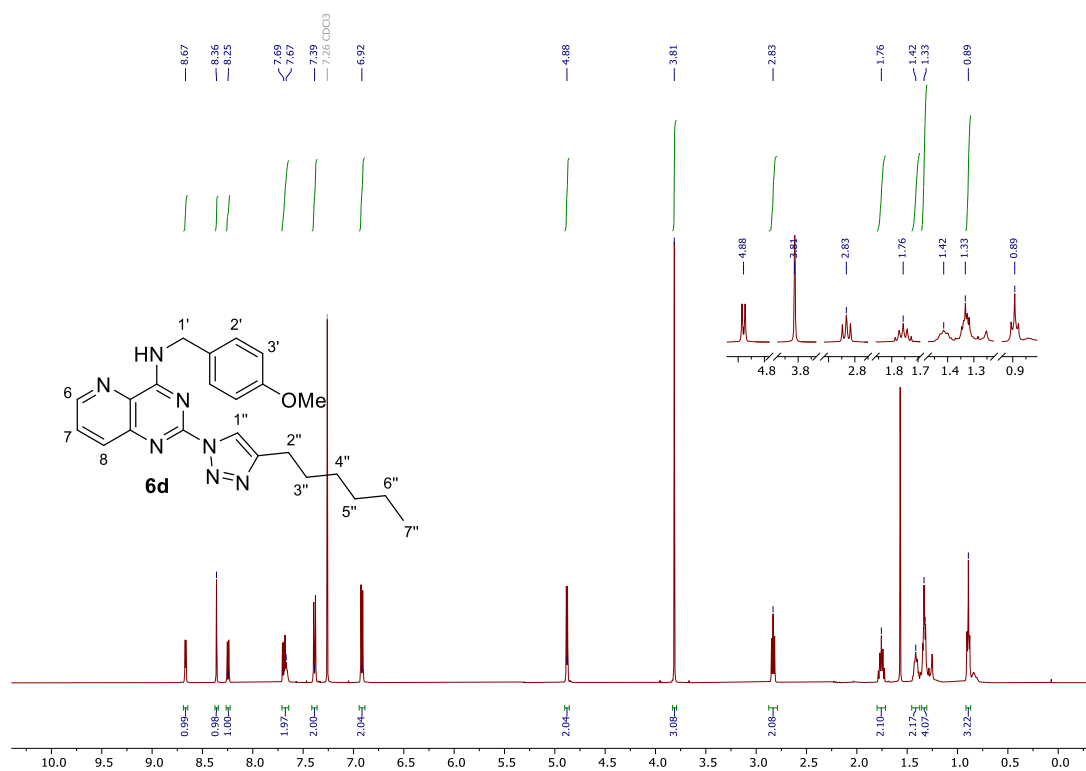

<sup>13</sup>C NMR (125 MHz, CDCl<sub>3</sub>)

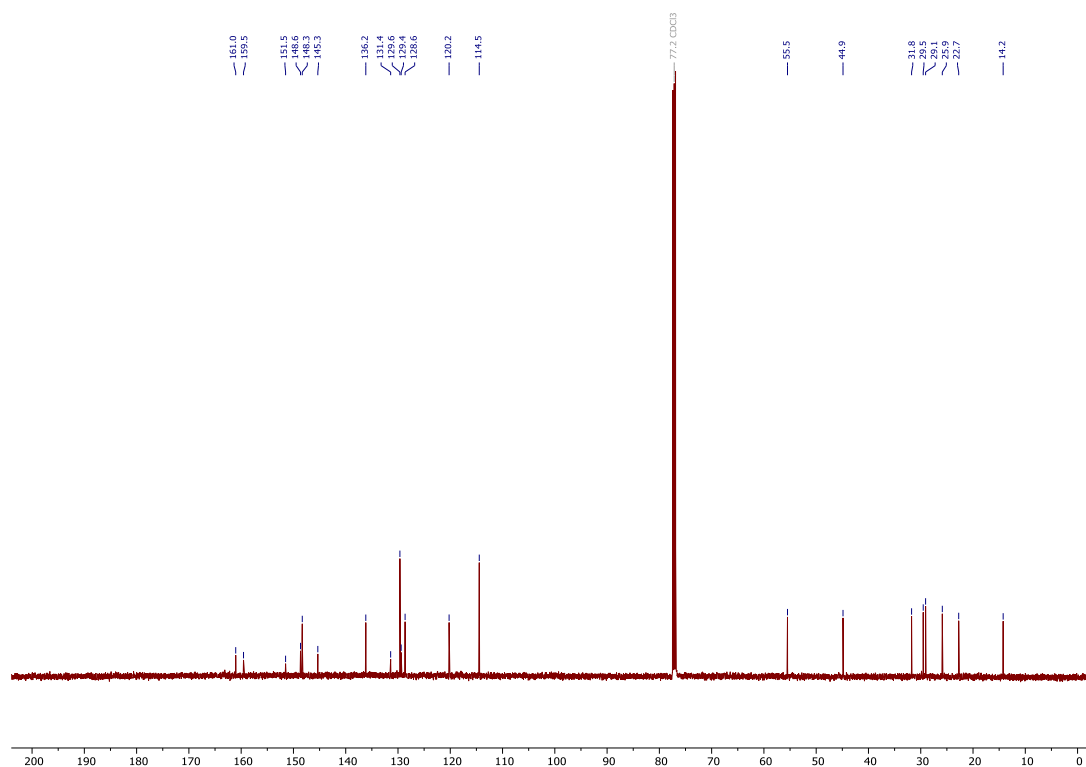

Methyl-1-(4-((4-methoxybenzyl)amino)pyrido[3,2-*d*]pyrimidin-2-yl)-1*H*-1,2,3-triazole-4-carboxylate (**6e**):

$^1\text{H}$  NMR (500 MHz,  $\text{CDCl}_3$ )

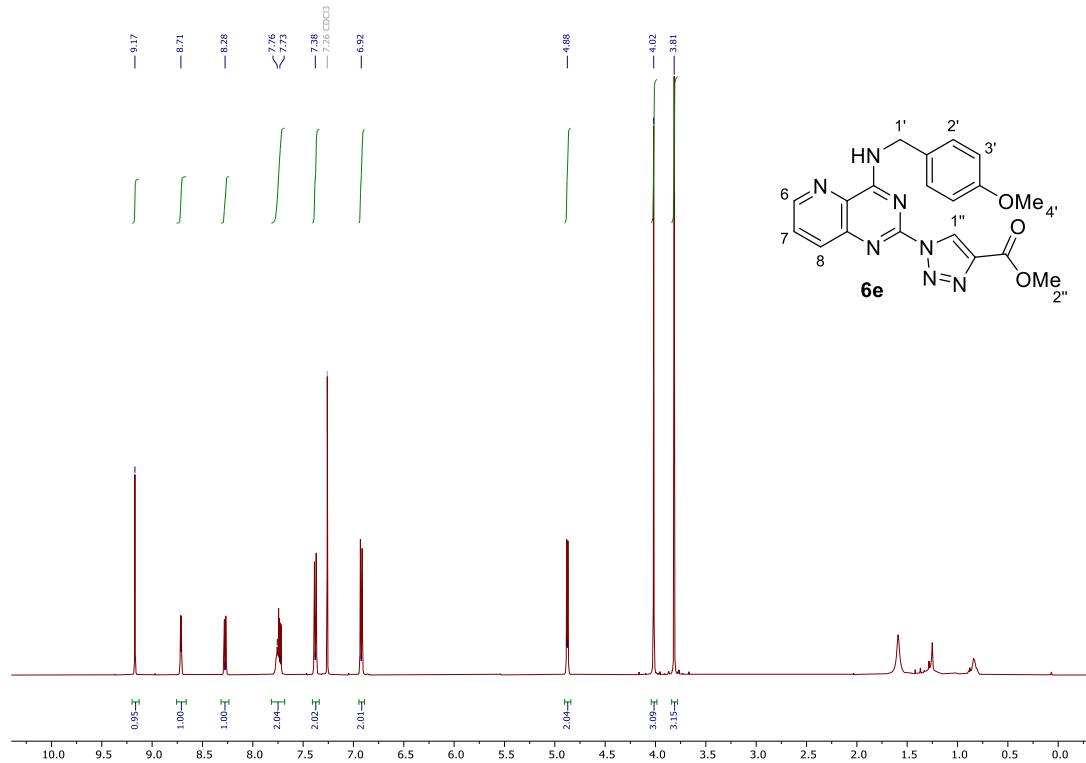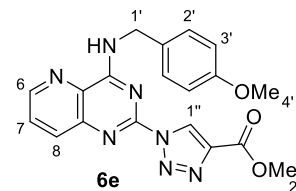

$^{13}\text{C}$  NMR (125 MHz,  $\text{CDCl}_3$ )

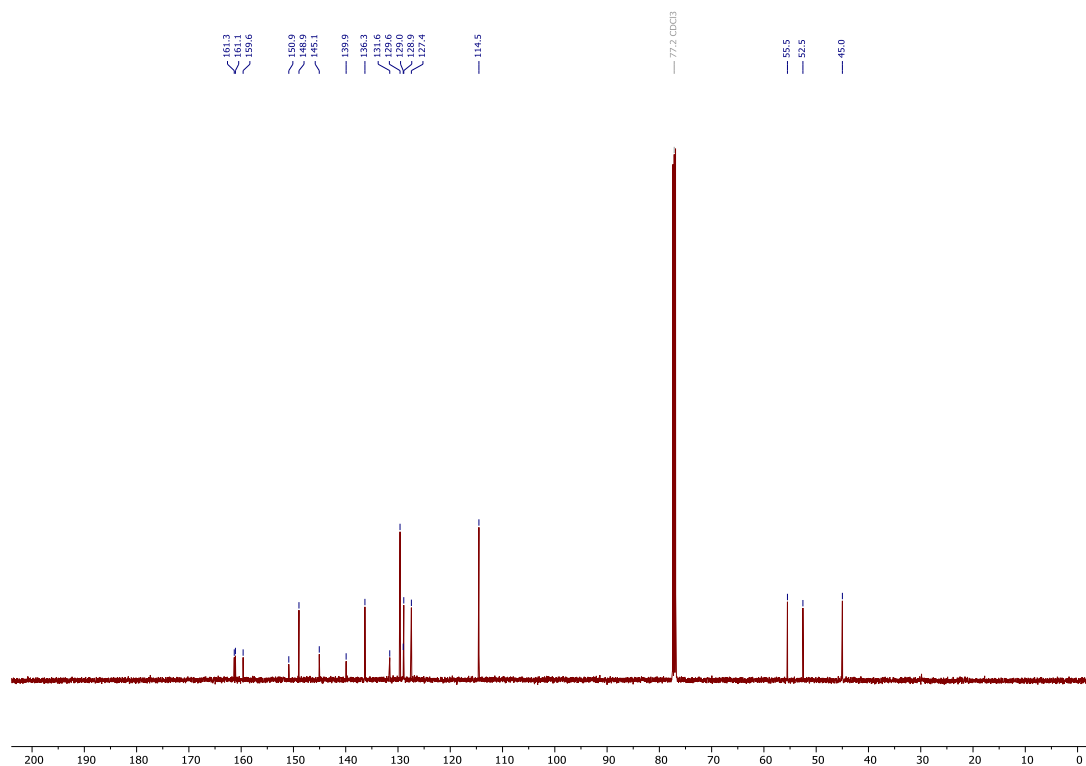

2-(4-Phenyl-1*H*-1,2,3-triazol-1-yl)pyrido[3,2-*d*]pyrimidin-4-amine (**7**):

<sup>1</sup>H NMR (500 MHz, DMSO-*d*<sub>6</sub>)

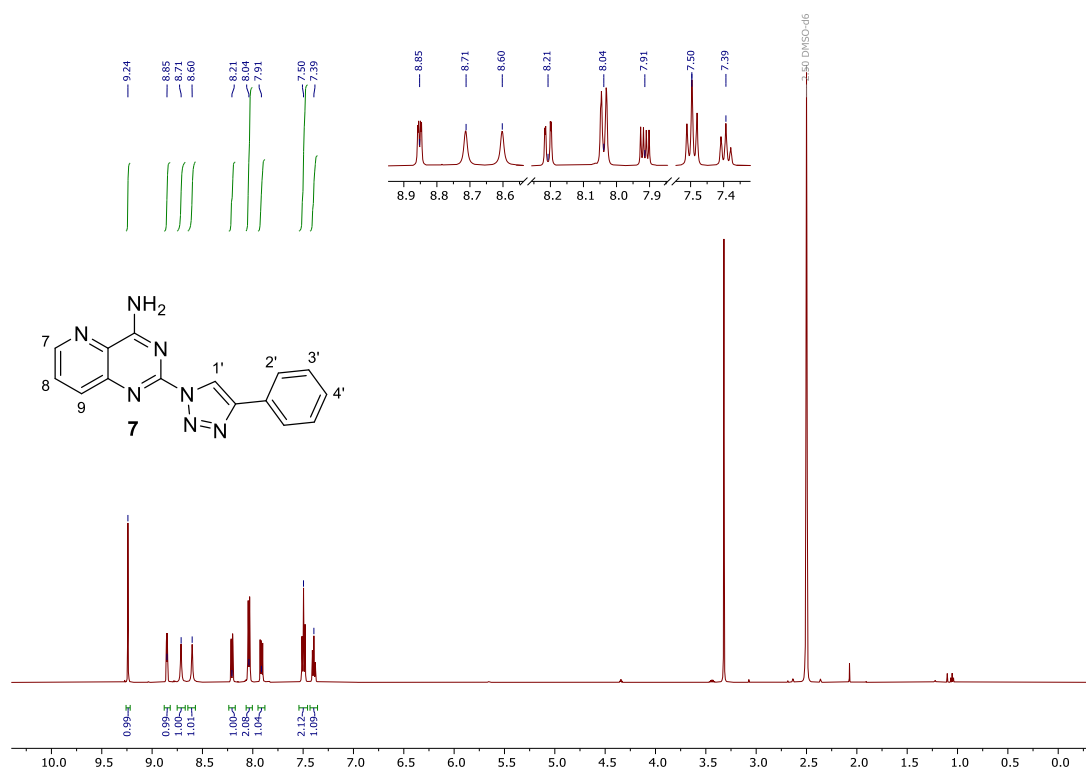

<sup>13</sup>C NMR (125 MHz, DMSO-*d*<sub>6</sub>)

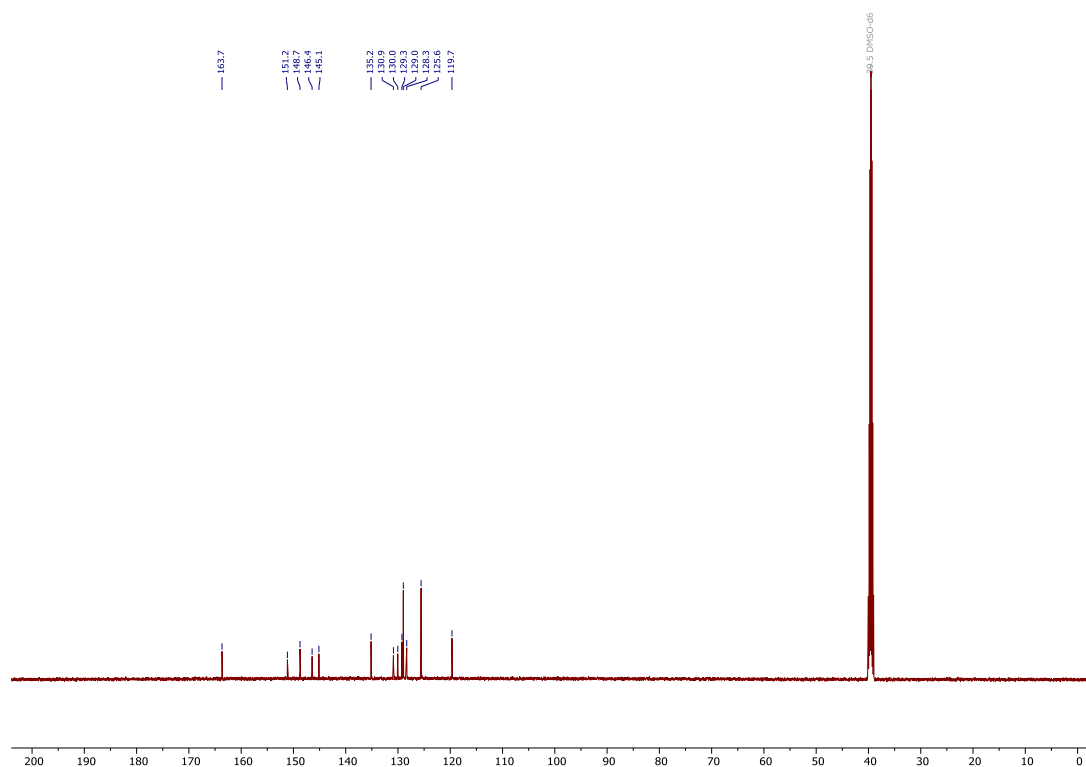

((4-(Hexylamino)pyrido[3,2-*d*]pyrimidin-2(1*H*)-ylidene)amino)triphenylphosphonium chloride (**8'**):

<sup>1</sup>H NMR (500 MHz, DMSO-*d*<sub>6</sub>)

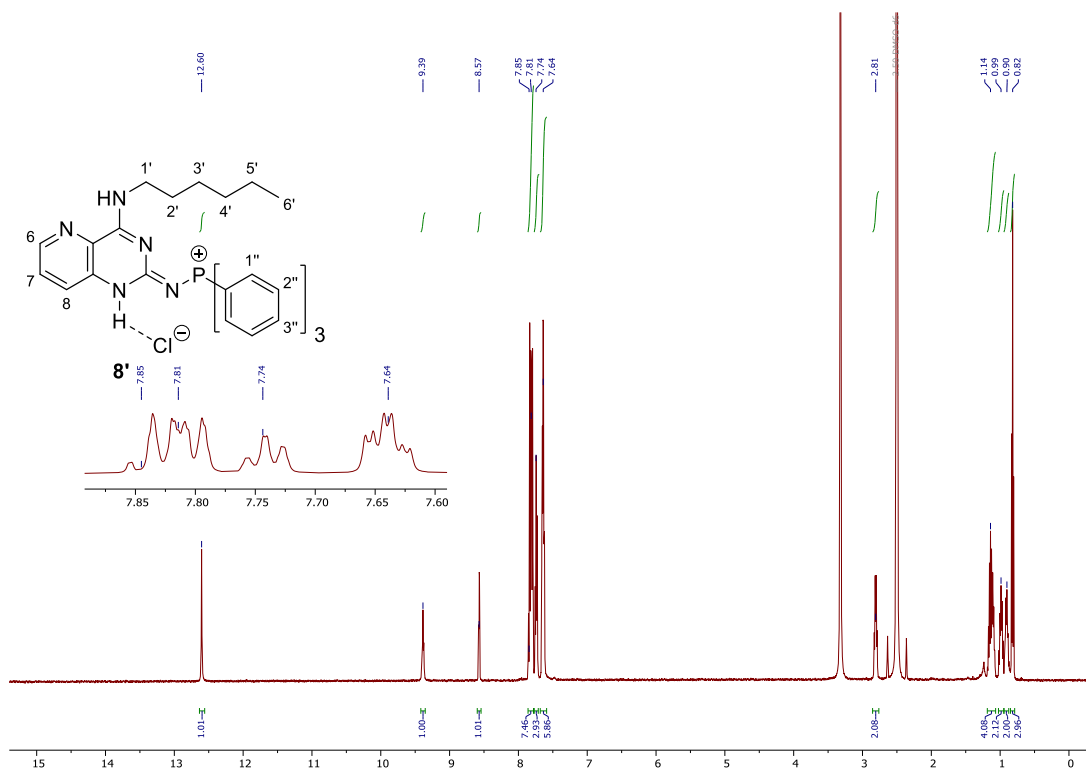

<sup>1</sup>H NMR (500 MHz, CDCl<sub>3</sub>)

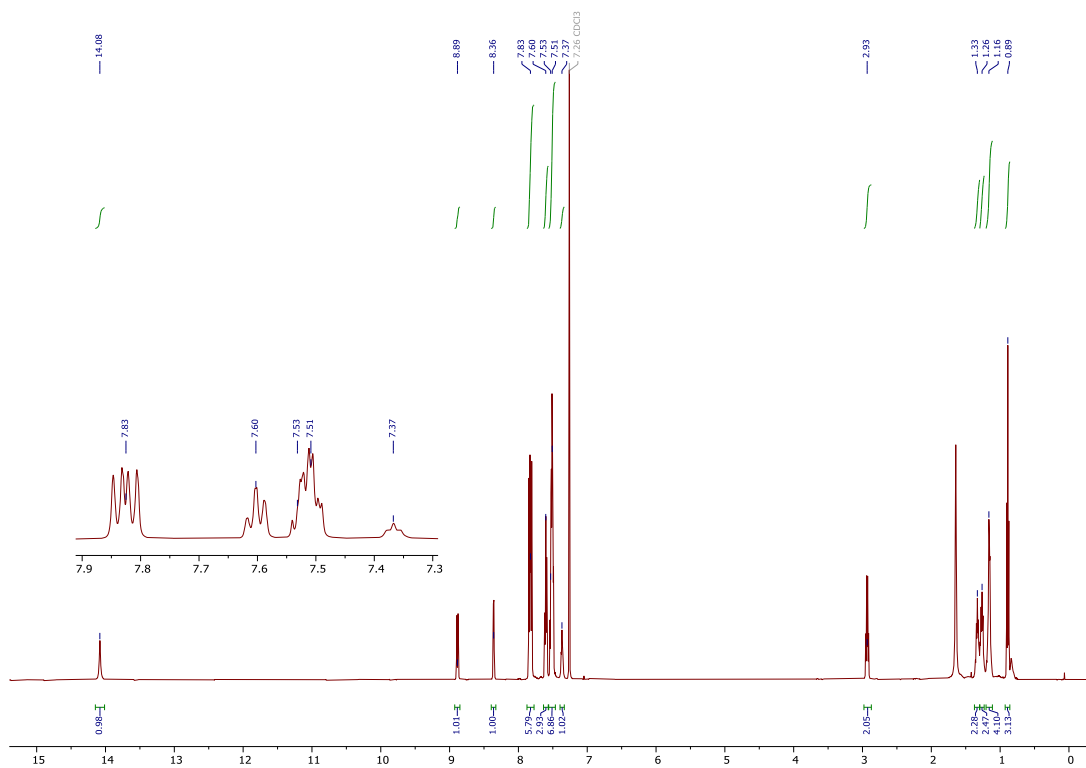

**13C NMR spectrum of compound 10 in CDCl<sub>3</sub>.**

**Chemical Shifts (ppm):**

- 159.2
- 156.9
- 145.3
- 137.9
- 133.3
- 133.2
- 133.0
- 132.9
- 129.1
- 129.1
- 129.0
- 127.6
- 127.3
- 126.8
- 126.3
- 77.2 (CDCl<sub>3</sub>)
- 41.0
- 31.5
- 29.0
- 26.7
- 22.7
- 14.2

**Inset (Aromatic Region):**

- 133.3
- 133.2
- 133.0
- 132.9
- 129.1
- 129.1
- 129.0

The plot shows the 1D momentum distribution function  $g(p)$  as a function of momentum  $p$  in  $\text{GeV}/c$ . The x-axis spans from -150 to 150  $\text{GeV}/c$ , and the y-axis spans from 0.0 to 1.0. Two data series are shown: a blue line for the 19.6 GeV collision system and a red line for the 0.0 HEPc4 collision system. Both distributions are highly peaked at  $p = 0$ , with the 0.0 HEPc4 peak reaching a value of 1.0. A small blue vertical tick mark is present on the x-axis at approximately  $p = 19.6$ .



2-Chloro-*N*-hexylpyrido[3,2-*d*]pyrimidin-4-amine (**9**):

$^1\text{H}$  NMR (500 MHz,  $\text{CDCl}_3$ )

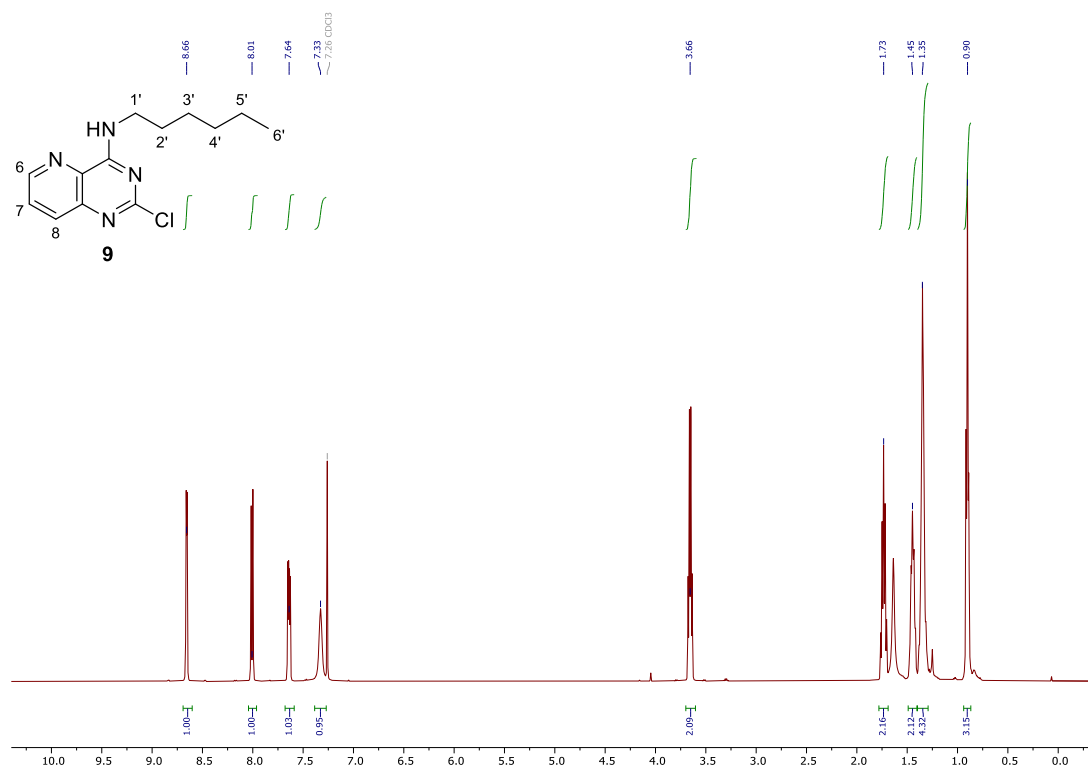

$^{13}\text{C}$  NMR (125 MHz,  $\text{CDCl}_3$ )

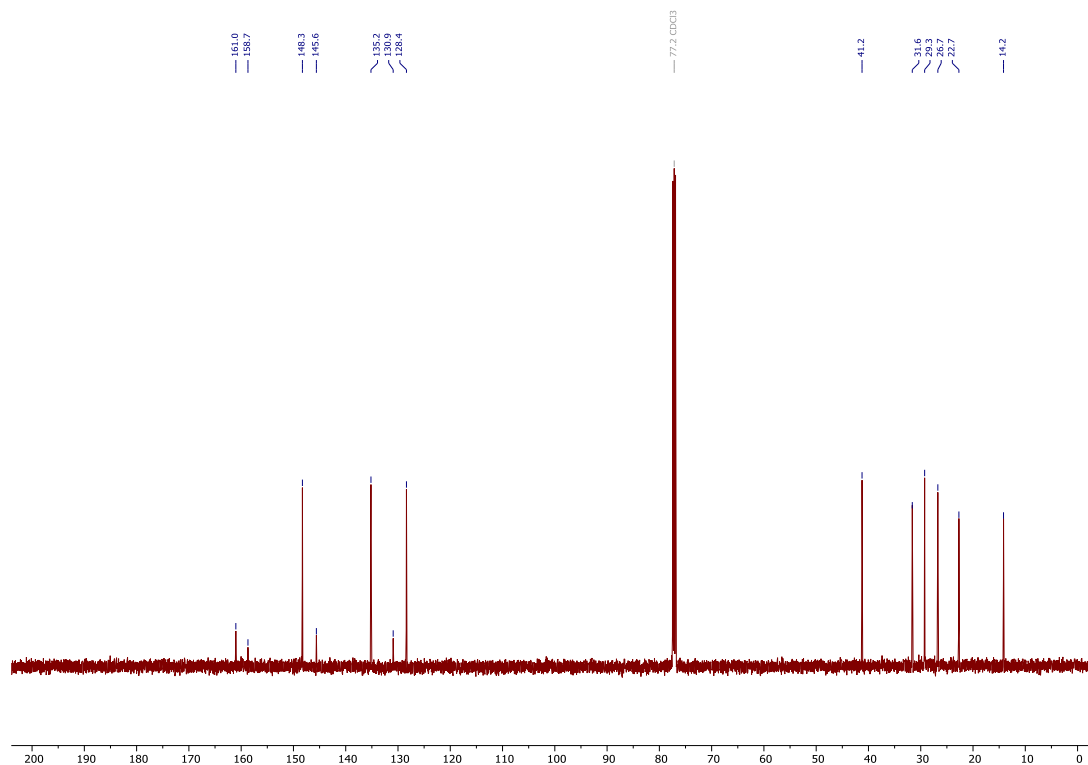

Supplement: s1 [file s1]
